# Supplementary material for: Impaired HA-specific T follicular helper cell and antibody responses to influenza vaccination are linked to inflammation in humans
Source: eLife. 2021 Nov 2;10:e70554. doi: 10.7554/eLife.70554 (PMC8562996; doi:10.7554/eLife.70554)
Supplement: Source data 1. [file elife-70554-supp5.csv]

	gene	log2FoldChange	padj	gene.sign
ENSG00000225630	MTND2P28	1.364455794	8.54E-08	down in d0 cTfh
ENSG00000187608	ISG15	-1.28793744	1.43E-06	up in d7 cTfh
ENSG00000162585	FAAP20	-0.569967502	0.034128583	up in d7 cTfh
ENSG00000162496	DHRS3	1.845957855	0.000217026	down in d0 cTfh
ENSG00000116771	AGMAT	-1.658251746	0.003956676	up in d7 cTfh
ENSG00000233954	UQCRHL	-0.666542078	0.001756269	up in d7 cTfh
ENSG00000206652	RNU1-1	1.237717241	0.001635529	up in d7 cTfh
ENSG00000238142	RP11-108M9.4	1.622841162	0.005064785	up in d7 cTfh
ENSG00000077549	CAPZB	-0.958872493	3.31E-09	up in d7 cTfh
ENSG00000169442	CD52	-1.396306542	2.75E-19	up in d7 cTfh
ENSG00000142733	MAP3K6	0.828965124	0.096116243	down in d0 cTfh
ENSG00000235912	RP1-159A19.3	-0.611631223	0.000779164	up in d7 cTfh
ENSG00000162511	LAPTM5	-0.872400674	1.34E-05	up in d7 cTfh
ENSG00000175130	MARCKSL1	0.681176814	0.028818336	down in d0 cTfh
ENSG00000162521	RBBP4	-0.655427118	0.010694918	up in d7 cTfh
ENSG00000134684	YARS	-0.805544126	0.020893714	up in d7 cTfh
ENSG00000163874	ZC3H12A	1.427253718	1.67E-07	down in d0 cTfh
ENSG00000197982	C1orf122	-0.948679182	0.006802856	up in d7 cTfh
ENSG00000215895	RP11-334L9.1	0.953614673	2.93E-05	down in d0 cTfh
ENSG00000116983	HPCAL4	1.088914663	0.065947465	down in d0 cTfh
ENSG00000168389	MFSD2A	1.051575222	0.090851107	down in d0 cTfh
ENSG00000236876	TMSB4XP1	-0.709299827	0.00087043	up in d7 cTfh
ENSG00000117394	SLC2A1	0.939928602	0.087079951	down in d0 cTfh
ENSG00000173660	UQCRH	-0.711781233	0.000307096	up in d7 cTfh
ENSG00000116171	SCP2	-0.642865829	0.026742737	up in d7 cTfh
ENSG00000177606	JUN	0.910788324	0.003633679	down in d0 cTfh
ENSG00000132849	PATJ	1.370202694	0.000505474	down in d0 cTfh
ENSG00000184588	PDE4B	0.500051392	0.008783266	down in d0 cTfh
ENSG00000273338	RP11-386I14.4	1.151117483	0.001769036	down in d0 cTfh
ENSG00000162645	GBP2	-1.133509458	6.64E-07	up in d7 cTfh
ENSG00000203914	HSP90B3P	1.37572392	1.22E-07	down in d0 cTfh
ENSG00000122484	RPAP2	-0.787911757	0.021466397	up in d7 cTfh
ENSG00000085433	WDR47	0.930691738	0.000344763	down in d0 cTfh
ENSG00000116337	AMPD2	1.756676035	4.75E-09	down in d0 cTfh
ENSG00000162777	DENND2D	-1.170091679	0.000603527	up in d7 cTfh
ENSG00000143110	C1orf162	1.145253314	2.39E-05	down in d0 cTfh
ENSG00000116793	PHTF1	-0.807966333	0.057443067	up in d7 cTfh
ENSG00000081019	RSBN1	0.514318931	0.079241492	down in d0 cTfh
ENSG00000134242	PTPN22	-0.608116754	0.007604691	up in d7 cTfh
ENSG00000235527	HIPK1-AS1	1.018268821	0.053103645	down in d0 cTfh
ENSG00000163349	HIPK1	0.581812593	0.033529675	down in d0 cTfh
ENSG00000276216	CH17-373J23.1	1.355712809	0.002571844	down in d0 cTfh
ENSG00000265972	TXNIP	1.318159342	0.000346287	down in d0 cTfh
ENSG00000271425	NBPF10	0.768035216	0.001894057	down in d0 cTfh
ENSG00000264343	NOTCH2NL	0.620582807	0.085711522	down in d0 cTfh
ENSG00000271121	NUDT4P2	1.009005144	0.044112155	down in d0 cTfh
ENSG00000230832	RP11-325P15.2	0.941794956	0.079191328	down in d0 cTfh
ENSG00000270629	NBPF14	0.726068932	0.000124612	down in d0 cTfh
ENSG00000177144	NUDT4P1	1.344547145	0.004373191	down in d0 cTfh
ENSG00000271383	NBPF19	0.600708577	0.008230254	down in d0 cTfh
ENSG00000277452	RN7SL473P	1.288472564	0.00669046	down in d0 cTfh
ENSG00000229021	AL591893.1	1.045257826	0.086114642	down in d0 cTfh
ENSG00000116586	LAMTOR2	-1.0736751	0.000179977	up in d7 cTfh
ENSG00000160789	LMNA	1.916795737	9.02E-10	down in d0 cTfh
ENSG00000196189	SEMA4A	2.430491918	1.22E-07	down in d0 cTfh
ENSG00000163564	PYHIN1	-0.834168708	0.04578953	up in d7 cTfh
ENSG00000163565	IFI16	-0.865370316	6.40E-06	up in d7 cTfh
ENSG00000163568	AIM2	-1.609202911	0.018885226	up in d7 cTfh
ENSG00000143198	MGST3	0.999521935	4.77E-05	down in d0 cTfh
ENSG00000188404	SELL	-0.623922362	0.037010378	up in d7 cTfh
ENSG00000233328	PFN1P1	-0.942490742	8.42E-05	up in d7 cTfh
ENSG00000116161	CACYBP	-0.971274813	3.07E-07	up in d7 cTfh
ENSG00000162783	IER5	1.264690856	2.20E-10	down in d0 cTfh
ENSG00000135821	GLUL	1.171485626	0.001157871	down in d0 cTfh
ENSG00000143333	RGS16	1.175885265	0.004878871	down in d0 cTfh
ENSG00000135842	FAM129A	1.292064513	2.08E-05	down in d0 cTfh
ENSG00000121481	RNF2	1.129270501	0.003470221	down in d0 cTfh
ENSG00000116679	IVNS1ABP	0.623675233	0.004178427	down in d0 cTfh
ENSG00000090104	RGS1	0.854223822	0.001170752	down in d0 cTfh
ENSG00000000971	CFH	0.912089225	0.008837541	down in d0 cTfh
ENSG00000244414	CFHR1	0.761490156	0.009937618	down in d0 cTfh
ENSG00000162894	FCMR	-0.766097236	0.000458903	up in d7 cTfh
ENSG00000203709	C1orf132	1.152946144	0.075720432	down in d0 cTfh
ENSG00000162909	CAPN2	0.624579387	0.031936482	down in d0 cTfh
ENSG00000162923	WDR26	-0.58125151	0.018060265	up in d7 cTfh
ENSG00000143815	LBR	-0.55595827	0.041673184	up in d7 cTfh
ENSG00000143799	PARP1	-1.005508539	0.000720472	up in d7 cTfh
ENSG00000231940	RPS7P3	-0.768117671	0.094522711	up in d7 cTfh
ENSG00000115738	ID2	1.442212983	1.43E-09	down in d0 cTfh
ENSG00000071575	TRIB2	-1.089164363	0.044634877	up in d7 cTfh
ENSG00000251805	SCARNA21	0.665460444	0.094042366	down in d0 cTfh
ENSG00000115825	PRKD3	1.721959487	8.72E-06	down in d0 cTfh
ENSG00000163171	CDC42EP3	1.116340488	1.28E-05	down in d0 cTfh
ENSG00000143891	GALM	-1.314728401	0.006444582	up in d7 cTfh
ENSG00000115875	SRSF7	0.530485699	0.002197897	down in d0 cTfh
ENSG00000152518	ZFP36L2	0.511199867	0.0135104	down in d0 cTfh
ENSG00000119729	RHOQ	1.081685265	0.042988836	down in d0 cTfh
ENSG00000163219	ARHGAP25	-1.026644632	0.001275442	up in d7 cTfh
ENSG00000124357	NAGK	0.656101118	0.01821618	down in d0 cTfh
ENSG00000233870	AC007881.4	0.604892554	0.069488982	down in d0 cTfh
ENSG00000186854	TRABD2A	1.184546058	0.01384152	down in d0 cTfh
ENSG00000034510	TMSB10	-0.613457661	2.78E-05	up in d7 cTfh
ENSG00000168899	VAMP5	-1.049074295	8.09E-06	up in d7 cTfh
ENSG00000222041	LINC00152	-1.717977678	4.53E-12	up in d7 cTfh
ENSG00000283196	RP4-614C10.2	-0.714829867	0.043901745	up in d7 cTfh
ENSG00000172005	MAL	1.332716727	0.000996461	down in d0 cTfh
ENSG00000213337	ANKRD39	-0.811537779	0.079235985	up in d7 cTfh
ENSG00000168758	SEMA4C	1.205740009	0.020373871	down in d0 cTfh
ENSG00000071073	MGAT4A	0.609310794	0.003344327	down in d0 cTfh
ENSG00000115539	PDCL3	-1.005131072	5.41E-05	up in d7 cTfh
ENSG00000115604	IL18R1	1.228106105	0.026356354	down in d0 cTfh
ENSG00000169756	LIMS1	-0.953411054	0.000974038	up in d7 cTfh
ENSG00000256977	LIMS3	-1.375433244	0.000258622	up in d7 cTfh
ENSG00000153094	BCL2L11	-1.177771044	0.00059789	up in d7 cTfh
ENSG00000172965	MIR4435-2HG	-2.379671872	2.17E-14	up in d7 cTfh
ENSG00000240350	AC017002.1	-1.473435416	0.005663943	up in d7 cTfh
ENSG00000125611	CHCHD5	-0.92126925	0.017153827	up in d7 cTfh
ENSG00000155368	DBI	-0.540924541	0.001651491	up in d7 cTfh
ENSG00000088179	PTPN4	0.63215551	0.092075629	down in d0 cTfh
ENSG00000136732	GYPC	-1.371936699	4.18E-08	up in d7 cTfh
ENSG00000238180	AC017079.4	1.915938761	8.01E-05	down in d0 cTfh
ENSG00000173272	MZT2A	-0.566392214	0.014506427	up in d7 cTfh
ENSG00000076003	MCM6	-0.870901101	0.001641888	up in d7 cTfh
ENSG00000121966	CXCR4	1.140086195	1.25E-08	down in d0 cTfh
ENSG00000168280	KIF5C	1.361798334	0.046778065	down in d0 cTfh
ENSG00000153250	RBMS1	0.745323358	0.001155674	down in d0 cTfh
ENSG00000197635	DPP4	1.905804726	0.000229846	down in d0 cTfh
ENSG00000115271	GCA	1.191722659	0.010708841	down in d0 cTfh
ENSG00000196659	TTC30B	0.892669357	0.011533449	down in d0 cTfh
ENSG00000138449	SLC40A1	1.911959023	0.001698475	down in d0 cTfh
ENSG00000138386	NAB1	-1.800192145	6.12E-06	up in d7 cTfh
ENSG00000138378	STAT4	0.646629463	0.005242205	down in d0 cTfh
ENSG00000229056	AC020571.3	1.131556983	0.075980502	down in d0 cTfh
ENSG00000213104	NPM1P46	1.263639462	0.005009787	down in d0 cTfh
ENSG00000119013	NDUFB3	-0.748579743	0.036432899	up in d7 cTfh
ENSG00000116030	SUMO1	-0.954230519	1.09E-07	up in d7 cTfh
ENSG00000178562	CD28	-0.755874746	0.000944369	up in d7 cTfh
ENSG00000163599	CTLA4	-2.197414974	2.60E-09	up in d7 cTfh
ENSG00000163600	ICOS	-1.213617428	1.34E-05	up in d7 cTfh
ENSG00000118246	FASTKD2	0.629362999	0.052629629	down in d0 cTfh
ENSG00000163466	ARPC2	-0.946196401	3.28E-12	up in d7 cTfh
ENSG00000079263	SP140	-0.871481333	0.00056905	up in d7 cTfh
ENSG00000135930	EIF4E2	-0.743052877	0.000127287	up in d7 cTfh
ENSG00000172428	COPS9	-0.679414247	1.83E-05	up in d7 cTfh
ENSG00000122085	MTERF4	-1.049616597	0.000286165	up in d7 cTfh
ENSG00000115687	PASK	-1.507117862	0.000194778	up in d7 cTfh
ENSG00000115685	PPP1R7	-0.977100164	1.26E-06	up in d7 cTfh
ENSG00000176946	THAP4	-1.052874407	0.02610885	up in d7 cTfh
ENSG00000188389	PDCD1	-2.74057801	3.32E-11	up in d7 cTfh
ENSG00000091181	IL5RA	1.149965343	0.009219982	down in d0 cTfh
ENSG00000134107	BHLHE40	1.864629104	2.03E-09	down in d0 cTfh
ENSG00000241553	ARPC4	-1.135519504	0.001058088	up in d7 cTfh
ENSG00000154764	WNT7A	2.358718402	5.75E-06	down in d0 cTfh
ENSG00000206560	ANKRD28	1.128480146	0.005983413	down in d0 cTfh
ENSG00000132967	HMGB1P5	-0.880053799	5.10E-10	up in d7 cTfh
ENSG00000174738	NR1D2	0.568030716	0.046561947	down in d0 cTfh
ENSG00000153551	CMTM7	-0.69115216	0.002039713	up in d7 cTfh
ENSG00000224094	RPS24P8	-0.505936915	0.00287509	up in d7 cTfh
ENSG00000181555	SETD2	-1.322333453	4.50E-09	up in d7 cTfh
ENSG00000145050	MANF	0.69862815	0.045253772	down in d0 cTfh
ENSG00000247596	TWF2	-1.003169413	0.000830319	up in d7 cTfh
ENSG00000164088	PPM1M	-0.828206774	0.086814182	up in d7 cTfh
ENSG00000237456	RP11-154D3.1	2.023944751	4.79E-06	up in d7 cTfh
ENSG00000163634	THOC7	-0.601823312	0.03182566	up in d7 cTfh
ENSG00000183662	FAM19A1	1.160091063	0.044582817	down in d0 cTfh
ENSG00000114861	FOXP1	-0.685701998	0.000358345	up in d7 cTfh
ENSG00000114573	ATP6V1A	-1.081384523	0.005561955	up in d7 cTfh
ENSG00000181847	TIGIT	-1.697627662	0.00155375	up in d7 cTfh
ENSG00000214301	RP11-91K8.4	-0.918428956	0.037187275	up in d7 cTfh
ENSG00000144895	EIF2A	0.625545978	0.003114393	down in d0 cTfh
ENSG00000240489	SETP14	-0.792093569	0.028352224	up in d7 cTfh
ENSG00000154310	TNIK	-0.890723092	0.001830033	up in d7 cTfh
ENSG00000161203	AP2M1	-0.580795864	0.020278539	up in d7 cTfh
ENSG00000156976	EIF4A2	0.534047654	0.001547892	down in d0 cTfh
ENSG00000180611	MB21D2	1.789909592	0.001128437	down in d0 cTfh
ENSG00000213123	TCTEX1D2	-1.097746703	0.053735671	up in d7 cTfh
ENSG00000169020	ATP5I	-0.524625727	0.006069646	up in d7 cTfh
ENSG00000163950	SLBP	-1.105074532	1.80E-08	up in d7 cTfh
ENSG00000013810	TACC3	-0.755254522	0.036261217	up in d7 cTfh
ENSG00000243449	C4orf48	-0.812391688	0.00239687	up in d7 cTfh
ENSG00000123933	MXD4	-1.133423726	3.65E-05	up in d7 cTfh
ENSG00000145220	LYAR	0.988907182	0.028133626	down in d0 cTfh
ENSG00000168824	NSG1	2.018653729	9.27E-05	down in d0 cTfh
ENSG00000004468	CD38	-1.800398908	0.001029627	up in d7 cTfh
ENSG00000002549	LAP3	-1.064790102	4.57E-06	up in d7 cTfh
ENSG00000047365	ARAP2	-1.637645901	1.90E-14	up in d7 cTfh
ENSG00000247193	RP11-431M7.3	-1.791940087	0.008205583	up in d7 cTfh
ENSG00000248780	ARL4AP2	1.280996849	1.06E-08	down in d0 cTfh
ENSG00000145247	OCIAD2	-1.09368738	9.16E-08	up in d7 cTfh
ENSG00000138670	RASGEF1B	1.303825849	8.67E-05	down in d0 cTfh
ENSG00000145287	PLAC8	-0.891515767	0.00068767	up in d7 cTfh
ENSG00000187653	TMSB4XP8	-0.647467039	0.001025265	up in d7 cTfh
ENSG00000197894	ADH5	-0.573449566	0.045073136	up in d7 cTfh
ENSG00000005059	MCUB	-0.606524543	7.78E-05	up in d7 cTfh
ENSG00000250215	CIR1P2	-0.623453889	0.074615915	up in d7 cTfh
ENSG00000138684	IL21	-0.978716255	0.062246362	up in d7 cTfh
ENSG00000077684	JADE1	0.782917898	0.024795868	down in d0 cTfh
ENSG00000164163	ABCE1	0.546430876	0.086945621	down in d0 cTfh
ENSG00000170365	SMAD1	-1.013767934	0.044886803	up in d7 cTfh
ENSG00000121207	LRAT	-1.6237199	0.0135104	up in d7 cTfh
ENSG00000250746	RP11-39C10.1	0.51537866	0.051004608	down in d0 cTfh
ENSG00000164104	HMGB2	-0.544925856	0.005378841	up in d7 cTfh
ENSG00000164120	HPGD	0.853727094	0.011052567	down in d0 cTfh
ENSG00000164305	CASP3	-0.698354906	0.027380059	up in d7 cTfh
ENSG00000151729	SLC25A4	1.447710353	0.001248656	down in d0 cTfh
ENSG00000171368	TPPP	1.268242934	0.064644804	down in d0 cTfh
ENSG00000206077	ZDHHC11B	1.668559374	0.00176931	down in d0 cTfh
ENSG00000188818	ZDHHC11	1.572923766	0.018912817	down in d0 cTfh
ENSG00000145494	NDUFS6	-0.730530405	0.000265186	up in d7 cTfh
ENSG00000168685	IL7R	0.795321181	0.001098636	down in d0 cTfh
ENSG00000082074	FYB	-0.976138933	1.68E-08	up in d7 cTfh
ENSG00000171522	PTGER4	0.93275535	6.87E-07	down in d0 cTfh
ENSG00000112972	HMGCS1	0.923951341	0.039047184	down in d0 cTfh
ENSG00000250461	RP11-631M6.2	0.621708975	0.034347517	down in d0 cTfh
ENSG00000181104	F2R	-1.198921126	0.07572325	up in d7 cTfh
ENSG00000164300	SERINC5	-0.522705163	0.04955974	up in d7 cTfh
ENSG00000238000	RP11-274E7.2	-0.560836805	0.052556788	up in d7 cTfh
ENSG00000151422	FER	1.736826394	0.000411451	down in d0 cTfh
ENSG00000164209	SLC25A46	-1.124893563	0.031937576	up in d7 cTfh
ENSG00000172795	DCP2	-0.924456115	0.000108521	up in d7 cTfh
ENSG00000169567	HINT1	-0.545288056	0.00023204	up in d7 cTfh
ENSG00000164405	UQCRQ	-0.528672517	0.000336546	up in d7 cTfh
ENSG00000081059	TCF7	-0.70122012	0.018803066	up in d7 cTfh
ENSG00000249119	MTND6P4	2.081533697	2.45E-10	down in d0 cTfh
ENSG00000247627	MTND4P12	1.141940138	0.011038461	down in d0 cTfh
ENSG00000177733	HNRNPA0	0.720675401	0.077940545	down in d0 cTfh
ENSG00000120727	PAIP2	-0.521556281	8.42E-05	up in d7 cTfh
ENSG00000145819	ARHGAP26	0.906838714	0.000763325	down in d0 cTfh
ENSG00000169252	ADRB2	1.704466793	6.03E-05	down in d0 cTfh
ENSG00000164284	GRPEL2	-1.190802617	0.054711081	up in d7 cTfh
ENSG00000253618	GRPEL2-AS1	-1.074185585	0.098674118	up in d7 cTfh
ENSG00000198624	CCDC69	-0.603404686	0.059700223	up in d7 cTfh
ENSG00000120129	DUSP1	1.93062564	1.57E-13	down in d0 cTfh
ENSG00000164466	SFXN1	-1.0332568	6.58E-08	up in d7 cTfh
ENSG00000182230	FAM153B	1.45741399	0.025860246	down in d0 cTfh
ENSG00000146066	HIGD2A	-0.55706712	0.004364319	up in d7 cTfh
ENSG00000184840	TMED9	1.168919458	0.003208037	down in d0 cTfh
ENSG00000113240	CLK4	0.525842652	0.055854059	down in d0 cTfh
ENSG00000161011	SQSTM1	0.632248629	0.001126252	down in d0 cTfh
ENSG00000124570	SERPINB6	0.968972194	0.097347682	down in d0 cTfh
ENSG00000137267	TUBB2A	1.086500781	0.000308119	down in d0 cTfh
ENSG00000137285	TUBB2B	1.109077631	0.000116663	down in d0 cTfh
ENSG00000111845	PAK1IP1	0.896449596	0.039336472	down in d0 cTfh
ENSG00000112149	CD83	1.892601054	1.04E-10	down in d0 cTfh
ENSG00000229646	RP11-330A16.1	-2.729608635	6.52E-06	up in d7 cTfh
ENSG00000187837	HIST1H1C	-0.824987871	0.03223944	up in d7 cTfh
ENSG00000111801	BTN3A3	-0.785713542	0.083287471	up in d7 cTfh
ENSG00000272009	RP1-313I6.12	1.47913873	4.82E-05	down in d0 cTfh
ENSG00000197279	ZNF165	2.005321803	6.23E-07	down in d0 cTfh
ENSG00000146112	PPP1R18	-0.669285449	0.044886803	up in d7 cTfh
ENSG00000227939	RPL3P2	1.075296506	4.16E-12	down in d0 cTfh
ENSG00000227507	LTB	-0.834956129	4.96E-05	up in d7 cTfh
ENSG00000213654	GPSM3	-0.984826646	3.49E-06	up in d7 cTfh
ENSG00000232629	HLA-DQB2	2.639362549	1.31E-08	down in d0 cTfh
ENSG00000204264	PSMB8	-0.839198197	2.51E-06	up in d7 cTfh
ENSG00000240065	PSMB9	-0.669651434	0.002358665	up in d7 cTfh
ENSG00000112511	PHF1	0.861198411	0.002602439	down in d0 cTfh
ENSG00000214810	CYCSP55	0.62760829	0.001852517	down in d0 cTfh
ENSG00000137309	HMGA1	-0.860099519	0.000972283	up in d7 cTfh
ENSG00000124762	CDKN1A	1.250823401	2.53E-09	down in d0 cTfh
ENSG00000124702	KLHDC3	-0.981934193	0.043366019	up in d7 cTfh
ENSG00000112667	DNPH1	-0.741215283	0.065673957	up in d7 cTfh
ENSG00000171453	POLR1C	0.948407386	0.000257921	down in d0 cTfh
ENSG00000219163	HMGB1P20	1.330466715	0.03467822	down in d0 cTfh
ENSG00000198225	FKBP1C	-0.91354005	0.005603565	up in d7 cTfh
ENSG00000112773	FAM46A	1.215825069	0.009482076	down in d0 cTfh
ENSG00000225093	RPL3P7	0.98673804	1.13E-10	down in d0 cTfh
ENSG00000074935	TUBE1	0.824972166	0.058336602	down in d0 cTfh
ENSG00000111817	DSE	1.919334738	0.000294276	down in d0 cTfh
ENSG00000189241	TSPYL1	0.538307132	0.090757842	down in d0 cTfh
ENSG00000111906	HDDC2	-0.912795292	0.073818392	up in d7 cTfh
ENSG00000221500	SNORD100	1.358447711	0.003882312	down in d0 cTfh
ENSG00000118515	SGK1	0.618285918	0.035326842	down in d0 cTfh
ENSG00000027697	IFNGR1	0.761076448	0.004011351	down in d0 cTfh
ENSG00000237499	RP11-356I2.4	1.114852421	0.003180316	down in d0 cTfh
ENSG00000118503	TNFAIP3	1.758054921	7.07E-18	down in d0 cTfh
ENSG00000024862	CCDC28A	-0.791356749	0.001769583	up in d7 cTfh
ENSG00000218996	RP1-99E18.2	0.80562777	0.004253138	down in d0 cTfh
ENSG00000164674	SYTL3	0.586938116	0.096950461	down in d0 cTfh
ENSG00000198818	SFT2D1	-0.704370509	0.017893528	up in d7 cTfh
ENSG00000235272	FAM103A2P	-0.509917427	0.07423012	up in d7 cTfh
ENSG00000112486	CCR6	1.465632799	0.010660068	down in d0 cTfh
ENSG00000122644	ARL4A	1.071996389	8.80E-07	down in d0 cTfh
ENSG00000105926	MPP6	0.800697223	0.080875713	down in d0 cTfh
ENSG00000172115	CYCS	0.527509961	0.007198149	down in d0 cTfh
ENSG00000155849	ELMO1	-0.655896739	0.016870913	up in d7 cTfh
ENSG00000105968	H2AFV	-0.767673045	2.97E-06	up in d7 cTfh
ENSG00000136280	CCM2	-0.936096549	0.000175065	up in d7 cTfh
ENSG00000183696	UPP1	0.951080012	4.00E-05	down in d0 cTfh
ENSG00000126524	SBDS	0.683614581	0.001147639	down in d0 cTfh
ENSG00000225648	SBDSP1	0.717660527	0.026926461	down in d0 cTfh
ENSG00000146701	MDH2	-0.690098867	0.000491703	up in d7 cTfh
ENSG00000200397	Y_RNA	0.902880574	0.04762764	down in d0 cTfh
ENSG00000085563	ABCB1	1.577897605	0.001380829	down in d0 cTfh
ENSG00000127922	SHFM1	-0.898861121	1.34E-08	up in d7 cTfh
ENSG00000266019	MIR3609	1.780901401	0.001006581	down in d0 cTfh
ENSG00000130429	ARPC1B	-0.915520829	4.44E-07	up in d7 cTfh
ENSG00000106400	ZNHIT1	-0.689194567	0.004066372	up in d7 cTfh
ENSG00000214253	FIS1	-0.517533078	0.012762723	up in d7 cTfh
ENSG00000223886	RP11-251G23.2	-1.118070791	0.088098235	up in d7 cTfh
ENSG00000008282	SYPL1	0.591090772	0.044112155	down in d0 cTfh
ENSG00000253276	CCDC71L	1.125672019	0.067569843	down in d0 cTfh
ENSG00000128590	DNAJB9	0.656910148	0.026155067	down in d0 cTfh
ENSG00000004059	ARF5	-0.960996286	9.38E-06	up in d7 cTfh
ENSG00000186591	UBE2H	-0.525597873	0.090464051	up in d7 cTfh
ENSG00000146859	TMEM140	-1.086901507	0.03519691	up in d7 cTfh
ENSG00000105929	ATP6V0A4	-0.946570168	0.098088974	up in d7 cTfh
ENSG00000211772	TRBC2	-1.029411971	5.16E-06	up in d7 cTfh
ENSG00000197448	GSTK1	-0.781264822	2.32E-08	up in d7 cTfh
ENSG00000231531	HINT1P1	-0.781432146	0.000101316	up in d7 cTfh
ENSG00000201098	RNY1	1.990510445	2.50E-06	down in d0 cTfh
ENSG00000133574	GIMAP4	-1.135785005	0.001154971	up in d7 cTfh
ENSG00000106615	RHEB	0.653137077	0.001128839	down in d0 cTfh
ENSG00000005302	MSL3	-0.842606992	0.001714303	up in d7 cTfh
ENSG00000205542	TMSB4X	-0.766596274	4.10E-06	up in d7 cTfh
ENSG00000047634	SCML1	1.446911154	0.001063898	down in d0 cTfh
ENSG00000147010	SH3KBP1	-0.899057423	3.64E-07	up in d7 cTfh
ENSG00000198814	GK	-1.149407698	0.017172078	up in d7 cTfh
ENSG00000165169	DYNLT3	1.200487017	0.000322251	down in d0 cTfh
ENSG00000183690	EFHC2	0.839980684	0.027418973	down in d0 cTfh
ENSG00000102007	PLP2	0.785560146	1.26E-05	down in d0 cTfh
ENSG00000224208	AL590762.6	-0.736661569	0.028970335	up in d7 cTfh
ENSG00000147162	OGT	-0.795900971	0.000345807	up in d7 cTfh
ENSG00000204131	NHSL2	2.190100196	1.59E-06	down in d0 cTfh
ENSG00000173198	CYSLTR1	1.891531906	0.000151683	down in d0 cTfh
ENSG00000078596	ITM2A	-1.062929699	1.60E-06	up in d7 cTfh
ENSG00000198932	GPRASP1	1.695328288	0.000634187	down in d0 cTfh
ENSG00000226241	LL0XNC01-221F2.2	0.917025041	0.017111686	down in d0 cTfh
ENSG00000157514	TSC22D3	0.953189236	2.09E-06	down in d0 cTfh
ENSG00000175556	LONRF3	1.617336419	0.004452782	down in d0 cTfh
ENSG00000125354	Sep-06	-0.776296083	0.000119567	up in d7 cTfh
ENSG00000183918	SH2D1A	-1.051990845	1.24E-05	up in d7 cTfh
ENSG00000221930	FAM45BP	-1.138848724	0.000972283	up in d7 cTfh
ENSG00000219507	FTH1P8	1.408644314	1.44E-07	down in d0 cTfh
ENSG00000155966	AFF2	-1.276595185	0.011987706	up in d7 cTfh
ENSG00000010404	IDS	0.514851429	0.000610956	down in d0 cTfh
ENSG00000029993	HMGB3	-1.103933043	0.099377223	up in d7 cTfh
ENSG00000067840	PDZD4	1.123554013	0.00473136	down in d0 cTfh
ENSG00000184844	CYCSP45	0.849421795	1.01E-05	down in d0 cTfh
ENSG00000196976	LAGE3	-0.678179768	0.013705754	up in d7 cTfh
ENSG00000147408	CSGALNACT1	1.790131728	7.22E-05	down in d0 cTfh
ENSG00000158856	DMTN	1.196535325	0.091617457	down in d0 cTfh
ENSG00000120889	TNFRSF10B	0.957838173	0.047315824	down in d0 cTfh
ENSG00000120875	DUSP4	-0.786322147	0.084943798	up in d7 cTfh
ENSG00000226098	SEC11B	-1.085363627	0.000534453	up in d7 cTfh
ENSG00000198363	ASPH	1.492790847	0.030279138	down in d0 cTfh
ENSG00000253919	THAP12P7	0.650746488	0.072001847	down in d0 cTfh
ENSG00000076554	TPD52	1.019279478	0.004223357	down in d0 cTfh
ENSG00000076641	PAG1	0.591352235	0.019770585	down in d0 cTfh
ENSG00000164687	FABP5	-1.321916414	2.12E-05	up in d7 cTfh
ENSG00000104325	DECR1	-1.106139965	1.62E-09	up in d7 cTfh
ENSG00000253738	OTUD6B-AS1	0.657107003	0.065635289	down in d0 cTfh
ENSG00000164919	COX6C	-0.650340225	0.000711722	up in d7 cTfh
ENSG00000147669	POLR2K	0.708161434	0.005702734	down in d0 cTfh
ENSG00000034677	RNF19A	-1.389618223	2.12E-09	up in d7 cTfh
ENSG00000253824	KB-173C10.2	-0.79153278	0.004372069	up in d7 cTfh
ENSG00000254364	KB-1615E4.3	-1.136208311	0.068116561	up in d7 cTfh
ENSG00000155090	KLF10	0.724173418	0.014126361	down in d0 cTfh
ENSG00000104447	TRPS1	-1.076672021	0.002462068	up in d7 cTfh
ENSG00000147684	NDUFB9	-0.696748528	7.89E-06	up in d7 cTfh
ENSG00000249859	PVT1	-0.813777652	0.057360618	up in d7 cTfh
ENSG00000105339	DENND3	2.176977515	3.86E-07	down in d0 cTfh
ENSG00000167702	KIFC2	1.011115929	0.030355792	down in d0 cTfh
ENSG00000196150	ZNF250	1.552118027	0.002004569	down in d0 cTfh
ENSG00000147872	PLIN2	-0.983350047	0.000120998	up in d7 cTfh
ENSG00000147889	CDKN2A	-1.595134785	0.014682295	up in d7 cTfh
ENSG00000137133	HINT2	-1.116186406	3.64E-06	up in d7 cTfh
ENSG00000135046	ANXA1	0.887780269	1.43E-06	down in d0 cTfh
ENSG00000083223	ZCCHC6	-0.790761997	0.001985636	up in d7 cTfh
ENSG00000157303	SUSD3	-0.876060718	0.007268692	up in d7 cTfh
ENSG00000131669	NINJ1	0.543182203	0.069061881	down in d0 cTfh
ENSG00000158122	AAED1	0.595116966	0.002068744	down in d0 cTfh
ENSG00000136938	ANP32B	-0.783896679	7.07E-05	up in d7 cTfh
ENSG00000119326	CTNNAL1	-1.226821135	0.017922549	up in d7 cTfh
ENSG00000095397	WHRN	1.491378248	8.06E-05	down in d0 cTfh
ENSG00000171159	C9orf16	-0.86581115	6.61E-05	up in d7 cTfh
ENSG00000119335	SET	-0.604395103	8.54E-05	up in d7 cTfh
ENSG00000176101	SSNA1	-0.746167867	0.013336333	up in d7 cTfh
ENSG00000142102	PGGHG	1.215485449	0.001767408	down in d0 cTfh
ENSG00000185885	IFITM1	-0.519117196	0.034266555	up in d7 cTfh
ENSG00000177156	TALDO1	-0.59300387	0.078868346	up in d7 cTfh
ENSG00000184545	DUSP8	1.519711906	0.000158775	down in d0 cTfh
ENSG00000214026	MRPL23	-0.597387692	0.085711522	up in d7 cTfh
ENSG00000181649	PHLDA2	2.420063113	3.08E-07	down in d0 cTfh
ENSG00000205531	NAP1L4	-0.832136433	0.000354211	up in d7 cTfh
ENSG00000166337	TAF10	-0.731061307	0.000530749	up in d7 cTfh
ENSG00000166387	PPFIBP2	1.932986727	0.000440121	down in d0 cTfh
ENSG00000133812	SBF2	1.227996584	0.016050951	down in d0 cTfh
ENSG00000179119	SPTY2D1	0.552085992	0.098674118	down in d0 cTfh
ENSG00000257043	RP11-137N23.1	0.893929295	0.001418596	up in d7 cTfh
ENSG00000198168	SVIP	0.896127052	0.001194223	down in d0 cTfh
ENSG00000149177	PTPRJ	-0.981895249	0.005702734	up in d7 cTfh
ENSG00000156587	UBE2L6	-0.964073026	1.86E-05	up in d7 cTfh
ENSG00000211450	C11orf31	-0.510424934	0.019770585	up in d7 cTfh
ENSG00000166900	STX3	1.333490437	0.054454686	down in d0 cTfh
ENSG00000234964	FABP5P7	-1.305407573	8.03E-06	up in d7 cTfh
ENSG00000013725	CD6	-0.875398851	0.003259336	up in d7 cTfh
ENSG00000110448	CD5	-1.02780408	6.47E-05	up in d7 cTfh
ENSG00000124942	AHNAK	0.776782813	9.84E-06	down in d0 cTfh
ENSG00000168569	TMEM223	-0.776578651	0.049987771	up in d7 cTfh
ENSG00000126432	PRDX5	-0.564337337	0.013531328	up in d7 cTfh
ENSG00000172543	CTSW	1.620691836	0.000479322	down in d0 cTfh
ENSG00000172500	FIBP	-0.711371285	0.035216395	up in d7 cTfh
ENSG00000258297	RP11-658F2.8	1.099069954	0.017172078	down in d0 cTfh
ENSG00000172531	PPP1CA	-1.235412454	6.51E-10	up in d7 cTfh
ENSG00000172725	CORO1B	-0.713152949	0.047568468	up in d7 cTfh
ENSG00000175567	UCP2	-0.676691836	0.003443186	up in d7 cTfh
ENSG00000137486	ARRB1	1.608627453	0.010850749	down in d0 cTfh
ENSG00000151366	NDUFC2	-0.80438504	2.70E-05	up in d7 cTfh
ENSG00000256745	RP11-680H20.1	-0.736598676	1.89E-05	up in d7 cTfh
ENSG00000187240	DYNC2H1	1.911370491	0.001593824	down in d0 cTfh
ENSG00000235505	RP11-693N9.2	-0.816425978	0.090383899	up in d7 cTfh
ENSG00000196954	CASP4	-0.565986408	0.030102226	up in d7 cTfh
ENSG00000109917	ZPR1	0.617602691	0.002607199	down in d0 cTfh
ENSG00000160593	JAML	0.967816646	0.006567257	down in d0 cTfh
ENSG00000167286	CD3D	-0.991267626	6.39E-09	up in d7 cTfh
ENSG00000160654	CD3G	-1.212956794	1.02E-06	up in d7 cTfh
ENSG00000095139	ARCN1	0.524216502	0.098920731	down in d0 cTfh
ENSG00000019144	PHLDB1	1.366144492	0.014044692	down in d0 cTfh
ENSG00000245869	RP11-158I9.5	-1.292110499	0.027333783	up in d7 cTfh
ENSG00000084234	APLP2	0.847279509	0.000148545	down in d0 cTfh
ENSG00000134460	IL2RA	1.728727595	0.001921356	down in d0 cTfh
ENSG00000123240	OPTN	-0.776765679	0.004813381	up in d7 cTfh
ENSG00000026025	VIM	0.99788161	4.75E-09	down in d0 cTfh
ENSG00000168283	BMI1	1.208173719	0.01023242	down in d0 cTfh
ENSG00000077420	APBB1IP	-0.608680113	0.003487355	up in d7 cTfh
ENSG00000197321	SVIL	1.536781503	1.14E-06	down in d0 cTfh
ENSG00000183621	ZNF438	1.19665215	0.032970941	down in d0 cTfh
ENSG00000198915	RASGEF1A	0.970220917	0.016210885	down in d0 cTfh
ENSG00000272430	RP11-38L15.8	0.704174475	0.021750724	down in d0 cTfh
ENSG00000229927	RHEBP1	1.020368495	0.002995777	down in d0 cTfh
ENSG00000226964	RHEBP2	0.919044382	0.000900637	down in d0 cTfh
ENSG00000204161	C10orf128	1.618490494	0.005662173	down in d0 cTfh
ENSG00000072401	UBE2D1	0.817700789	0.00018764	down in d0 cTfh
ENSG00000122872	ARL4AP1	1.762837992	0.000136068	down in d0 cTfh
ENSG00000138311	ZNF365	0.80848825	0.021365871	down in d0 cTfh
ENSG00000165732	DDX21	0.654627617	0.000496275	down in d0 cTfh
ENSG00000122884	P4HA1	0.80468489	0.053735671	down in d0 cTfh
ENSG00000138326	RPS24	-0.686760021	3.73E-07	up in d7 cTfh
ENSG00000108219	TSPAN14	-0.747751274	0.002949103	up in d7 cTfh
ENSG00000077150	NFKB2	0.920573756	0.000124612	down in d0 cTfh
ENSG00000171206	TRIM8	-1.414571339	5.70E-05	up in d7 cTfh
ENSG00000138166	DUSP5	-1.201372423	0.000103078	up in d7 cTfh
ENSG00000228169	PPIAP19	-1.546761618	0.004130825	up in d7 cTfh
ENSG00000228484	RP11-106M7.1	-1.838269398	0.013800942	up in d7 cTfh
ENSG00000151553	FAM160B1	-1.841460767	3.18E-05	up in d7 cTfh
ENSG00000119979	FAM45A	-1.267207896	2.72E-08	up in d7 cTfh
ENSG00000148908	RGS10	-0.706861692	0.003326998	up in d7 cTfh
ENSG00000066468	FGFR2	-1.553903389	5.27E-07	up in d7 cTfh
ENSG00000107679	PLEKHA1	1.172324249	0.000240076	down in d0 cTfh
ENSG00000065154	OAT	0.630751617	0.023407588	down in d0 cTfh
ENSG00000171813	PWWP2B	1.296457401	0.010645009	down in d0 cTfh
ENSG00000151651	ADAM8	1.617656342	1.28E-05	down in d0 cTfh
ENSG00000139193	CD27	-1.480984897	7.30E-09	up in d7 cTfh
ENSG00000111674	ENO2	1.381617033	0.000184782	down in d0 cTfh
ENSG00000272173	U47924.31	2.14397511	3.98E-05	down in d0 cTfh
ENSG00000178878	APOLD1	-1.515137981	0.000258546	up in d7 cTfh
ENSG00000134531	EMP1	2.735619109	1.14E-08	down in d0 cTfh
ENSG00000111348	ARHGDIB	-0.604431479	1.37E-05	up in d7 cTfh
ENSG00000151491	EPS8	1.010298122	0.077350201	down in d0 cTfh
ENSG00000250166	RP11-268P4.5	-1.288352705	3.77E-36	up in d7 cTfh
ENSG00000118308	LRMP	-1.755657709	3.67E-10	up in d7 cTfh
ENSG00000258449	RP11-713N11.4	-1.175366869	0.03726136	up in d7 cTfh
ENSG00000139168	ZCRB1	-0.827596422	0.000939335	up in d7 cTfh
ENSG00000184613	NELL2	1.487840993	0.001830033	down in d0 cTfh
ENSG00000134285	FKBP11	1.043230591	0.00466107	down in d0 cTfh
ENSG00000167553	TUBA1C	0.755567825	0.012552455	down in d0 cTfh
ENSG00000161835	GRASP	1.27016138	1.67E-07	down in d0 cTfh
ENSG00000257790	EIF4A1P4	0.796896651	0.013284461	down in d0 cTfh
ENSG00000161638	ITGA5	1.375750546	1.74E-05	down in d0 cTfh
ENSG00000196465	MYL6B	-1.878705922	0.000151204	up in d7 cTfh
ENSG00000139579	NABP2	-1.122505366	0.07782137	up in d7 cTfh
ENSG00000110944	IL23A	1.182877532	0.018436325	down in d0 cTfh
ENSG00000175197	DDIT3	0.806227222	0.002577731	down in d0 cTfh
ENSG00000139266	Mar-09	1.45563748	0.019655877	down in d0 cTfh
ENSG00000037897	METTL1	1.282087296	0.03095779	down in d0 cTfh
ENSG00000225422	RBMS1P1	0.908943816	0.017273171	down in d0 cTfh
ENSG00000111605	CPSF6	-0.595662735	0.075475902	up in d7 cTfh
ENSG00000139289	PHLDA1	1.267623915	9.36E-07	down in d0 cTfh
ENSG00000120833	SOCS2	1.380162202	0.023774313	down in d0 cTfh
ENSG00000057704	TMCC3	1.126470203	0.063624391	down in d0 cTfh
ENSG00000184752	NDUFA12	-0.965003154	0.000121196	up in d7 cTfh
ENSG00000166598	HSP90B1	0.717949858	2.01E-05	down in d0 cTfh
ENSG00000008405	CRY1	0.813534423	0.00655158	down in d0 cTfh
ENSG00000111229	ARPC3	-0.711972955	7.59E-06	up in d7 cTfh
ENSG00000186298	PPP1CC	-0.7628825	0.000134788	up in d7 cTfh
ENSG00000176871	WSB2	-0.861807326	0.064079618	up in d7 cTfh
ENSG00000150977	RILPL2	-0.809879663	0.000283779	up in d7 cTfh
ENSG00000184209	SNRNP35	-2.134825584	4.59E-16	up in d7 cTfh
ENSG00000256223	ZNF10	1.305495153	0.001853907	down in d0 cTfh
ENSG00000132963	POMP	-0.833128186	9.91E-06	up in d7 cTfh
ENSG00000238121	LINC00426	-1.531588155	0.005983413	up in d7 cTfh
ENSG00000229715	EEF1DP3	1.633041247	0.012930955	down in d0 cTfh
ENSG00000133104	SPG20	1.628219544	0.000214516	down in d0 cTfh
ENSG00000102760	RGCC	0.947249159	6.54E-05	down in d0 cTfh
ENSG00000133106	EPSTI1	-1.467393481	0.000439569	up in d7 cTfh
ENSG00000120675	DNAJC15	-0.586594487	0.073818392	up in d7 cTfh
ENSG00000230793	SMARCE1P5	-0.780180946	0.06893255	up in d7 cTfh
ENSG00000225131	PSME2P2	-0.521677793	0.055854059	up in d7 cTfh
ENSG00000102786	INTS6	0.732669942	0.000711722	down in d0 cTfh
ENSG00000139668	WDFY2	0.828818094	0.011776038	down in d0 cTfh
ENSG00000236044	FABP5P2	-1.186813693	0.000260981	up in d7 cTfh
ENSG00000236972	FABP5P1	-1.105215042	0.006171724	up in d7 cTfh
ENSG00000136111	TBC1D4	-1.633740633	3.04E-07	up in d7 cTfh
ENSG00000139793	MBNL2	0.674266626	0.033087541	down in d0 cTfh
ENSG00000134900	TPP2	-0.526503492	0.057543217	up in d7 cTfh
ENSG00000185950	IRS2	1.968406225	3.37E-14	down in d0 cTfh
ENSG00000198805	PNP	0.913899899	8.03E-06	down in d0 cTfh
ENSG00000277734	TRAC	-0.862720852	3.75E-08	up in d7 cTfh
ENSG00000129460	NGDN	0.508513061	0.024795868	down in d0 cTfh
ENSG00000092010	PSME1	-0.79514864	1.63E-06	up in d7 cTfh
ENSG00000100911	PSME2	-0.570176916	0.005204117	up in d7 cTfh
ENSG00000092330	TINF2	0.746766853	0.009481809	down in d0 cTfh
ENSG00000129518	EAPP	-0.902866175	1.56E-05	up in d7 cTfh
ENSG00000206596	RNU1-27P	1.22796872	0.0001505	down in d0 cTfh
ENSG00000100906	NFKBIA	1.081564636	3.24E-08	down in d0 cTfh
ENSG00000182107	TMEM30B	1.016386786	0.010667396	down in d0 cTfh
ENSG00000023608	SNAPC1	0.806455574	0.032914498	down in d0 cTfh
ENSG00000170345	FOS	1.864898985	2.56E-10	down in d0 cTfh
ENSG00000183648	NDUFB1	-0.689172981	0.000152528	up in d7 cTfh
ENSG00000100628	ASB2	-1.627324362	0.007122599	up in d7 cTfh
ENSG00000234648	AL162151.3	1.118617105	1.54E-07	down in d0 cTfh
ENSG00000258512	LINC00239	-1.552759659	0.00082946	up in d7 cTfh
ENSG00000156411	C14orf2	-0.512482909	0.005702734	up in d7 cTfh
ENSG00000182809	CRIP2	1.07801751	0.017153827	down in d0 cTfh
ENSG00000224078	SNHG14	1.147798324	0.009772886	down in d0 cTfh
ENSG00000182117	NOP10	-0.606182985	0.022829797	up in d7 cTfh
ENSG00000137804	NUSAP1	-1.809061582	7.42E-05	up in d7 cTfh
ENSG00000140264	SERF2	-0.522425202	0.00070475	up in d7 cTfh
ENSG00000069974	RAB27A	-1.116073411	3.67E-06	up in d7 cTfh
ENSG00000182718	ANXA2	0.579368273	0.049328783	down in d0 cTfh
ENSG00000259641	PCAT29	-1.292429975	0.01747609	up in d7 cTfh
ENSG00000259781	RP11-673C5.1	-1.034992377	2.24E-11	up in d7 cTfh
ENSG00000178741	COX5A	-0.733043724	0.001331491	up in d7 cTfh
ENSG00000214646	RP11-114H24.4	-1.232159328	0.040885151	up in d7 cTfh
ENSG00000041357	PSMA4	-0.680834311	0.006232188	up in d7 cTfh
ENSG00000103811	CTSH	2.55131092	5.42E-11	down in d0 cTfh
ENSG00000197696	NMB	-1.53425124	0.001988619	up in d7 cTfh
ENSG00000140612	SEC11A	-0.903215567	2.63E-07	up in d7 cTfh
ENSG00000073417	PDE8A	1.124302261	0.061199938	down in d0 cTfh
ENSG00000182768	NGRN	0.669361085	0.016939233	down in d0 cTfh
ENSG00000253954	HMGN1P38	-1.185282236	1.51E-05	up in d7 cTfh
ENSG00000258741	RP11-386M24.4	-0.807213925	0.000314722	up in d7 cTfh
ENSG00000259706	HSP90B2P	0.827000566	2.27E-05	down in d0 cTfh
ENSG00000103202	NME4	1.768054079	0.00082409	down in d0 cTfh
ENSG00000140983	RHOT2	0.842224261	0.009383433	down in d0 cTfh
ENSG00000260807	RP11-161M6.2	1.277227928	0.060171901	up in d7 cTfh
ENSG00000219274	RPS20P2	1.015140883	5.21E-08	down in d0 cTfh
ENSG00000074071	MRPS34	-0.908973073	0.000898851	up in d7 cTfh
ENSG00000140990	NDUFB10	-1.011386218	9.56E-07	up in d7 cTfh
ENSG00000103363	TCEB2	-0.539982621	0.002068744	up in d7 cTfh
ENSG00000103145	HCFC1R1	-0.598712017	0.099023318	up in d7 cTfh
ENSG00000008517	IL32	-1.093606512	3.70E-06	up in d7 cTfh
ENSG00000153048	CARHSP1	-0.812968063	0.085503928	up in d7 cTfh
ENSG00000103429	BFAR	-0.617431306	0.084536033	up in d7 cTfh
ENSG00000185864	NPIPB4	-0.523743933	0.022829797	up in d7 cTfh
ENSG00000140740	UQCRC2	-1.1170875	9.29E-09	up in d7 cTfh
ENSG00000260727	SLC7A5P1	1.136541926	0.035054525	down in d0 cTfh
ENSG00000149923	PPP4C	-0.784261469	0.000679324	up in d7 cTfh
ENSG00000090238	YPEL3	-0.755655737	3.21E-06	up in d7 cTfh
ENSG00000180096	Sep-01	-0.885279346	0.00287509	up in d7 cTfh
ENSG00000155330	C16orf87	-1.253586695	0.00024091	up in d7 cTfh
ENSG00000102921	N4BP1	-0.920855345	2.13E-05	up in d7 cTfh
ENSG00000125148	MT2A	-0.874602521	0.001098636	up in d7 cTfh
ENSG00000169715	MT1E	-2.174451329	7.87E-05	up in d7 cTfh
ENSG00000198417	MT1F	-1.89987041	0.000643543	up in d7 cTfh
ENSG00000051108	HERPUD1	0.618723108	0.010134518	down in d0 cTfh
ENSG00000168286	THAP11	0.875500009	0.062330434	down in d0 cTfh
ENSG00000181019	NQO1	-1.151231863	0.024829577	up in d7 cTfh
ENSG00000157349	DDX19B	-0.567805276	0.074679431	up in d7 cTfh
ENSG00000153774	CFDP1	-0.612799814	0.046561947	up in d7 cTfh
ENSG00000178573	MAF	-2.091624249	1.87E-14	up in d7 cTfh
ENSG00000103187	COTL1	-0.78610867	0.000300809	up in d7 cTfh
ENSG00000141002	TCF25	0.633688222	0.00054949	down in d0 cTfh
ENSG00000244097	RPS4XP17	0.894504795	0.024172661	down in d0 cTfh
ENSG00000108953	YWHAE	-0.576866893	0.002619652	up in d7 cTfh
ENSG00000083457	ITGAE	-0.860205763	0.002801769	up in d7 cTfh
ENSG00000108523	RNF167	-0.737285614	0.061212569	up in d7 cTfh
ENSG00000108518	PFN1	-1.031784247	4.16E-07	up in d7 cTfh
ENSG00000205544	TMEM256	-0.936844766	0.002513752	up in d7 cTfh
ENSG00000252835	SCARNA21	2.441701786	1.80E-08	down in d0 cTfh
ENSG00000170043	TRAPPC1	-0.823378235	0.001159754	up in d7 cTfh
ENSG00000125434	SLC25A35	-1.292048224	0.017273928	up in d7 cTfh
ENSG00000007237	GAS7	1.980359691	0.000140044	down in d0 cTfh
ENSG00000109083	IFT20	-0.783401456	0.009711015	up in d7 cTfh
ENSG00000108578	BLMH	-1.046818046	0.081902945	up in d7 cTfh
ENSG00000185862	EVI2B	-0.988927652	1.85E-05	up in d7 cTfh
ENSG00000271503	CCL5	1.16823851	0.023774313	down in d0 cTfh
ENSG00000277791	PSMB3	-0.620343991	0.007481226	up in d7 cTfh
ENSG00000131759	RARA	0.66788191	0.019130968	down in d0 cTfh
ENSG00000131747	TOP2A	-1.337060541	0.035341557	up in d7 cTfh
ENSG00000266088	RP5-1028K7.2	-2.786604053	1.17E-06	up in d7 cTfh
ENSG00000159111	MRPL10	-1.278608677	0.000152772	up in d7 cTfh
ENSG00000198740	ZNF652	1.376024815	0.000873716	down in d0 cTfh
ENSG00000141232	TOB1	0.733116085	0.001545828	down in d0 cTfh
ENSG00000229590	MSX2P1	0.916522367	0.073241468	down in d0 cTfh
ENSG00000136490	LIMD2	-1.001216931	2.64E-07	up in d7 cTfh
ENSG00000178607	ERN1	1.504036274	1.91E-06	down in d0 cTfh
ENSG00000168646	AXIN2	1.364258228	0.040197236	down in d0 cTfh
ENSG00000267023	LRRC37A16P	0.801777644	0.022044787	down in d0 cTfh
ENSG00000141576	RNF157	1.824488755	0.001454548	down in d0 cTfh
ENSG00000184640	Sep-09	-0.858760464	0.001449359	up in d7 cTfh
ENSG00000176845	METRNL	1.571291019	6.86E-06	down in d0 cTfh
ENSG00000207034	Y_RNA	1.032098025	0.024799079	down in d0 cTfh
ENSG00000177426	TGIF1	1.004180749	0.00176931	down in d0 cTfh
ENSG00000264745	TTC39C-AS1	1.080930473	0.054843968	down in d0 cTfh
ENSG00000101665	SMAD7	1.058333029	0.000728826	down in d0 cTfh
ENSG00000267322	SNHG22	2.63087952	4.10E-12	down in d0 cTfh
ENSG00000049759	NEDD4L	1.740251182	0.007093424	down in d0 cTfh
ENSG00000171791	BCL2	1.017764643	0.000262755	down in d0 cTfh
ENSG00000088832	FKBP1A	-0.680145911	0.00995194	up in d7 cTfh
ENSG00000101224	CDC25B	-0.934254081	0.008205583	up in d7 cTfh
ENSG00000182621	PLCB1	1.2796514	0.025212957	down in d0 cTfh
ENSG00000101230	ISM1	1.128300092	4.37E-05	down in d0 cTfh
ENSG00000132661	NXT1	1.091094346	3.93E-06	down in d0 cTfh
ENSG00000149531	FRG1BP	-0.880942666	0.027007559	up in d7 cTfh
ENSG00000125970	RALY	-0.723800636	0.000449613	up in d7 cTfh
ENSG00000124191	TOX2	-2.349573254	6.34E-05	up in d7 cTfh
ENSG00000241229	RN7SL443P	-1.307143493	0.07523676	up in d7 cTfh
ENSG00000166913	YWHAB	-0.836737831	1.48E-10	up in d7 cTfh
ENSG00000278231	RP5-906C1.1	-1.259757206	0.005520275	up in d7 cTfh
ENSG00000124097	HMGB1P1	-0.517939155	0.045166048	up in d7 cTfh
ENSG00000124172	ATP5E	-0.759149429	5.95E-05	up in d7 cTfh
ENSG00000124203	ZNF831	-0.948206763	0.001364208	up in d7 cTfh
ENSG00000101193	GID8	-0.665045668	0.098920731	up in d7 cTfh
ENSG00000232442	CTD-3184A7.4	-0.898867965	0.004202865	up in d7 cTfh
ENSG00000070388	FGF22	-1.198524993	0.04739266	up in d7 cTfh
ENSG00000064666	CNN2	-1.317138132	3.14E-07	up in d7 cTfh
ENSG00000099624	ATP5D	-0.510458773	0.014469938	up in d7 cTfh
ENSG00000099800	TIMM13	-0.674015275	0.045896125	up in d7 cTfh
ENSG00000099860	GADD45B	0.557267204	0.029895856	down in d0 cTfh
ENSG00000183617	MRPL54	-0.549125451	0.011811658	up in d7 cTfh
ENSG00000130254	SAFB2	0.519572086	0.070984666	down in d0 cTfh
ENSG00000174886	NDUFA11	-0.857994439	3.49E-06	up in d7 cTfh
ENSG00000267589	CTC-232P5.4	1.730267305	1.36E-05	down in d0 cTfh
ENSG00000229833	PET100	-0.752858379	4.16E-05	up in d7 cTfh
ENSG00000185236	RAB11B	-0.527333405	0.077355063	up in d7 cTfh
ENSG00000099785	Mar-02	-0.907531934	0.058304517	up in d7 cTfh
ENSG00000167815	PRDX2	-0.653860487	0.003575086	up in d7 cTfh
ENSG00000179218	CALR	0.577909027	0.017893528	down in d0 cTfh
ENSG00000099795	NDUFB7	-0.73887302	0.002253206	up in d7 cTfh
ENSG00000214046	SMIM7	-0.650477833	0.016886121	up in d7 cTfh
ENSG00000130303	BST2	-0.821610603	0.007740791	up in d7 cTfh
ENSG00000130313	PGLS	-0.761766935	0.093324464	up in d7 cTfh
ENSG00000105639	JAK3	-1.01861066	3.32E-05	up in d7 cTfh
ENSG00000081665	ZNF506	1.609598222	9.91E-07	down in d0 cTfh
ENSG00000271109	CTC-523E23.11	-0.904682992	0.099655657	up in d7 cTfh
ENSG00000221946	FXYD7	0.936682684	0.098880729	down in d0 cTfh
ENSG00000126267	COX6B1	-0.570425085	0.002431671	up in d7 cTfh
ENSG00000011590	ZBTB32	-1.524066189	0.009214216	up in d7 cTfh
ENSG00000104823	ECH1	-0.708787447	0.000498994	up in d7 cTfh
ENSG00000130755	GMFG	-0.972173268	3.42E-10	up in d7 cTfh
ENSG00000128016	ZFP36	1.079174978	5.68E-10	down in d0 cTfh
ENSG00000239868	RN7SL34P	1.716401644	0.000965485	down in d0 cTfh
ENSG00000105722	ERF	1.019132225	0.094219121	down in d0 cTfh
ENSG00000105755	ETHE1	-0.983610699	0.042150199	up in d7 cTfh
ENSG00000007255	TRAPPC6A	-0.531594583	0.038975726	up in d7 cTfh
ENSG00000160014	CALM3	-0.874280943	0.000184603	up in d7 cTfh
ENSG00000042753	AP2S1	-1.174038343	2.91E-06	up in d7 cTfh
ENSG00000130748	TMEM160	-0.76849446	0.024339178	up in d7 cTfh
ENSG00000142230	SAE1	-1.20149557	0.000497477	up in d7 cTfh
ENSG00000087074	PPP1R15A	1.369014559	4.25E-07	down in d0 cTfh
ENSG00000142546	NOSIP	-1.177712704	5.52E-10	up in d7 cTfh
ENSG00000104951	IL4I1	2.34091	6.42E-06	down in d0 cTfh
ENSG00000131408	NR1H2	0.981389898	2.04E-05	down in d0 cTfh
ENSG00000179820	MYADM	1.501522639	1.86E-15	down in d0 cTfh
ENSG00000121413	ZSCAN18	1.388158032	0.016760163	down in d0 cTfh
ENSG00000240122	FABP5P11	-1.086121189	0.019133127	up in d7 cTfh
ENSG00000128185	DGCR6L	-0.690501314	0.004389521	up in d7 cTfh
ENSG00000183506	PI4KAP2	0.801713958	0.034721551	down in d0 cTfh
ENSG00000213707	HMGB1P10	-0.931903749	2.31E-07	up in d7 cTfh
ENSG00000100219	XBP1	1.060076823	3.32E-05	down in d0 cTfh
ENSG00000184076	UQCR10	-0.670316689	1.13E-05	up in d7 cTfh
ENSG00000198832	SELM	1.257463416	0.000201539	down in d0 cTfh
ENSG00000100348	TXN2	-0.753981005	0.005755807	up in d7 cTfh
ENSG00000128340	RAC2	-0.61631532	0.001168059	up in d7 cTfh
ENSG00000244509	APOBEC3C	-0.813807788	0.013406708	up in d7 cTfh
ENSG00000100316	RPL3	0.642188715	1.85E-10	down in d0 cTfh
ENSG00000239900	ADSL	-1.339882192	1.52E-07	up in d7 cTfh
ENSG00000214727	RPL5P35	1.857489558	0.001159829	down in d0 cTfh
ENSG00000154723	ATP5J	-0.823566695	0.000700271	up in d7 cTfh
ENSG00000159128	IFNGR2	2.232311424	1.71E-08	down in d0 cTfh
ENSG00000241837	ATP5O	-0.698771678	2.19E-06	up in d7 cTfh
ENSG00000237945	LINC00649	-1.053134942	0.028830587	up in d7 cTfh
ENSG00000173276	ZBTB21	0.599926844	0.097384691	down in d0 cTfh
ENSG00000160221	C21orf33	-0.939053883	0.003138754	up in d7 cTfh
ENSG00000183570	PCBP3	-1.168651043	0.047483958	up in d7 cTfh
ENSG00000198763	MT-ND2	1.521277892	5.63E-12	down in d0 cTfh
ENSG00000228253	MT-ATP8	1.044565415	4.39E-05	down in d0 cTfh
ENSG00000198899	MT-ATP6	0.869165576	0.000432708	down in d0 cTfh
ENSG00000198840	MT-ND3	1.189698916	1.62E-06	down in d0 cTfh
ENSG00000212907	MT-ND4L	1.393503297	2.45E-07	down in d0 cTfh
ENSG00000198886	MT-ND4	0.96284776	0.000225905	down in d0 cTfh
ENSG00000198786	MT-ND5	1.156464763	4.79E-10	down in d0 cTfh
ENSG00000198695	MT-ND6	1.260773636	6.01E-08	down in d0 cTfh
ENSG00000198727	MT-CYB	0.999733666	1.13E-05	down in d0 cTfh
