# Supplementary material for: Impaired HA-specific T follicular helper cell and antibody responses to influenza vaccination are linked to inflammation in humans
Source: eLife. 2021 Nov 2;10:e70554. doi: 10.7554/eLife.70554 (PMC8562996; doi:10.7554/eLife.70554)
Supplement: Source data 2. [file elife-70554-supp6.csv]

	gene	gene.sign
1	TNFRSF18	up in GC Tfh
2	DVL1	down in GC Tfh
3	SKI	down in GC Tfh
4	MEGF6	down in GC Tfh
5	PER3	down in GC Tfh
6	CA6	down in GC Tfh
7	GPR157	down in GC Tfh
8	DRAXIN	down in GC Tfh
9	DHRS3	down in GC Tfh
10	CASP9	up in GC Tfh
11	NBL1	down in GC Tfh
12	EIF4G3	up in GC Tfh
13	TCEA3	down in GC Tfh
14	ID3	up in GC Tfh
15	RCAN3	down in GC Tfh
16	RUNX3	down in GC Tfh
17	LDLRAP1	down in GC Tfh
18	MAN1C1	down in GC Tfh
19	KDF1	down in GC Tfh
20	SYTL1	down in GC Tfh
21	AZIN2	down in GC Tfh
22	CSMD2	down in GC Tfh
23	KIAA0319L	up in GC Tfh
24	MEAF6	up in GC Tfh
25	HEYL	up in GC Tfh
26	HPCAL4	down in GC Tfh
27	CITED4	down in GC Tfh
28	TMEM53	up in GC Tfh
29	C1orf228	up in GC Tfh
30	PIK3R3	up in GC Tfh
31	LRP8	up in GC Tfh
32	DAB1-AS1	up in GC Tfh
33	NFIA	up in GC Tfh
34	PATJ	down in GC Tfh
35	PDE4B	down in GC Tfh
36	IL23R	down in GC Tfh
37	DIRAS3	up in GC Tfh
38	ST6GALNAC3	up in GC Tfh
39	AK5	down in GC Tfh
40	SYDE2	down in GC Tfh
41	LMO4	down in GC Tfh
42	EVI5	up in GC Tfh
43	CCDC18-AS1	up in GC Tfh
44	FNBP1L	down in GC Tfh
45	CNN3	down in GC Tfh
46	CDC14A	down in GC Tfh
47	RP4-575N6.4	down in GC Tfh
48	S1PR1	down in GC Tfh
49	RP4-575N6.5	down in GC Tfh
50	VAV3	up in GC Tfh
51	KIAA1324	up in GC Tfh
52	AMPD2	down in GC Tfh
53	GSTM2	down in GC Tfh
54	GSTM3	down in GC Tfh
55	KCNA2	down in GC Tfh
56	RP11-284N8.3	down in GC Tfh
57	KCNA3	down in GC Tfh
58	CHI3L2	up in GC Tfh
59	RHOC	up in GC Tfh
60	TSHB	down in GC Tfh
61	IGSF3	up in GC Tfh
62	RP11-763B22.4	down in GC Tfh
63	NBPF15	down in GC Tfh
64	RP11-89F3.2	down in GC Tfh
65	ANKRD35	up in GC Tfh
66	TXNIP	down in GC Tfh
67	NOTCH2NL	down in GC Tfh
68	LINC00869	down in GC Tfh
69	MLLT11	down in GC Tfh
70	TUFT1	down in GC Tfh
71	RP11-74C1.2	down in GC Tfh
72	THEM4	down in GC Tfh
73	S100A10	down in GC Tfh
74	S100A6	down in GC Tfh
75	ATP8B2	down in GC Tfh
76	IL6R	up in GC Tfh
77	RP11-307C12.13	down in GC Tfh
78	TRIM46	down in GC Tfh
79	SEMA4A	down in GC Tfh
80	SH2D2A	down in GC Tfh
81	ARHGEF11	down in GC Tfh
82	PYHIN1	up in GC Tfh
83	FCRL6	up in GC Tfh
84	SLAMF6	up in GC Tfh
85	SLAMF1	down in GC Tfh
86	CD48	down in GC Tfh
87	RP11-312J18.5	up in GC Tfh
88	FCER1G	down in GC Tfh
89	ILDR2	up in GC Tfh
90	RP3-455J7.4	down in GC Tfh
91	GPR161	down in GC Tfh
92	TNR	up in GC Tfh
93	GLUL	down in GC Tfh
94	RGS16	down in GC Tfh
95	RP4-635A23.6	down in GC Tfh
96	RGS13	up in GC Tfh
97	CFH	down in GC Tfh
98	KDM5B	up in GC Tfh
99	TMCC2	up in GC Tfh
100	RAB29	down in GC Tfh
101	PFKFB2	down in GC Tfh
102	CD55	down in GC Tfh
103	RP11-357P18.2	down in GC Tfh
104	CR2	down in GC Tfh
105	CR1	down in GC Tfh
106	SERTAD4	up in GC Tfh
107	NEK2	up in GC Tfh
108	PTPN14	up in GC Tfh
109	CENPF	up in GC Tfh
110	C1orf115	down in GC Tfh
111	CAPN2	down in GC Tfh
112	CNIH3	up in GC Tfh
113	RP11-285F7.2	down in GC Tfh
114	TMEM63A	down in GC Tfh
115	LIN9	up in GC Tfh
116	SNAP47	up in GC Tfh
117	C1orf198	up in GC Tfh
118	SIPA1L2	up in GC Tfh
119	KCNK1	up in GC Tfh
120	GNG4	up in GC Tfh
121	RP11-365D9.1	up in GC Tfh
122	GPR137B	up in GC Tfh
123	WDR64	down in GC Tfh
124	AKT3	down in GC Tfh
125	SCCPDH	up in GC Tfh
126	NLRP3	down in GC Tfh
127	RNF144A-AS1	down in GC Tfh
128	RNF144A	down in GC Tfh
129	AC019048.1	down in GC Tfh
130	KLF11	down in GC Tfh
131	ATP6V1C2	up in GC Tfh
132	FOSL2	down in GC Tfh
133	PLB1	down in GC Tfh
134	SPDYA	down in GC Tfh
135	CRIM1	up in GC Tfh
136	PRKD3	down in GC Tfh
137	AC006369.2	down in GC Tfh
138	CDC42EP3	down in GC Tfh
139	HNRNPLL	up in GC Tfh
140	THADA	up in GC Tfh
141	B3GNT2	up in GC Tfh
142	CEP68	down in GC Tfh
143	AAK1	down in GC Tfh
144	TGFA	down in GC Tfh
145	ACTG2	up in GC Tfh
146	HK2	down in GC Tfh
147	TRABD2A	down in GC Tfh
148	TMSB10	down in GC Tfh
149	IGKV3OR2-268	up in GC Tfh
150	ANKRD36BP2	down in GC Tfh
151	IGKV3D-7	up in GC Tfh
152	MAL	down in GC Tfh
153	SEMA4C	down in GC Tfh
154	INPP4A	down in GC Tfh
155	MGAT4A	down in GC Tfh
156	KIAA1211L	down in GC Tfh
157	LONRF2	up in GC Tfh
158	NPAS2	up in GC Tfh
159	RFX8	up in GC Tfh
160	LINC01102	up in GC Tfh
161	CD8BP	up in GC Tfh
162	LIMS1	up in GC Tfh
163	LIMS3	up in GC Tfh
164	MIR4435-2HG	up in GC Tfh
165	AC017002.1	up in GC Tfh
166	AC079922.3	down in GC Tfh
167	CKAP2L	up in GC Tfh
168	LIMS2	up in GC Tfh
169	SPOPL	up in GC Tfh
170	RP11-570L15.1	down in GC Tfh
171	GTDC1	up in GC Tfh
172	ZEB2	up in GC Tfh
173	RP11-107E5.3	up in GC Tfh
174	AC105402.4	down in GC Tfh
175	KIF5C	down in GC Tfh
176	ACVR1C	down in GC Tfh
177	BAZ2B	up in GC Tfh
178	RBMS1	down in GC Tfh
179	SLC4A10	down in GC Tfh
180	DPP4	down in GC Tfh
181	AC008063.2	down in GC Tfh
182	COBLL1	up in GC Tfh
183	STK39	up in GC Tfh
184	CYBRD1	up in GC Tfh
185	ITGA6	down in GC Tfh
186	GPR155	down in GC Tfh
187	PDE11A	down in GC Tfh
188	UBE2E3	up in GC Tfh
189	NCKAP1	up in GC Tfh
190	ITGAV	up in GC Tfh
191	INPP1	up in GC Tfh
192	NAB1	up in GC Tfh
193	PLCL1	down in GC Tfh
194	FTCDNL1	down in GC Tfh
195	SPATS2L	up in GC Tfh
196	SGO2	up in GC Tfh
197	AC007163.3	down in GC Tfh
198	CASP10	down in GC Tfh
199	CTLA4	up in GC Tfh
200	ADAM23	down in GC Tfh
201	FN1	down in GC Tfh
202	TMBIM1	down in GC Tfh
203	EPHA4	down in GC Tfh
204	SGPP2	up in GC Tfh
205	SERPINE2	up in GC Tfh
206	COL4A3	down in GC Tfh
207	AGFG1	up in GC Tfh
208	CCL20	down in GC Tfh
209	SLC16A14	up in GC Tfh
210	AC073254.1	down in GC Tfh
211	DGKD	down in GC Tfh
212	AC097713.4	down in GC Tfh
213	ARL4C	down in GC Tfh
214	GPR35	down in GC Tfh
215	PDCD1	up in GC Tfh
216	IL5RA	down in GC Tfh
217	BHLHE40	down in GC Tfh
218	SRGAP3	up in GC Tfh
219	IQSEC1	down in GC Tfh
220	WNT7A	down in GC Tfh
221	LINC01267	up in GC Tfh
222	PLCL2	up in GC Tfh
223	SATB1	down in GC Tfh
224	SATB1-AS1	down in GC Tfh
225	NR1D2	down in GC Tfh
226	NEK10	up in GC Tfh
227	EOMES	up in GC Tfh
228	GPD1L	down in GC Tfh
229	STAC	up in GC Tfh
230	CTDSPL	down in GC Tfh
231	VIPR1	down in GC Tfh
232	VIPR1-AS1	down in GC Tfh
233	NBEAL2	down in GC Tfh
234	U73166.2	down in GC Tfh
235	CISH	down in GC Tfh
236	MAPKAPK3	up in GC Tfh
237	PPM1M	up in GC Tfh
238	FAM19A1	down in GC Tfh
239	FAM172BP	down in GC Tfh
240	CBLB	up in GC Tfh
241	NECTIN3	down in GC Tfh
242	CD96	down in GC Tfh
243	RP11-402J7.2	down in GC Tfh
244	C3orf52	down in GC Tfh
245	GCSAM	down in GC Tfh
246	CD200	up in GC Tfh
247	BTLA	up in GC Tfh
248	RP11-553L6.2	up in GC Tfh
249	TIGIT	up in GC Tfh
250	ZBTB20-AS1	up in GC Tfh
251	CD80	up in GC Tfh
252	PARP15	down in GC Tfh
253	KALRN	down in GC Tfh
254	BFSP2	up in GC Tfh
255	TRPC1	down in GC Tfh
256	SLC9A9	up in GC Tfh
257	PLSCR1	up in GC Tfh
258	GPR171	down in GC Tfh
259	MME	up in GC Tfh
260	LINC00886	down in GC Tfh
261	LINC00881	up in GC Tfh
262	GPR160	down in GC Tfh
263	LINC01206	down in GC Tfh
264	B3GNT5	up in GC Tfh
265	MAP3K13	down in GC Tfh
266	DGKG	up in GC Tfh
267	RPL39L	up in GC Tfh
268	BCL6	up in GC Tfh
269	P3H2	up in GC Tfh
270	CLDN1	up in GC Tfh
271	CCDC50	up in GC Tfh
272	HES1	up in GC Tfh
273	FAM43A	up in GC Tfh
274	XXYLT1	up in GC Tfh
275	XXYLT1-AS2	up in GC Tfh
276	CPLX1	down in GC Tfh
277	MXD4	up in GC Tfh
278	ZFYVE28	down in GC Tfh
279	NSG1	down in GC Tfh
280	EVC2	up in GC Tfh
281	CLNK	up in GC Tfh
282	ARAP2	up in GC Tfh
283	RP11-431M7.3	up in GC Tfh
284	DTHD1	up in GC Tfh
285	C4orf19	down in GC Tfh
286	LINC01259	down in GC Tfh
287	KLF3	down in GC Tfh
288	SMIM14	down in GC Tfh
289	APBB2	up in GC Tfh
290	UCHL1	up in GC Tfh
291	LIMCH1	up in GC Tfh
292	ATP8A1	up in GC Tfh
293	TXK	down in GC Tfh
294	CLOCK	down in GC Tfh
295	RN7SKP30	down in GC Tfh
296	RP11-584P21.2	down in GC Tfh
297	SULT1B1	down in GC Tfh
298	RASSF6	down in GC Tfh
299	CDKL2	up in GC Tfh
300	CXCL13	up in GC Tfh
301	BMP2K	up in GC Tfh
302	PLAC8	down in GC Tfh
303	GPAT3	down in GC Tfh
304	PTPN13	up in GC Tfh
305	C4orf36	down in GC Tfh
306	ABCG2	down in GC Tfh
307	HERC5	down in GC Tfh
308	HPGDS	up in GC Tfh
309	TSPAN5	up in GC Tfh
310	PPP3CA	down in GC Tfh
311	SLC39A8	down in GC Tfh
312	CENPE	up in GC Tfh
313	TET2	up in GC Tfh
314	SGMS2	up in GC Tfh
315	LEF1	down in GC Tfh
316	LEF1-AS1	down in GC Tfh
317	TIFA	up in GC Tfh
318	IL21	up in GC Tfh
319	IL21-AS1	up in GC Tfh
320	MGST2	up in GC Tfh
321	IL15	down in GC Tfh
322	SMAD1	up in GC Tfh
323	ZNF827	up in GC Tfh
324	NR3C2	down in GC Tfh
325	RP11-18H21.1	up in GC Tfh
326	TRIM2	down in GC Tfh
327	MND1	up in GC Tfh
328	GUCY1B3	up in GC Tfh
329	WDR17	down in GC Tfh
330	WWC2	down in GC Tfh
331	SLC25A4	down in GC Tfh
332	TLR3	down in GC Tfh
333	SLC12A7	down in GC Tfh
334	SEMA5A	down in GC Tfh
335	FTH1P10	down in GC Tfh
336	SPEF2	down in GC Tfh
337	IL7R	down in GC Tfh
338	PARP8	down in GC Tfh
339	ITGA1	down in GC Tfh
340	SGTB	down in GC Tfh
341	MAST4	down in GC Tfh
342	PIK3R1	down in GC Tfh
343	FAM169A	down in GC Tfh
344	ZBED3	down in GC Tfh
345	HOMER1	down in GC Tfh
346	CTC-428H11.2	down in GC Tfh
347	MCTP1	up in GC Tfh
348	GPR150	down in GC Tfh
349	ERAP2	down in GC Tfh
350	FER	down in GC Tfh
351	SLC25A46	up in GC Tfh
352	CAMK4	down in GC Tfh
353	STARD4	down in GC Tfh
354	CCDC112	down in GC Tfh
355	GRAMD3	up in GC Tfh
356	ALDH7A1	down in GC Tfh
357	IL4	up in GC Tfh
358	TGFBI	up in GC Tfh
359	EGR1	down in GC Tfh
360	TMEM173	down in GC Tfh
361	CXXC5	up in GC Tfh
362	HBEGF	down in GC Tfh
363	VTRNA1-3	down in GC Tfh
364	CTD-2024I7.13	down in GC Tfh
365	NR3C1	up in GC Tfh
366	SMIM3	down in GC Tfh
367	IRGM	down in GC Tfh
368	TIMD4	down in GC Tfh
369	PTTG1	up in GC Tfh
370	MIR3142HG	up in GC Tfh
371	SFXN1	up in GC Tfh
372	HRH2	down in GC Tfh
373	FAM153B	down in GC Tfh
374	PRR7	down in GC Tfh
375	FAM153A	down in GC Tfh
376	FAM153C	down in GC Tfh
377	RNF130	down in GC Tfh
378	SCGB3A1	up in GC Tfh
379	RP11-532F6.3	down in GC Tfh
380	TUBB2A	down in GC Tfh
381	TUBB2BP1	down in GC Tfh
382	RNA5SP202	down in GC Tfh
383	GCNT2	up in GC Tfh
384	GFOD1	up in GC Tfh
385	CD83	down in GC Tfh
386	RP3-448I9.2	up in GC Tfh
387	RP11-330A16.1	up in GC Tfh
388	RP11-146I2.1	up in GC Tfh
389	MYLIP	down in GC Tfh
390	ALDH5A1	up in GC Tfh
391	FAM65B	down in GC Tfh
392	ZNF204P	down in GC Tfh
393	RP1-313I6.12	down in GC Tfh
394	ZNF165	down in GC Tfh
395	GABBR1	down in GC Tfh
396	IER3	down in GC Tfh
397	LINC00243	down in GC Tfh
398	LTB	down in GC Tfh
399	LST1	down in GC Tfh
400	AIF1	down in GC Tfh
401	DDAH2	down in GC Tfh
402	TNXB	down in GC Tfh
403	HLA-DMA	up in GC Tfh
404	FKBP5	up in GC Tfh
405	ETV7	up in GC Tfh
406	STK38	down in GC Tfh
407	PI16	down in GC Tfh
408	KCNK5	up in GC Tfh
409	SLC29A1	up in GC Tfh
410	CD109	up in GC Tfh
411	MYO6	up in GC Tfh
412	RRAGD	down in GC Tfh
413	RP1-47M23.3	down in GC Tfh
414	SCML4	down in GC Tfh
415	FIG4	up in GC Tfh
416	SLC16A10	down in GC Tfh
417	WISP3	up in GC Tfh
418	FAM26F	down in GC Tfh
419	DCBLD1	up in GC Tfh
420	MAN1A1	up in GC Tfh
421	SMPDL3A	up in GC Tfh
422	TPD52L1	up in GC Tfh
423	NCOA7	up in GC Tfh
424	ARHGAP18	up in GC Tfh
425	EPB41L2	down in GC Tfh
426	VNN2	up in GC Tfh
427	AHI1	up in GC Tfh
428	PDE7B	up in GC Tfh
429	RP3-406A7.7	up in GC Tfh
430	MAP7	up in GC Tfh
431	RP11-356I2.4	down in GC Tfh
432	TNFAIP3	down in GC Tfh
433	PERP	down in GC Tfh
434	CCDC28A	up in GC Tfh
435	PHACTR2	up in GC Tfh
436	STX11	up in GC Tfh
437	PLEKHG1	up in GC Tfh
438	CNKSR3	up in GC Tfh
439	TIAM2	up in GC Tfh
440	ZDHHC14	down in GC Tfh
441	SYNJ2	down in GC Tfh
442	SYTL3	down in GC Tfh
443	SOD2	down in GC Tfh
444	MAP3K4	down in GC Tfh
445	AGPAT4	down in GC Tfh
446	AGPAT4-IT1	down in GC Tfh
447	PARK2	down in GC Tfh
448	CCR6	down in GC Tfh
449	DLL1	down in GC Tfh
450	PDGFA	up in GC Tfh
451	LFNG	down in GC Tfh
452	ZNF815P	down in GC Tfh
453	GLCCI1	up in GC Tfh
454	ICA1	up in GC Tfh
455	AC006042.6	up in GC Tfh
456	CTA-293F17.1	up in GC Tfh
457	ITGB8	up in GC Tfh
458	AC004540.5	up in GC Tfh
459	CHN2	up in GC Tfh
460	SUGCT	down in GC Tfh
461	MYO1G	down in GC Tfh
462	SNHG15	down in GC Tfh
463	IGFBP3	down in GC Tfh
464	UPP1	down in GC Tfh
465	C7orf72	up in GC Tfh
466	AC020743.2	up in GC Tfh
467	RP13-580B18.4	down in GC Tfh
468	STX1A	down in GC Tfh
469	GTF2IRD1	down in GC Tfh
470	NCF1C	down in GC Tfh
471	GSAP	down in GC Tfh
472	PHTF2	up in GC Tfh
473	CDK14	up in GC Tfh
474	AC002456.2	up in GC Tfh
475	TVP23CP1	up in GC Tfh
476	CDK6	up in GC Tfh
477	CASD1	up in GC Tfh
478	SGCE	up in GC Tfh
479	PEG10	up in GC Tfh
480	PON2	up in GC Tfh
481	SLC25A13	up in GC Tfh
482	ORAI2	down in GC Tfh
483	DPY19L2P2	down in GC Tfh
484	CTB-152G17.6	up in GC Tfh
485	RP11-667F14.1	down in GC Tfh
486	CAV1	up in GC Tfh
487	TSPAN12	up in GC Tfh
488	SND1-IT1	down in GC Tfh
489	AC016831.6	down in GC Tfh
490	PLXNA4	down in GC Tfh
491	ZC3HAV1	down in GC Tfh
492	TRBV5-1	up in GC Tfh
493	TRBV6-1	up in GC Tfh
494	TRBV4-2	up in GC Tfh
495	TRBV7-3	up in GC Tfh
496	TRBV12-4	up in GC Tfh
497	TRBV14	up in GC Tfh
498	EPHA1	down in GC Tfh
499	EPHA1-AS1	down in GC Tfh
500	GIMAP1	down in GC Tfh
501	KCNH2	down in GC Tfh
502	ATG9B	down in GC Tfh
503	PTPRN2	up in GC Tfh
504	VIPR2	up in GC Tfh
505	PRKX	down in GC Tfh
506	GS1-257G1.1	up in GC Tfh
507	SCML1	down in GC Tfh
508	CDKL5	down in GC Tfh
509	SMS	up in GC Tfh
510	PHEX	up in GC Tfh
511	GK	up in GC Tfh
512	LINC01281	up in GC Tfh
513	PLP2	down in GC Tfh
514	MAGED4B	down in GC Tfh
515	MAGED4	down in GC Tfh
516	MAGEH1	up in GC Tfh
517	RP13-188A5.1	up in GC Tfh
518	FAAH2	up in GC Tfh
519	EDA	down in GC Tfh
520	LINC00891	up in GC Tfh
521	NHSL2	down in GC Tfh
522	RGAG4	down in GC Tfh
523	TSIX	down in GC Tfh
524	KIAA2022	down in GC Tfh
525	ITM2A	up in GC Tfh
526	CENPI	up in GC Tfh
527	ARMCX7P	up in GC Tfh
528	ARMCX6	up in GC Tfh
529	RP1-232L22__B.1	up in GC Tfh
530	TCEAL2	down in GC Tfh
531	GPRASP1	down in GC Tfh
532	BEX3	down in GC Tfh
533	VSIG1	down in GC Tfh
534	PAK3	down in GC Tfh
535	PLS3	up in GC Tfh
536	RP13-192B19.2	up in GC Tfh
537	SH2D1A	up in GC Tfh
538	GPC3	down in GC Tfh
539	PHF6	up in GC Tfh
540	LINC00892	up in GC Tfh
541	AFF2	up in GC Tfh
542	HMGB3	up in GC Tfh
543	PDZD4	down in GC Tfh
544	FLNA	down in GC Tfh
545	GAB3	down in GC Tfh
546	RP11-148O21.6	up in GC Tfh
547	RP11-419I17.1	up in GC Tfh
548	RPS3AP34	up in GC Tfh
549	MTUS1	up in GC Tfh
550	CSGALNACT1	down in GC Tfh
551	LPL	up in GC Tfh
552	DOK2	down in GC Tfh
553	SORBS3	down in GC Tfh
554	EGR3	down in GC Tfh
555	TNFRSF10D	down in GC Tfh
556	NEFL	down in GC Tfh
557	DPYSL2	up in GC Tfh
558	FZD3	up in GC Tfh
559	DUSP4	up in GC Tfh
560	AC145110.1	up in GC Tfh
561	RAB11FIP1	up in GC Tfh
562	FGFR1	up in GC Tfh
563	PLEKHA2	down in GC Tfh
564	RP11-589C21.6	down in GC Tfh
565	RP11-589C21.5	down in GC Tfh
566	AP3M2	down in GC Tfh
567	TOX	up in GC Tfh
568	RP11-328K2.1	up in GC Tfh
569	RP11-25K19.1	up in GC Tfh
570	CA8	up in GC Tfh
571	CHD7	down in GC Tfh
572	RP11-33I11.2	down in GC Tfh
573	CYP7B1	up in GC Tfh
574	ADHFE1	up in GC Tfh
575	MYBL1	down in GC Tfh
576	RDH10	up in GC Tfh
577	GDAP1	up in GC Tfh
578	HEY1	up in GC Tfh
579	PAG1	down in GC Tfh
580	FABP5	up in GC Tfh
581	OSGIN2	up in GC Tfh
582	TMEM64	up in GC Tfh
583	FAM92A1	up in GC Tfh
584	GEM	up in GC Tfh
585	CCNE2	up in GC Tfh
586	TP53INP1	up in GC Tfh
587	CPQ	down in GC Tfh
588	MATN2	down in GC Tfh
589	NIPAL2	up in GC Tfh
590	SPAG1	up in GC Tfh
591	RNF19A	up in GC Tfh
592	KB-173C10.2	up in GC Tfh
593	KB-173C10.1	up in GC Tfh
594	KB-1615E4.2	up in GC Tfh
595	KB-1615E4.3	up in GC Tfh
596	NCALD	up in GC Tfh
597	KB-1980E6.3	up in GC Tfh
598	AZIN1-AS1	up in GC Tfh
599	LRP12	down in GC Tfh
600	TRPS1	up in GC Tfh
601	SNTB1	down in GC Tfh
602	TRIB1	up in GC Tfh
603	LINC00861	down in GC Tfh
604	FAM84B	down in GC Tfh
605	MYC	down in GC Tfh
606	ASAP1	up in GC Tfh
607	ST3GAL1	down in GC Tfh
608	FAM135B	down in GC Tfh
609	PTP4A3	down in GC Tfh
610	RP11-273G15.2	down in GC Tfh
611	EPPK1	down in GC Tfh
612	PLEC	down in GC Tfh
613	KANK1	down in GC Tfh
614	ERMP1	up in GC Tfh
615	ZDHHC21	up in GC Tfh
616	CNTLN	up in GC Tfh
617	CDKN2A	up in GC Tfh
618	AQP3	down in GC Tfh
619	ANXA2P2	down in GC Tfh
620	IL11RA	down in GC Tfh
621	FAM214B	down in GC Tfh
622	TPM2	down in GC Tfh
623	GLIPR2	down in GC Tfh
624	MELK	up in GC Tfh
625	TJP2	up in GC Tfh
626	ANXA1	down in GC Tfh
627	PCSK5	down in GC Tfh
628	GNAQ	down in GC Tfh
629	TLE1	down in GC Tfh
630	CTSL	down in GC Tfh
631	UNQ6494	up in GC Tfh
632	DIRAS2	up in GC Tfh
633	ABCA1	down in GC Tfh
634	TRIM32	up in GC Tfh
635	TPT1P9	down in GC Tfh
636	RPSAP76	down in GC Tfh
637	C9orf16	up in GC Tfh
638	LINC01503	up in GC Tfh
639	LINC00963	up in GC Tfh
640	POMT1	up in GC Tfh
641	DBH-AS1	up in GC Tfh
642	SARDH	up in GC Tfh
643	ASCL2	up in GC Tfh
644	KCNQ1	down in GC Tfh
645	KCNQ1OT1	down in GC Tfh
646	CDKN1C	down in GC Tfh
647	APBB1	down in GC Tfh
648	TPP1	up in GC Tfh
649	NRIP3	down in GC Tfh
650	SBF2	down in GC Tfh
651	TEAD1	up in GC Tfh
652	SPON1	down in GC Tfh
653	PDE3B	down in GC Tfh
654	NUCB2	up in GC Tfh
655	RP1-239B22.5	up in GC Tfh
656	KIF18A	up in GC Tfh
657	PRRG4	up in GC Tfh
658	RP1-68D18.4	down in GC Tfh
659	SLC1A2	down in GC Tfh
660	C11orf74	down in GC Tfh
661	C11orf96	up in GC Tfh
662	TSPAN18	down in GC Tfh
663	PHF21A	up in GC Tfh
664	PTPRJ	up in GC Tfh
665	SLC43A3	up in GC Tfh
666	FAM111B	up in GC Tfh
667	FABP5P7	up in GC Tfh
668	MS4A6A	up in GC Tfh
669	BEST1	down in GC Tfh
670	AHNAK	down in GC Tfh
671	PLCB3	down in GC Tfh
672	RASGRP2	down in GC Tfh
673	FOSL1	down in GC Tfh
674	ANKRD13D	down in GC Tfh
675	CORO1B	up in GC Tfh
676	GSTP1	down in GC Tfh
677	RP5-903G2.2	up in GC Tfh
678	TESMIN	down in GC Tfh
679	CCND1	up in GC Tfh
680	CTTN	up in GC Tfh
681	RNF121	up in GC Tfh
682	RP11-169D4.2	up in GC Tfh
683	STARD10	down in GC Tfh
684	ATG16L2	down in GC Tfh
685	PLEKHB1	down in GC Tfh
686	RP11-864N7.2	down in GC Tfh
687	GDPD5	down in GC Tfh
688	MYO7A	up in GC Tfh
689	RAB30	up in GC Tfh
690	SYTL2	down in GC Tfh
691	CCDC81	up in GC Tfh
692	SMCO4	up in GC Tfh
693	BIRC3	down in GC Tfh
694	RP11-693N9.2	up in GC Tfh
695	EXPH5	down in GC Tfh
696	POU2AF1	up in GC Tfh
697	C11orf1	down in GC Tfh
698	RP11-356J5.12	down in GC Tfh
699	ZBTB16	down in GC Tfh
700	BACE1	down in GC Tfh
701	TMPRSS4-AS1	down in GC Tfh
702	JAML	down in GC Tfh
703	BCL9L	down in GC Tfh
704	SC5D	down in GC Tfh
705	CRTAM	up in GC Tfh
706	RPS26P43	down in GC Tfh
707	ROBO3	down in GC Tfh
708	HYLS1	down in GC Tfh
709	ARHGAP32	down in GC Tfh
710	TMEM45B	down in GC Tfh
711	ST14	up in GC Tfh
712	JAM3	down in GC Tfh
713	B3GAT1	up in GC Tfh
714	IL15RA	down in GC Tfh
715	IL2RA	down in GC Tfh
716	PRKCQ-AS1	down in GC Tfh
717	RP11-554I8.1	down in GC Tfh
718	ECHDC3	down in GC Tfh
719	PROSER2	down in GC Tfh
720	PHYH	down in GC Tfh
721	FRMD4A	up in GC Tfh
722	VIM	down in GC Tfh
723	HACD1	up in GC Tfh
724	STAM	up in GC Tfh
725	MRC1	up in GC Tfh
726	NEBL	up in GC Tfh
727	PIP4K2A	down in GC Tfh
728	LRRC37A6P	down in GC Tfh
729	SVIL	down in GC Tfh
730	MAP3K8	up in GC Tfh
731	NRP1	up in GC Tfh
732	PARD3	up in GC Tfh
733	ZNF33B	down in GC Tfh
734	ALOX5	down in GC Tfh
735	ERCC6	up in GC Tfh
736	ANK3	down in GC Tfh
737	RTKN2	down in GC Tfh
738	HKDC1	down in GC Tfh
739	TSPAN15	down in GC Tfh
740	VCL	down in GC Tfh
741	KAT6B	up in GC Tfh
742	ZMIZ1	up in GC Tfh
743	STAMBPL1	up in GC Tfh
744	ACTA2	up in GC Tfh
745	CEP55	up in GC Tfh
746	PLCE1	down in GC Tfh
747	HELLS	up in GC Tfh
748	PDLIM1	up in GC Tfh
749	FRAT2	up in GC Tfh
750	GOLGA7B	down in GC Tfh
751	DNMBP	down in GC Tfh
752	ERLIN1	up in GC Tfh
753	RP11-317F20.3	down in GC Tfh
754	ABLIM1	down in GC Tfh
755	RP11-539I5.1	up in GC Tfh
756	INPP5F	up in GC Tfh
757	WDR11	up in GC Tfh
758	PLEKHA1	down in GC Tfh
759	HTRA1	up in GC Tfh
760	DPYSL4	down in GC Tfh
761	PWWP2B	down in GC Tfh
762	ADAM8	down in GC Tfh
763	CALY	down in GC Tfh
764	NINJ2	up in GC Tfh
765	RP11-664D1.1	down in GC Tfh
766	CCND2	down in GC Tfh
767	CD9	down in GC Tfh
768	CD27	up in GC Tfh
769	LINC00937	up in GC Tfh
770	RP11-113C12.4	up in GC Tfh
771	A2M	down in GC Tfh
772	KLRB1	down in GC Tfh
773	CLEC7A	up in GC Tfh
774	EMP1	down in GC Tfh
775	PTPRO	down in GC Tfh
776	ST8SIA1	up in GC Tfh
777	RP11-73M14.1	up in GC Tfh
778	BCAT1	up in GC Tfh
779	LRMP	up in GC Tfh
780	RP11-713N11.6	up in GC Tfh
781	PTHLH	up in GC Tfh
782	ETFBKMT	down in GC Tfh
783	CPNE8	up in GC Tfh
784	MUC19	down in GC Tfh
785	NELL2	down in GC Tfh
786	RP11-96H19.1	down in GC Tfh
787	PCED1B	up in GC Tfh
788	SLC48A1	down in GC Tfh
789	CCDC184	down in GC Tfh
790	CACNB3	down in GC Tfh
791	CCDC65	down in GC Tfh
792	FKBP11	down in GC Tfh
793	WNT10B	down in GC Tfh
794	FAIM2	up in GC Tfh
795	LIMA1	up in GC Tfh
796	SLC11A2	up in GC Tfh
797	CELA1	down in GC Tfh
798	GALNT6	down in GC Tfh
799	GRASP	down in GC Tfh
800	KRT86	up in GC Tfh
801	SOAT2	down in GC Tfh
802	ZNF385A	down in GC Tfh
803	ITGA5	down in GC Tfh
804	MYL6B	up in GC Tfh
805	IL23A	down in GC Tfh
806	MARCH9	down in GC Tfh
807	CYP27B1	down in GC Tfh
808	FAM19A2	down in GC Tfh
809	PABPC1P4	down in GC Tfh
810	TBK1	up in GC Tfh
811	RASSF3	down in GC Tfh
812	HELB	down in GC Tfh
813	GRIP1	down in GC Tfh
814	CPM	up in GC Tfh
815	GLIPR1	down in GC Tfh
816	E2F7	up in GC Tfh
817	DUSP6	up in GC Tfh
818	LINC01619	up in GC Tfh
819	SOCS2	down in GC Tfh
820	USP44	down in GC Tfh
821	ELK3	down in GC Tfh
822	ANKS1B	up in GC Tfh
823	PARPBP	up in GC Tfh
824	NT5DC3	down in GC Tfh
825	SLC41A2	up in GC Tfh
826	SELPLG	down in GC Tfh
827	CORO1C	up in GC Tfh
828	PTPN11	up in GC Tfh
829	SLC8B1	down in GC Tfh
830	KSR2	up in GC Tfh
831	RFC5	up in GC Tfh
832	WSB2	up in GC Tfh
833	VSIG10	up in GC Tfh
834	PXN	down in GC Tfh
835	VPS37B	down in GC Tfh
836	RP11-463O12.5	down in GC Tfh
837	FZD10-AS1	down in GC Tfh
838	LINC00539	up in GC Tfh
839	FGF9	down in GC Tfh
840	USP12	up in GC Tfh
841	SLC46A3	up in GC Tfh
842	N4BP2L1	up in GC Tfh
843	SPG20	down in GC Tfh
844	LHFP	up in GC Tfh
845	RP11-413N19.2	up in GC Tfh
846	EPSTI1	up in GC Tfh
847	SERP2	up in GC Tfh
848	TSC22D1	up in GC Tfh
849	TPT1	down in GC Tfh
850	SLC25A30	down in GC Tfh
851	CAB39L	up in GC Tfh
852	DLEU2	up in GC Tfh
853	RPL18P10	up in GC Tfh
854	WDFY2	down in GC Tfh
855	RP11-327P2.5	down in GC Tfh
856	FABP5P2	up in GC Tfh
857	NEK3	up in GC Tfh
858	DIAPH3	up in GC Tfh
859	FABP5P1	up in GC Tfh
860	TBC1D4	up in GC Tfh
861	LMO7	up in GC Tfh
862	NDFIP2	up in GC Tfh
863	GPR183	down in GC Tfh
864	TNFSF13B	down in GC Tfh
865	MYO16	down in GC Tfh
866	IRS2	down in GC Tfh
867	LINC00565	down in GC Tfh
868	RASA3	down in GC Tfh
869	RNASE6	down in GC Tfh
870	NDRG2	down in GC Tfh
871	TRAV13-2	down in GC Tfh
872	REC8	up in GC Tfh
873	ARHGAP5	down in GC Tfh
874	EGLN3	down in GC Tfh
875	MIS18BP1	up in GC Tfh
876	NIN	up in GC Tfh
877	PTGER2	down in GC Tfh
878	CDKN3	up in GC Tfh
879	CNIH1	up in GC Tfh
880	DLGAP5	up in GC Tfh
881	TMEM30B	down in GC Tfh
882	HSPA2	down in GC Tfh
883	PLEKHG3	down in GC Tfh
884	RP11-862P13.1	down in GC Tfh
885	CTD-2325P2.4	up in GC Tfh
886	CTD-2325P2.3	up in GC Tfh
887	ADAM20	down in GC Tfh
888	PCNX1	down in GC Tfh
889	FOS	down in GC Tfh
890	BATF	up in GC Tfh
891	CEP128	up in GC Tfh
892	GPR65	down in GC Tfh
893	EML5	down in GC Tfh
894	LGMN	up in GC Tfh
895	ASB2	up in GC Tfh
896	IFI27	down in GC Tfh
897	SERPINA1	up in GC Tfh
898	SYNE3	down in GC Tfh
899	C14orf132	down in GC Tfh
900	CDC42BPB	down in GC Tfh
901	GPR132	down in GC Tfh
902	CRIP2	down in GC Tfh
903	IGHV4-34	down in GC Tfh
904	IGHV1-45	down in GC Tfh
905	HERC2P3	up in GC Tfh
906	RP11-361C13.1	up in GC Tfh
907	RP11-603B24.1	up in GC Tfh
908	APBA2	down in GC Tfh
909	SCG5	up in GC Tfh
910	FMN1	down in GC Tfh
911	RASGRP1	down in GC Tfh
912	BMF	up in GC Tfh
913	NUSAP1	up in GC Tfh
914	TYRO3	down in GC Tfh
915	STRC	down in GC Tfh
916	SORD2P	up in GC Tfh
917	TMOD2	down in GC Tfh
918	MAPK6	up in GC Tfh
919	MYO5A	up in GC Tfh
920	RAB27A	up in GC Tfh
921	RP11-139H15.5	up in GC Tfh
922	RP11-178D12.2	up in GC Tfh
923	LIPC	up in GC Tfh
924	MYO1E	up in GC Tfh
925	ANXA2	down in GC Tfh
926	RORA	down in GC Tfh
927	CTD-2501E16.2	down in GC Tfh
928	AC007950.2	down in GC Tfh
929	PCAT29	up in GC Tfh
930	RP11-1006G14.1	up in GC Tfh
931	ADPGK-AS1	down in GC Tfh
932	ARID3B	down in GC Tfh
933	C15orf39	down in GC Tfh
934	PEAK1	up in GC Tfh
935	CTSH	down in GC Tfh
936	RP11-382A20.3	down in GC Tfh
937	UBE2Q2P1	down in GC Tfh
938	NMB	up in GC Tfh
939	RP11-815J21.4	up in GC Tfh
940	NTRK3	up in GC Tfh
941	BLM	up in GC Tfh
942	SLCO3A1	down in GC Tfh
943	MCTP2	down in GC Tfh
944	SYNM	down in GC Tfh
945	RP11-526I2.5	down in GC Tfh
946	DECR2	down in GC Tfh
947	RP11-161M6.2	up in GC Tfh
948	SOX8	down in GC Tfh
949	RP11-161M6.3	up in GC Tfh
950	ECI1	up in GC Tfh
951	AC141586.5	up in GC Tfh
952	ZG16B	up in GC Tfh
953	TNFRSF12A	down in GC Tfh
954	TFAP4	down in GC Tfh
955	CORO7	down in GC Tfh
956	VASN	down in GC Tfh
957	CARHSP1	up in GC Tfh
958	RMI2	up in GC Tfh
959	CTD-3088G3.8	down in GC Tfh
960	LITAF	down in GC Tfh
961	ABCC6	down in GC Tfh
962	DNAH3	down in GC Tfh
963	SMG1P4	up in GC Tfh
964	SDR42E2	down in GC Tfh
965	IL4R	down in GC Tfh
966	SBK1	down in GC Tfh
967	APOBR	down in GC Tfh
968	SGF29	down in GC Tfh
969	RP11-455F5.5	up in GC Tfh
970	ITGAL	up in GC Tfh
971	CLUHP3	down in GC Tfh
972	C16orf87	up in GC Tfh
973	NKD1	down in GC Tfh
974	RP11-401P9.7	down in GC Tfh
975	RP11-401P9.6	down in GC Tfh
976	PLLP	down in GC Tfh
977	TEPP	down in GC Tfh
978	TRADD	down in GC Tfh
979	HSF4	down in GC Tfh
980	PLEKHG4	down in GC Tfh
981	FAM65A	down in GC Tfh
982	SMPD3	up in GC Tfh
983	HYDIN	down in GC Tfh
984	ZNRF1	up in GC Tfh
985	MAF	up in GC Tfh
986	RP11-70D24.2	up in GC Tfh
987	CDYL2	up in GC Tfh
988	COTL1	up in GC Tfh
989	SNAI3	down in GC Tfh
990	CTU2	down in GC Tfh
991	VPS9D1	down in GC Tfh
992	ZNF276	down in GC Tfh
993	FAM101B	down in GC Tfh
994	MYO1C	down in GC Tfh
995	RAP1GAP2	down in GC Tfh
996	P2RX5	up in GC Tfh
997	ARRB2	down in GC Tfh
998	CXCL16	down in GC Tfh
999	NLGN2	down in GC Tfh
1000	AURKB	up in GC Tfh
1001	PIK3R5	down in GC Tfh
1002	TMEM220	down in GC Tfh
1003	CENPV	down in GC Tfh
1004	RASD1	down in GC Tfh
1005	LGALS9C	up in GC Tfh
1006	SPECC1	up in GC Tfh
1007	LGALS9B	up in GC Tfh
1008	RAB34	down in GC Tfh
1009	CTC-304I17.6	down in GC Tfh
1010	RP11-799D4.4	down in GC Tfh
1011	SLFN5	down in GC Tfh
1012	RP11-47L3.1	down in GC Tfh
1013	SLFN11	down in GC Tfh
1014	IKZF3	up in GC Tfh
1015	RARA	down in GC Tfh
1016	TOP2A	up in GC Tfh
1017	IGFBP4	up in GC Tfh
1018	RP5-1028K7.2	up in GC Tfh
1019	CCR7	down in GC Tfh
1020	RP11-242D8.1	up in GC Tfh
1021	HEXIM1	down in GC Tfh
1022	NSFP1	up in GC Tfh
1023	NSF	up in GC Tfh
1024	EFCAB13	down in GC Tfh
1025	ZNF652	down in GC Tfh
1026	NOG	down in GC Tfh
1027	RP11-159D12.8	up in GC Tfh
1028	MSX2P1	down in GC Tfh
1029	YPEL2	up in GC Tfh
1030	BCAS3	up in GC Tfh
1031	TANC2	down in GC Tfh
1032	RP11-556O9.2	down in GC Tfh
1033	CYB561	down in GC Tfh
1034	ACE	down in GC Tfh
1035	ERN1	down in GC Tfh
1036	AXIN2	down in GC Tfh
1037	PRKCA	down in GC Tfh
1038	KPNA2	up in GC Tfh
1039	RP11-147L13.14	up in GC Tfh
1040	CD300A	down in GC Tfh
1041	RAB37	up in GC Tfh
1042	RNF157	down in GC Tfh
1043	ST6GALNAC1	down in GC Tfh
1044	TBC1D16	down in GC Tfh
1045	SLC26A11	down in GC Tfh
1046	RPL12P37	down in GC Tfh
1047	SECTM1	up in GC Tfh
1048	TBCD	down in GC Tfh
1049	YES1	down in GC Tfh
1050	EMILIN2	down in GC Tfh
1051	LAMA3	down in GC Tfh
1052	TTC39C	down in GC Tfh
1053	TTC39C-AS1	down in GC Tfh
1054	RP11-799B12.1	down in GC Tfh
1055	TAF4B	down in GC Tfh
1056	RNF125	down in GC Tfh
1057	GALNT1	up in GC Tfh
1058	PSTPIP2	down in GC Tfh
1059	RP11-426J5.3	down in GC Tfh
1060	SMAD7	down in GC Tfh
1061	SNHG22	down in GC Tfh
1062	MEX3C	up in GC Tfh
1063	TCF4	up in GC Tfh
1064	ZNF532	down in GC Tfh
1065	ZNF516	down in GC Tfh
1066	RP11-4B16.4	down in GC Tfh
1067	RP11-567M16.6	down in GC Tfh
1068	ADNP2	down in GC Tfh
1069	LZTS3	down in GC Tfh
1070	CHGB	up in GC Tfh
1071	PLCB1	down in GC Tfh
1072	ANKEF1	down in GC Tfh
1073	ISM1	down in GC Tfh
1074	RP5-1077I2.3	up in GC Tfh
1075	RP1-167O22.1	up in GC Tfh
1076	MIR663AHG	down in GC Tfh
1077	RP5-1085F17.3	up in GC Tfh
1078	ACSS2	down in GC Tfh
1079	RNU4-40P	down in GC Tfh
1080	SAMHD1	down in GC Tfh
1081	PLCG1-AS1	down in GC Tfh
1082	TOX2	up in GC Tfh
1083	KCNK15	up in GC Tfh
1084	SNAI1	down in GC Tfh
1085	ATP9A	up in GC Tfh
1086	DOK5	up in GC Tfh
1087	ZBP1	down in GC Tfh
1088	PMEPA1	down in GC Tfh
1089	NKILA	down in GC Tfh
1090	PPP4R1L	down in GC Tfh
1091	STMN3	down in GC Tfh
1092	CFD	down in GC Tfh
1093	ADAMTSL5	down in GC Tfh
1094	GADD45B	down in GC Tfh
1095	TLE2	down in GC Tfh
1096	GNA15	down in GC Tfh
1097	S1PR4	down in GC Tfh
1098	MATK	down in GC Tfh
1099	EBI3	up in GC Tfh
1100	SH2D3A	down in GC Tfh
1101	ADGRE1	down in GC Tfh
1102	INSR	down in GC Tfh
1103	CTB-133G6.1	up in GC Tfh
1104	CDKN2D	down in GC Tfh
1105	LDLR	down in GC Tfh
1106	CCDC159	up in GC Tfh
1107	IER2	down in GC Tfh
1108	ADGRL1	down in GC Tfh
1109	ADGRE5	down in GC Tfh
1110	PGLYRP2	down in GC Tfh
1111	KLF2	down in GC Tfh
1112	SLC5A5	down in GC Tfh
1113	ARRDC2	down in GC Tfh
1114	AC003973.3	down in GC Tfh
1115	DPY19L3	up in GC Tfh
1116	SLC7A10	up in GC Tfh
1117	FXYD7	down in GC Tfh
1118	FBXO27	up in GC Tfh
1119	TGFB1	down in GC Tfh
1120	LINC01480	up in GC Tfh
1121	CD79A	up in GC Tfh
1122	CEACAM1	down in GC Tfh
1123	PLAUR	down in GC Tfh
1124	PPM1N	down in GC Tfh
1125	IGFL2	up in GC Tfh
1126	CALM3	up in GC Tfh
1127	EMP3	down in GC Tfh
1128	HSD17B14	down in GC Tfh
1129	ALDH16A1	down in GC Tfh
1130	FLT3LG	down in GC Tfh
1131	MIR150	down in GC Tfh
1132	FCGRT	down in GC Tfh
1133	RCN3	down in GC Tfh
1134	NOSIP	down in GC Tfh
1135	IL4I1	down in GC Tfh
1136	ATF5	down in GC Tfh
1137	SIGLEC10	up in GC Tfh
1138	ZNF578	down in GC Tfh
1139	MYADM	down in GC Tfh
1140	LAIR2	up in GC Tfh
1141	ZNF580	up in GC Tfh
1142	AC006548.28	down in GC Tfh
1143	ZNF280B	down in GC Tfh
1144	KIAA1671	up in GC Tfh
1145	OSM	down in GC Tfh
1146	MTFP1	down in GC Tfh
1147	RP4-539M6.22	down in GC Tfh
1148	YWHAH	up in GC Tfh
1149	RFPL2	down in GC Tfh
1150	LARGE1	down in GC Tfh
1151	RBFOX2	down in GC Tfh
1152	APOL3	down in GC Tfh
1153	PVALB	up in GC Tfh
1154	RN7SKP214	up in GC Tfh
1155	LGALS1	down in GC Tfh
1156	MAFF	down in GC Tfh
1157	APOBEC3B	up in GC Tfh
1158	SYNGR1	down in GC Tfh
1159	CACNA1I	down in GC Tfh
1160	TNFRSF13C	down in GC Tfh
1161	PRR34-AS1	up in GC Tfh
1162	GRAMD4	up in GC Tfh
1163	CERK	down in GC Tfh
1164	CH507-24F1.1	up in GC Tfh
1165	RP11-717F1.2	up in GC Tfh
1166	CH507-254M2.1	up in GC Tfh
1167	CH507-254M2.2	up in GC Tfh
1168	CYP4F29P	up in GC Tfh
1169	ANKRD20A11P	up in GC Tfh
1170	LINC00158	up in GC Tfh
1171	AP000253.1	down in GC Tfh
1172	EVA1C	down in GC Tfh
1173	IFNAR2	up in GC Tfh
1174	IFNGR2	down in GC Tfh
1175	RCAN1	up in GC Tfh
1176	ZNF295-AS1	up in GC Tfh
1177	TRPM2	down in GC Tfh
1178	ITGB2-AS1	up in GC Tfh
1179	COL6A1	down in GC Tfh
