# Supplementary material for: Impaired HA-specific T follicular helper cell and antibody responses to influenza vaccination are linked to inflammation in humans
Source: eLife. 2021 Nov 2;10:e70554. doi: 10.7554/eLife.70554 (PMC8562996; doi:10.7554/eLife.70554)
Supplement: Source data 3. [file elife-70554-supp7.csv]

	gene	log2FoldChange	padj	gene.sign
ENSG00000162496	DHRS3	1.84595785526444	0.000217025652361547	down in d0 cTfh
ENSG00000116983	HPCAL4	1.08891466250124	0.0659474652044262	down in d0 cTfh
ENSG00000132849	PATJ	1.37020269364235	0.000505473843572478	down in d0 cTfh
ENSG00000184588	PDE4B	0.500051391775062	0.00878326559307248	down in d0 cTfh
ENSG00000116337	AMPD2	1.75667603469654	4.74632501242715e-09	down in d0 cTfh
ENSG00000265972	TXNIP	1.31815934171099	0.000346286647975371	down in d0 cTfh
ENSG00000264343	NOTCH2NL	0.620582807441211	0.0857115215674598	down in d0 cTfh
ENSG00000196189	SEMA4A	2.43049191776253	1.21635324139335e-07	down in d0 cTfh
ENSG00000163564	PYHIN1	-0.834168707903235	0.0457895298741001	up in d7 cTfh
ENSG00000135821	GLUL	1.17148562632406	0.00115787084304868	down in d0 cTfh
ENSG00000143333	RGS16	1.17588526535056	0.00487887116793252	down in d0 cTfh
ENSG00000000971	CFH	0.912089225386907	0.00883754074776169	down in d0 cTfh
ENSG00000162909	CAPN2	0.624579386681279	0.0319364817035794	down in d0 cTfh
ENSG00000115825	PRKD3	1.72195948697541	8.71542208554697e-06	down in d0 cTfh
ENSG00000163171	CDC42EP3	1.11634048756625	1.28440548841364e-05	down in d0 cTfh
ENSG00000186854	TRABD2A	1.18454605772944	0.0138415204748973	down in d0 cTfh
ENSG00000172005	MAL	1.33271672722435	0.000996461021138611	down in d0 cTfh
ENSG00000168758	SEMA4C	1.20574000931013	0.020373870621352	down in d0 cTfh
ENSG00000071073	MGAT4A	0.609310794220872	0.0033443274700341	down in d0 cTfh
ENSG00000169756	LIMS1	-0.953411053645417	0.000974038049894283	up in d7 cTfh
ENSG00000256977	LIMS3	-1.37543324367092	0.000258621994090764	up in d7 cTfh
ENSG00000172965	MIR4435-2HG	-2.37967187160662	2.17185347482765e-14	up in d7 cTfh
ENSG00000240350	AC017002.1	-1.4734354162111	0.00566394331449887	up in d7 cTfh
ENSG00000168280	KIF5C	1.36179833447307	0.0467780647202009	down in d0 cTfh
ENSG00000153250	RBMS1	0.745323357981444	0.00115567447789157	down in d0 cTfh
ENSG00000197635	DPP4	1.90580472580646	0.000229846030536411	down in d0 cTfh
ENSG00000138386	NAB1	-1.80019214539253	6.12138322316249e-06	up in d7 cTfh
ENSG00000163599	CTLA4	-2.19741497423793	2.60078119495388e-09	up in d7 cTfh
ENSG00000188389	PDCD1	-2.74057801024145	3.31875858491786e-11	up in d7 cTfh
ENSG00000091181	IL5RA	1.14996534286741	0.00921998180082908	down in d0 cTfh
ENSG00000134107	BHLHE40	1.86462910362353	2.03276897212487e-09	down in d0 cTfh
ENSG00000154764	WNT7A	2.35871840154949	5.75249936491775e-06	down in d0 cTfh
ENSG00000174738	NR1D2	0.568030715802356	0.0465619467118258	down in d0 cTfh
ENSG00000164088	PPM1M	-0.828206773735999	0.0868141819310226	up in d7 cTfh
ENSG00000183662	FAM19A1	1.16009106280038	0.0445828170925225	down in d0 cTfh
ENSG00000181847	TIGIT	-1.69762766198969	0.00155374965301407	up in d7 cTfh
ENSG00000123933	MXD4	-1.13342372584041	3.64760404833739e-05	up in d7 cTfh
ENSG00000168824	NSG1	2.01865372871833	9.26758240986401e-05	down in d0 cTfh
ENSG00000047365	ARAP2	-1.63764590052817	1.89985773421159e-14	up in d7 cTfh
ENSG00000247193	RP11-431M7.3	-1.79194008690683	0.00820558324057424	up in d7 cTfh
ENSG00000138684	IL21	-0.978716254617412	0.0622463621626164	up in d7 cTfh
ENSG00000170365	SMAD1	-1.01376793408233	0.0448868025921026	up in d7 cTfh
ENSG00000151729	SLC25A4	1.44771035264565	0.00124865588746653	down in d0 cTfh
ENSG00000168685	IL7R	0.795321181231269	0.0010986358383761	down in d0 cTfh
ENSG00000151422	FER	1.73682639385228	0.00041145128771823	down in d0 cTfh
ENSG00000164209	SLC25A46	-1.12489356348023	0.0319375756490788	up in d7 cTfh
ENSG00000164466	SFXN1	-1.03325680021364	6.58013853029753e-08	up in d7 cTfh
ENSG00000182230	FAM153B	1.45741398952982	0.0258602464379874	down in d0 cTfh
ENSG00000137267	TUBB2A	1.08650078095066	0.000308119287945657	down in d0 cTfh
ENSG00000112149	CD83	1.89260105374013	1.03956420993205e-10	down in d0 cTfh
ENSG00000229646	RP11-330A16.1	-2.72960863462075	6.52322000735064e-06	up in d7 cTfh
ENSG00000272009	RP1-313I6.12	1.47913872969364	4.81614845193976e-05	down in d0 cTfh
ENSG00000197279	ZNF165	2.00532180261443	6.23404046343182e-07	down in d0 cTfh
ENSG00000237499	RP11-356I2.4	1.11485242080988	0.00318031563934653	down in d0 cTfh
ENSG00000118503	TNFAIP3	1.7580549209015	7.07434877468775e-18	down in d0 cTfh
ENSG00000024862	CCDC28A	-0.791356749436217	0.00176958306327124	up in d7 cTfh
ENSG00000164674	SYTL3	0.586938115704761	0.0969504613109937	down in d0 cTfh
ENSG00000112486	CCR6	1.46563279912992	0.0106600678950097	down in d0 cTfh
ENSG00000183696	UPP1	0.951080011670239	4.00132560541296e-05	down in d0 cTfh
ENSG00000047634	SCML1	1.44691115440443	0.00106389808002451	down in d0 cTfh
ENSG00000198814	GK	-1.14940769791843	0.0171720784064203	up in d7 cTfh
ENSG00000102007	PLP2	0.785560145823945	1.25869620735238e-05	down in d0 cTfh
ENSG00000204131	NHSL2	2.19010019648379	1.59295621106793e-06	down in d0 cTfh
ENSG00000078596	ITM2A	-1.06292969857151	1.59674333013581e-06	up in d7 cTfh
ENSG00000198932	GPRASP1	1.69532828793831	0.000634187173162955	down in d0 cTfh
ENSG00000183918	SH2D1A	-1.05199084486918	1.23735981774758e-05	up in d7 cTfh
ENSG00000155966	AFF2	-1.27659518472419	0.0119877063766443	up in d7 cTfh
ENSG00000029993	HMGB3	-1.10393304271008	0.0993772227586886	up in d7 cTfh
ENSG00000067840	PDZD4	1.12355401268242	0.00473136036088876	down in d0 cTfh
ENSG00000147408	CSGALNACT1	1.79013172818924	7.21677197173381e-05	down in d0 cTfh
ENSG00000120875	DUSP4	-0.786322147384671	0.0849437979639403	up in d7 cTfh
ENSG00000076641	PAG1	0.591352235233354	0.0197705849650868	down in d0 cTfh
ENSG00000164687	FABP5	-1.32191641356445	2.12306969092072e-05	up in d7 cTfh
ENSG00000034677	RNF19A	-1.38961822270937	2.11956980708158e-09	up in d7 cTfh
ENSG00000253824	KB-173C10.2	-0.791532780278496	0.0043720689068348	up in d7 cTfh
ENSG00000254364	KB-1615E4.3	-1.13620831084466	0.0681165612550598	up in d7 cTfh
ENSG00000104447	TRPS1	-1.07667202131912	0.00246206822132193	up in d7 cTfh
ENSG00000147889	CDKN2A	-1.59513478459129	0.0146822954972117	up in d7 cTfh
ENSG00000135046	ANXA1	0.887780269174486	1.42712682468455e-06	down in d0 cTfh
ENSG00000171159	C9orf16	-0.865811149989259	6.60632157073293e-05	up in d7 cTfh
ENSG00000133812	SBF2	1.22799658392281	0.0160509509567888	down in d0 cTfh
ENSG00000149177	PTPRJ	-0.981895248536584	0.00570273433965981	up in d7 cTfh
ENSG00000234964	FABP5P7	-1.30540757300278	8.03128354571334e-06	up in d7 cTfh
ENSG00000124942	AHNAK	0.776782813113709	9.84146218995002e-06	down in d0 cTfh
ENSG00000172725	CORO1B	-0.713152948596965	0.047568468192245	up in d7 cTfh
ENSG00000235505	RP11-693N9.2	-0.816425978114974	0.090383898970981	up in d7 cTfh
ENSG00000160593	JAML	0.967816646108245	0.00656725746026415	down in d0 cTfh
ENSG00000134460	IL2RA	1.72872759522051	0.00192135645833501	down in d0 cTfh
ENSG00000026025	VIM	0.997881609853179	4.74632501242715e-09	down in d0 cTfh
ENSG00000197321	SVIL	1.53678150274438	1.14107325563595e-06	down in d0 cTfh
ENSG00000107679	PLEKHA1	1.17232424866837	0.000240075561807342	down in d0 cTfh
ENSG00000171813	PWWP2B	1.29645740103854	0.0106450087192622	down in d0 cTfh
ENSG00000151651	ADAM8	1.61765634171889	1.27758159568645e-05	down in d0 cTfh
ENSG00000139193	CD27	-1.48098489695551	7.29567282916698e-09	up in d7 cTfh
ENSG00000134531	EMP1	2.73561910882513	1.14159422045282e-08	down in d0 cTfh
ENSG00000118308	LRMP	-1.75565770863905	3.66500890194033e-10	up in d7 cTfh
ENSG00000184613	NELL2	1.4878409931556	0.00183003274325267	down in d0 cTfh
ENSG00000134285	FKBP11	1.04323059061306	0.00466106965178086	down in d0 cTfh
ENSG00000161835	GRASP	1.27016137994522	1.67155949841203e-07	down in d0 cTfh
ENSG00000161638	ITGA5	1.37575054644847	1.74489658608633e-05	down in d0 cTfh
ENSG00000196465	MYL6B	-1.87870592177291	0.000151204348360706	up in d7 cTfh
ENSG00000110944	IL23A	1.18287753246396	0.0184363246988403	down in d0 cTfh
ENSG00000139266	MARCH9	1.45563747959884	0.0196558771802092	down in d0 cTfh
ENSG00000120833	SOCS2	1.38016220190918	0.0237743134128467	down in d0 cTfh
ENSG00000176871	WSB2	-0.861807326178737	0.0640796180989342	up in d7 cTfh
ENSG00000133104	SPG20	1.62821954392021	0.000214515625343028	down in d0 cTfh
ENSG00000133106	EPSTI1	-1.4673934813456	0.000439568571755588	up in d7 cTfh
ENSG00000139668	WDFY2	0.82881809362339	0.0117760383355008	down in d0 cTfh
ENSG00000236044	FABP5P2	-1.1868136931612	0.000260980825286766	up in d7 cTfh
ENSG00000236972	FABP5P1	-1.10521504232727	0.00617172427900174	up in d7 cTfh
ENSG00000136111	TBC1D4	-1.63374063262709	3.04284191294334e-07	up in d7 cTfh
ENSG00000185950	IRS2	1.96840622504474	3.36781551524336e-14	down in d0 cTfh
ENSG00000182107	TMEM30B	1.01638678590558	0.010667395900714	down in d0 cTfh
ENSG00000170345	FOS	1.86489898473466	2.56286021892095e-10	down in d0 cTfh
ENSG00000100628	ASB2	-1.62732436179474	0.00712259865392086	up in d7 cTfh
ENSG00000182809	CRIP2	1.07801751027916	0.0171538274267798	down in d0 cTfh
ENSG00000137804	NUSAP1	-1.80906158229545	7.4245689763696e-05	up in d7 cTfh
ENSG00000069974	RAB27A	-1.11607341125282	3.67053507329863e-06	up in d7 cTfh
ENSG00000182718	ANXA2	0.579368272806698	0.0493287827984442	down in d0 cTfh
ENSG00000259641	PCAT29	-1.29242997475768	0.0174760899040672	up in d7 cTfh
ENSG00000103811	CTSH	2.55131092000144	5.42025617324134e-11	down in d0 cTfh
ENSG00000197696	NMB	-1.53425124017962	0.00198861866291158	up in d7 cTfh
ENSG00000260807	RP11-161M6.2	1.27722792830348	0.0601719010721844	up in d7 cTfh
ENSG00000153048	CARHSP1	-0.812968063320444	0.0855039280627705	up in d7 cTfh
ENSG00000155330	C16orf87	-1.25358669521189	0.0002409104752368	up in d7 cTfh
ENSG00000178573	MAF	-2.0916242488973	1.86847774047404e-14	up in d7 cTfh
ENSG00000103187	COTL1	-0.786108669959355	0.000300808784246711	up in d7 cTfh
ENSG00000131759	RARA	0.667881910065175	0.0191309677376653	down in d0 cTfh
ENSG00000131747	TOP2A	-1.33706054064027	0.0353415573927088	up in d7 cTfh
ENSG00000266088	RP5-1028K7.2	-2.78660405280644	1.16686096405967e-06	up in d7 cTfh
ENSG00000198740	ZNF652	1.37602481509203	0.000873715583028868	down in d0 cTfh
ENSG00000229590	MSX2P1	0.916522366603588	0.0732414680747148	down in d0 cTfh
ENSG00000178607	ERN1	1.5040362739524	1.913593309903e-06	down in d0 cTfh
ENSG00000168646	AXIN2	1.36425822766124	0.0401972360737552	down in d0 cTfh
ENSG00000141576	RNF157	1.82448875521951	0.00145454764518307	down in d0 cTfh
ENSG00000264745	TTC39C-AS1	1.08093047333253	0.0548439684733102	down in d0 cTfh
ENSG00000101665	SMAD7	1.05833302935991	0.000728826175539237	down in d0 cTfh
ENSG00000267322	SNHG22	2.63087951961011	4.09703103945998e-12	down in d0 cTfh
ENSG00000182621	PLCB1	1.27965139971502	0.0252129569519901	down in d0 cTfh
ENSG00000101230	ISM1	1.12830009160521	4.36606172749725e-05	down in d0 cTfh
ENSG00000124191	TOX2	-2.34957325441366	6.33738261270167e-05	up in d7 cTfh
ENSG00000099860	GADD45B	0.557267203912576	0.0298958564626892	down in d0 cTfh
ENSG00000221946	FXYD7	0.936682684370047	0.0988807291658785	down in d0 cTfh
ENSG00000160014	CALM3	-0.87428094295444	0.000184602749046398	up in d7 cTfh
ENSG00000104951	IL4I1	2.34090999953953	6.41897151366651e-06	down in d0 cTfh
ENSG00000179820	MYADM	1.50152263861794	1.86453999116072e-15	down in d0 cTfh
ENSG00000159128	IFNGR2	2.2323114243046	1.7149244555919e-08	down in d0 cTfh
