# Supplementary material for: Impaired HA-specific T follicular helper cell and antibody responses to influenza vaccination are linked to inflammation in humans
Source: eLife. 2021 Nov 2;10:e70554. doi: 10.7554/eLife.70554 (PMC8562996; doi:10.7554/eLife.70554)
Supplement: Source data 4. [file elife-70554-supp8.csv]

	gene	log2FoldChange	padj	gene.sign
ENSG00000225630	MTND2P28	1.36445579373054	8.53564371117472e-08	down in d0 cTfh
ENSG00000187608	ISG15	-1.28793744030051	1.42712682468455e-06	up in d7 cTfh
ENSG00000162585	FAAP20	-0.569967502477857	0.0341285829083096	up in d7 cTfh
ENSG00000116771	AGMAT	-1.65825174609561	0.00395667572071393	up in d7 cTfh
ENSG00000233954	UQCRHL	-0.666542078406715	0.00175626876866823	up in d7 cTfh
ENSG00000206652	RNU1-1	1.23771724141204	0.00163552929104075	up in d7 cTfh
ENSG00000238142	RP11-108M9.4	1.62284116238314	0.00506478466219313	up in d7 cTfh
ENSG00000077549	CAPZB	-0.958872493095745	3.31272564656351e-09	up in d7 cTfh
ENSG00000169442	CD52	-1.39630654159455	2.74903614947647e-19	up in d7 cTfh
ENSG00000142733	MAP3K6	0.828965124420664	0.0961162425193407	down in d0 cTfh
ENSG00000235912	RP1-159A19.3	-0.611631223484749	0.00077916412299951	up in d7 cTfh
ENSG00000162511	LAPTM5	-0.872400674184115	1.33989928941692e-05	up in d7 cTfh
ENSG00000175130	MARCKSL1	0.681176813608055	0.0288183357138146	down in d0 cTfh
ENSG00000162521	RBBP4	-0.655427117545975	0.0106949184589639	up in d7 cTfh
ENSG00000134684	YARS	-0.805544125518765	0.0208937142887461	up in d7 cTfh
ENSG00000163874	ZC3H12A	1.42725371788809	1.67155949841203e-07	down in d0 cTfh
ENSG00000197982	C1orf122	-0.948679181960034	0.00680285604387271	up in d7 cTfh
ENSG00000215895	RP11-334L9.1	0.953614673159943	2.93182211854702e-05	down in d0 cTfh
ENSG00000168389	MFSD2A	1.05157522209884	0.090851106779096	down in d0 cTfh
ENSG00000236876	TMSB4XP1	-0.709299827193567	0.000870429770390922	up in d7 cTfh
ENSG00000117394	SLC2A1	0.939928602266704	0.0870799507522652	down in d0 cTfh
ENSG00000173660	UQCRH	-0.711781232772393	0.000307096256301589	up in d7 cTfh
ENSG00000116171	SCP2	-0.642865829348511	0.0267427367862059	up in d7 cTfh
ENSG00000177606	JUN	0.910788324063129	0.00363367905986062	down in d0 cTfh
ENSG00000273338	RP11-386I14.4	1.15111748304696	0.0017690360991269	down in d0 cTfh
ENSG00000162645	GBP2	-1.13350945767086	6.63812483089522e-07	up in d7 cTfh
ENSG00000203914	HSP90B3P	1.37572391974587	1.21635324139335e-07	down in d0 cTfh
ENSG00000122484	RPAP2	-0.787911757186666	0.0214663970260154	up in d7 cTfh
ENSG00000085433	WDR47	0.930691738158057	0.000344763121810328	down in d0 cTfh
ENSG00000162777	DENND2D	-1.17009167877796	0.000603527164436747	up in d7 cTfh
ENSG00000143110	C1orf162	1.14525331417881	2.39003327413755e-05	down in d0 cTfh
ENSG00000116793	PHTF1	-0.807966333018382	0.057443067252571	up in d7 cTfh
ENSG00000081019	RSBN1	0.514318930799415	0.0792414922023073	down in d0 cTfh
ENSG00000134242	PTPN22	-0.608116753924922	0.00760469081678697	up in d7 cTfh
ENSG00000235527	HIPK1-AS1	1.01826882066719	0.0531036452991833	down in d0 cTfh
ENSG00000163349	HIPK1	0.581812593348421	0.0335296752499435	down in d0 cTfh
ENSG00000276216	CH17-373J23.1	1.35571280912501	0.0025718438209943	down in d0 cTfh
ENSG00000271425	NBPF10	0.768035215511885	0.00189405748045725	down in d0 cTfh
ENSG00000271121	NUDT4P2	1.00900514434137	0.0441121545265047	down in d0 cTfh
ENSG00000230832	RP11-325P15.2	0.94179495572893	0.0791913275807779	down in d0 cTfh
ENSG00000270629	NBPF14	0.726068932060167	0.000124612157777895	down in d0 cTfh
ENSG00000177144	NUDT4P1	1.34454714525266	0.00437319094093967	down in d0 cTfh
ENSG00000271383	NBPF19	0.600708577260285	0.00823025372645502	down in d0 cTfh
ENSG00000277452	RN7SL473P	1.28847256374375	0.00669045985249533	down in d0 cTfh
ENSG00000229021	AL591893.1	1.0452578263554	0.086114642332819	down in d0 cTfh
ENSG00000116586	LAMTOR2	-1.07367510009671	0.000179977336021828	up in d7 cTfh
ENSG00000160789	LMNA	1.91679573696215	9.02147371319389e-10	down in d0 cTfh
ENSG00000163565	IFI16	-0.865370316348548	6.40326531314772e-06	up in d7 cTfh
ENSG00000163568	AIM2	-1.60920291076014	0.0188852260493151	up in d7 cTfh
ENSG00000143198	MGST3	0.999521935078258	4.76797525630851e-05	down in d0 cTfh
ENSG00000188404	SELL	-0.623922362375877	0.0370103775438073	up in d7 cTfh
ENSG00000233328	PFN1P1	-0.942490741871078	8.42100905621162e-05	up in d7 cTfh
ENSG00000116161	CACYBP	-0.971274813059622	3.06729230649044e-07	up in d7 cTfh
ENSG00000162783	IER5	1.26469085600606	2.19870905424245e-10	down in d0 cTfh
ENSG00000135842	FAM129A	1.2920645129629	2.08158680199581e-05	down in d0 cTfh
ENSG00000121481	RNF2	1.12927050079207	0.0034702209799993	down in d0 cTfh
ENSG00000116679	IVNS1ABP	0.623675232955097	0.00417842730865999	down in d0 cTfh
ENSG00000090104	RGS1	0.854223821755054	0.00117075150391198	down in d0 cTfh
ENSG00000244414	CFHR1	0.761490155898204	0.00993761824403564	down in d0 cTfh
ENSG00000162894	FCMR	-0.766097235536796	0.00045890296002203	up in d7 cTfh
ENSG00000203709	C1orf132	1.15294614409535	0.075720432207904	down in d0 cTfh
ENSG00000162923	WDR26	-0.581251509733356	0.0180602654560358	up in d7 cTfh
ENSG00000143815	LBR	-0.555958269985382	0.0416731840939237	up in d7 cTfh
ENSG00000143799	PARP1	-1.00550853934996	0.000720471539421818	up in d7 cTfh
ENSG00000231940	RPS7P3	-0.768117670634739	0.0945227108839208	up in d7 cTfh
ENSG00000115738	ID2	1.44221298276968	1.43235200271264e-09	down in d0 cTfh
ENSG00000071575	TRIB2	-1.08916436307326	0.0446348774705228	up in d7 cTfh
ENSG00000251805	SCARNA21	0.665460444099917	0.0940423660419217	down in d0 cTfh
ENSG00000143891	GALM	-1.31472840145062	0.00644458187239676	up in d7 cTfh
ENSG00000115875	SRSF7	0.530485698836205	0.00219789684380819	down in d0 cTfh
ENSG00000152518	ZFP36L2	0.511199866724209	0.0135103999670511	down in d0 cTfh
ENSG00000119729	RHOQ	1.08168526500691	0.0429888360933057	down in d0 cTfh
ENSG00000163219	ARHGAP25	-1.0266446315011	0.00127544205292065	up in d7 cTfh
ENSG00000124357	NAGK	0.656101118426745	0.0182161804685921	down in d0 cTfh
ENSG00000233870	AC007881.4	0.604892553526145	0.0694889816932478	down in d0 cTfh
ENSG00000034510	TMSB10	-0.61345766116072	2.78106784317374e-05	up in d7 cTfh
ENSG00000168899	VAMP5	-1.04907429521128	8.09067272747166e-06	up in d7 cTfh
ENSG00000222041	LINC00152	-1.71797767773975	4.5262960921808e-12	up in d7 cTfh
ENSG00000283196	RP4-614C10.2	-0.714829867116039	0.0439017450426253	up in d7 cTfh
ENSG00000213337	ANKRD39	-0.811537778990779	0.079235985279661	up in d7 cTfh
ENSG00000115539	PDCL3	-1.00513107242762	5.41475428546531e-05	up in d7 cTfh
ENSG00000115604	IL18R1	1.22810610475045	0.0263563544509588	down in d0 cTfh
ENSG00000153094	BCL2L11	-1.17777104359961	0.000597889659395756	up in d7 cTfh
ENSG00000125611	CHCHD5	-0.921269250269414	0.0171538274267798	up in d7 cTfh
ENSG00000155368	DBI	-0.540924541288194	0.00165149114603521	up in d7 cTfh
ENSG00000088179	PTPN4	0.632155509581554	0.0920756287793447	down in d0 cTfh
ENSG00000136732	GYPC	-1.37193669910429	4.17683961958732e-08	up in d7 cTfh
ENSG00000238180	AC017079.4	1.91593876129741	8.0093623909226e-05	down in d0 cTfh
ENSG00000173272	MZT2A	-0.566392214414361	0.0145064266651972	up in d7 cTfh
ENSG00000076003	MCM6	-0.87090110108657	0.00164188809254923	up in d7 cTfh
ENSG00000121966	CXCR4	1.1400861954764	1.24830018601527e-08	down in d0 cTfh
ENSG00000115271	GCA	1.19172265890983	0.010708840754483	down in d0 cTfh
ENSG00000196659	TTC30B	0.892669357386515	0.0115334493819515	down in d0 cTfh
ENSG00000138449	SLC40A1	1.91195902337597	0.00169847539101581	down in d0 cTfh
ENSG00000138378	STAT4	0.646629462675786	0.00524220542410388	down in d0 cTfh
ENSG00000229056	AC020571.3	1.13155698312662	0.0759805022158372	down in d0 cTfh
ENSG00000213104	NPM1P46	1.26363946189965	0.00500978714415192	down in d0 cTfh
ENSG00000119013	NDUFB3	-0.748579742862975	0.0364328992140596	up in d7 cTfh
ENSG00000116030	SUMO1	-0.954230518982317	1.08892185706609e-07	up in d7 cTfh
ENSG00000178562	CD28	-0.755874745631587	0.000944368872256291	up in d7 cTfh
ENSG00000163600	ICOS	-1.2136174279976	1.34081745402661e-05	up in d7 cTfh
ENSG00000118246	FASTKD2	0.629362998677799	0.052629629469238	down in d0 cTfh
ENSG00000163466	ARPC2	-0.946196400786671	3.28178544414065e-12	up in d7 cTfh
ENSG00000079263	SP140	-0.871481333481404	0.00056904960915342	up in d7 cTfh
ENSG00000135930	EIF4E2	-0.7430528766341	0.000127286556245652	up in d7 cTfh
ENSG00000172428	COPS9	-0.6794142474306	1.8251062167387e-05	up in d7 cTfh
ENSG00000122085	MTERF4	-1.04961659743961	0.000286164743432364	up in d7 cTfh
ENSG00000115687	PASK	-1.50711786176373	0.000194778457214533	up in d7 cTfh
ENSG00000115685	PPP1R7	-0.977100164189176	1.25882382182446e-06	up in d7 cTfh
ENSG00000176946	THAP4	-1.052874406855	0.0261088499521238	up in d7 cTfh
ENSG00000241553	ARPC4	-1.13551950445985	0.00105808798664205	up in d7 cTfh
ENSG00000206560	ANKRD28	1.12848014577113	0.0059834128609382	down in d0 cTfh
ENSG00000132967	HMGB1P5	-0.880053799374126	5.09819874532914e-10	up in d7 cTfh
ENSG00000153551	CMTM7	-0.691152160339842	0.00203971284151066	up in d7 cTfh
ENSG00000224094	RPS24P8	-0.505936915455021	0.00287508961182996	up in d7 cTfh
ENSG00000181555	SETD2	-1.32233345292465	4.4999534334387e-09	up in d7 cTfh
ENSG00000145050	MANF	0.698628150441768	0.0452537716827151	down in d0 cTfh
ENSG00000247596	TWF2	-1.00316941294274	0.000830318540421527	up in d7 cTfh
ENSG00000237456	RP11-154D3.1	2.02394475101857	4.78999314972974e-06	up in d7 cTfh
ENSG00000163634	THOC7	-0.601823312098459	0.0318256598261775	up in d7 cTfh
ENSG00000114861	FOXP1	-0.685701998363915	0.000358345131636482	up in d7 cTfh
ENSG00000114573	ATP6V1A	-1.08138452327002	0.00556195492147712	up in d7 cTfh
ENSG00000214301	RP11-91K8.4	-0.918428956074441	0.0371872753075486	up in d7 cTfh
ENSG00000144895	EIF2A	0.625545978236714	0.00311439264035618	down in d0 cTfh
ENSG00000240489	SETP14	-0.792093569247831	0.0283522240489589	up in d7 cTfh
ENSG00000154310	TNIK	-0.890723092012851	0.00183003274325267	up in d7 cTfh
ENSG00000161203	AP2M1	-0.580795864116395	0.0202785388686343	up in d7 cTfh
ENSG00000156976	EIF4A2	0.534047653998334	0.00154789186625803	down in d0 cTfh
ENSG00000180611	MB21D2	1.78990959235349	0.00112843698976763	down in d0 cTfh
ENSG00000213123	TCTEX1D2	-1.09774670297823	0.0537356706844795	up in d7 cTfh
ENSG00000169020	ATP5I	-0.524625727328145	0.00606964567349834	up in d7 cTfh
ENSG00000163950	SLBP	-1.10507453230086	1.80149068343101e-08	up in d7 cTfh
ENSG00000013810	TACC3	-0.755254522378363	0.0362612174960699	up in d7 cTfh
ENSG00000243449	C4orf48	-0.812391687858156	0.00239687010276627	up in d7 cTfh
ENSG00000145220	LYAR	0.988907182416067	0.0281336262908471	down in d0 cTfh
ENSG00000004468	CD38	-1.80039890767567	0.00102962658503646	up in d7 cTfh
ENSG00000002549	LAP3	-1.06479010248097	4.56549935507381e-06	up in d7 cTfh
ENSG00000248780	ARL4AP2	1.28099684883989	1.05557328227513e-08	down in d0 cTfh
ENSG00000145247	OCIAD2	-1.09368738012438	9.1575989056365e-08	up in d7 cTfh
ENSG00000138670	RASGEF1B	1.30382584885979	8.66931219123686e-05	down in d0 cTfh
ENSG00000145287	PLAC8	-0.891515767013833	0.000687669558738285	up in d7 cTfh
ENSG00000187653	TMSB4XP8	-0.647467038613111	0.00102526460371639	up in d7 cTfh
ENSG00000197894	ADH5	-0.573449566193129	0.0450731358849807	up in d7 cTfh
ENSG00000005059	MCUB	-0.606524542830104	7.77883861488536e-05	up in d7 cTfh
ENSG00000250215	CIR1P2	-0.623453888888269	0.074615914704125	up in d7 cTfh
ENSG00000077684	JADE1	0.782917898352155	0.0247958678685435	down in d0 cTfh
ENSG00000164163	ABCE1	0.546430876105202	0.0869456206267371	down in d0 cTfh
ENSG00000121207	LRAT	-1.62371990047479	0.0135103999670511	up in d7 cTfh
ENSG00000250746	RP11-39C10.1	0.515378659973002	0.0510046084425115	down in d0 cTfh
ENSG00000164104	HMGB2	-0.544925856126299	0.00537884059906794	up in d7 cTfh
ENSG00000164120	HPGD	0.853727094413746	0.0110525670383105	down in d0 cTfh
ENSG00000164305	CASP3	-0.698354905619211	0.0273800588994413	up in d7 cTfh
ENSG00000171368	TPPP	1.26824293413788	0.0646448038267666	down in d0 cTfh
ENSG00000206077	ZDHHC11B	1.66855937382091	0.00176931025406847	down in d0 cTfh
ENSG00000188818	ZDHHC11	1.57292376608799	0.0189128170115347	down in d0 cTfh
ENSG00000145494	NDUFS6	-0.730530404876515	0.000265186403755997	up in d7 cTfh
ENSG00000082074	FYB	-0.976138932820129	1.6772762600349e-08	up in d7 cTfh
ENSG00000171522	PTGER4	0.932755350034289	6.87307457921805e-07	down in d0 cTfh
ENSG00000112972	HMGCS1	0.923951340685281	0.0390471838520472	down in d0 cTfh
ENSG00000250461	RP11-631M6.2	0.621708974883772	0.034347517063522	down in d0 cTfh
ENSG00000181104	F2R	-1.19892112587608	0.0757232503041782	up in d7 cTfh
ENSG00000164300	SERINC5	-0.522705162578926	0.0495597404409716	up in d7 cTfh
ENSG00000238000	RP11-274E7.2	-0.560836804621626	0.0525567880067006	up in d7 cTfh
ENSG00000172795	DCP2	-0.924456115461682	0.00010852114652807	up in d7 cTfh
ENSG00000169567	HINT1	-0.54528805629447	0.000232040261663852	up in d7 cTfh
ENSG00000164405	UQCRQ	-0.528672516661469	0.000336545549308637	up in d7 cTfh
ENSG00000081059	TCF7	-0.701220120235437	0.0188030661276908	up in d7 cTfh
ENSG00000249119	MTND6P4	2.08153369682575	2.4485592739654e-10	down in d0 cTfh
ENSG00000247627	MTND4P12	1.1419401381974	0.0110384613087144	down in d0 cTfh
ENSG00000177733	HNRNPA0	0.720675400557	0.0779405453928574	down in d0 cTfh
ENSG00000120727	PAIP2	-0.521556281493846	8.42100905621162e-05	up in d7 cTfh
ENSG00000145819	ARHGAP26	0.9068387135744	0.000763324965493983	down in d0 cTfh
ENSG00000169252	ADRB2	1.70446679294949	6.02787737360305e-05	down in d0 cTfh
ENSG00000164284	GRPEL2	-1.19080261729477	0.0547110806434628	up in d7 cTfh
ENSG00000253618	GRPEL2-AS1	-1.07418558482483	0.0986741175160769	up in d7 cTfh
ENSG00000198624	CCDC69	-0.603404685736249	0.0597002227673345	up in d7 cTfh
ENSG00000120129	DUSP1	1.93062564032706	1.57102039850988e-13	down in d0 cTfh
ENSG00000146066	HIGD2A	-0.557067120125296	0.0043643185272378	up in d7 cTfh
ENSG00000184840	TMED9	1.16891945820479	0.00320803706283966	down in d0 cTfh
ENSG00000113240	CLK4	0.525842652081615	0.0558540589287735	down in d0 cTfh
ENSG00000161011	SQSTM1	0.632248629488384	0.00112625248188526	down in d0 cTfh
ENSG00000124570	SERPINB6	0.968972193759891	0.0973476816513505	down in d0 cTfh
ENSG00000137285	TUBB2B	1.10907763116988	0.000116663097405966	down in d0 cTfh
ENSG00000111845	PAK1IP1	0.896449596167676	0.039336472131484	down in d0 cTfh
ENSG00000187837	HIST1H1C	-0.824987871244503	0.0322394397751456	up in d7 cTfh
ENSG00000111801	BTN3A3	-0.785713542063489	0.0832874714802216	up in d7 cTfh
ENSG00000146112	PPP1R18	-0.669285449125028	0.0448868025921026	up in d7 cTfh
ENSG00000227939	RPL3P2	1.07529650584498	4.15852333580837e-12	down in d0 cTfh
ENSG00000227507	LTB	-0.834956128974859	4.96415263269495e-05	up in d7 cTfh
ENSG00000213654	GPSM3	-0.984826645707977	3.49034285038733e-06	up in d7 cTfh
ENSG00000232629	HLA-DQB2	2.63936254939485	1.3059942984629e-08	down in d0 cTfh
ENSG00000204264	PSMB8	-0.839198196885395	2.51480014951064e-06	up in d7 cTfh
ENSG00000240065	PSMB9	-0.669651433940414	0.00235866516471583	up in d7 cTfh
ENSG00000112511	PHF1	0.861198411181177	0.00260243942463939	down in d0 cTfh
ENSG00000214810	CYCSP55	0.627608290216141	0.00185251695664421	down in d0 cTfh
ENSG00000137309	HMGA1	-0.860099518706892	0.000972283265816898	up in d7 cTfh
ENSG00000124762	CDKN1A	1.25082340102365	2.53214470127149e-09	down in d0 cTfh
ENSG00000124702	KLHDC3	-0.981934192829252	0.0433660194060301	up in d7 cTfh
ENSG00000112667	DNPH1	-0.74121528284745	0.0656739569829532	up in d7 cTfh
ENSG00000171453	POLR1C	0.94840738565961	0.000257920731266344	down in d0 cTfh
ENSG00000219163	HMGB1P20	1.33046671463333	0.0346782199949683	down in d0 cTfh
ENSG00000198225	FKBP1C	-0.913540050113774	0.00560356494212482	up in d7 cTfh
ENSG00000112773	FAM46A	1.21582506863926	0.00948207643345431	down in d0 cTfh
ENSG00000225093	RPL3P7	0.986738039821576	1.13328503903283e-10	down in d0 cTfh
ENSG00000074935	TUBE1	0.82497216618333	0.0583366016059875	down in d0 cTfh
ENSG00000111817	DSE	1.91933473820787	0.00029427576586775	down in d0 cTfh
ENSG00000189241	TSPYL1	0.538307132098646	0.090757842481331	down in d0 cTfh
ENSG00000111906	HDDC2	-0.912795291616566	0.0738183918570867	up in d7 cTfh
ENSG00000221500	SNORD100	1.35844771073878	0.0038823117397076	down in d0 cTfh
ENSG00000118515	SGK1	0.618285918315079	0.0353268416075543	down in d0 cTfh
ENSG00000027697	IFNGR1	0.761076448120022	0.00401135140550103	down in d0 cTfh
ENSG00000218996	RP1-99E18.2	0.805627770113762	0.00425313806119667	down in d0 cTfh
ENSG00000198818	SFT2D1	-0.704370509215879	0.017893527858409	up in d7 cTfh
ENSG00000235272	FAM103A2P	-0.509917427064024	0.0742301203239248	up in d7 cTfh
ENSG00000122644	ARL4A	1.07199638930014	8.80033226809755e-07	down in d0 cTfh
ENSG00000105926	MPP6	0.800697223296677	0.080875712519103	down in d0 cTfh
ENSG00000172115	CYCS	0.52750996106665	0.0071981487621512	down in d0 cTfh
ENSG00000155849	ELMO1	-0.65589673869545	0.0168709131586963	up in d7 cTfh
ENSG00000105968	H2AFV	-0.767673045278847	2.97030118517922e-06	up in d7 cTfh
ENSG00000136280	CCM2	-0.936096548625115	0.000175064612932448	up in d7 cTfh
ENSG00000126524	SBDS	0.683614581338393	0.00114763927518812	down in d0 cTfh
ENSG00000225648	SBDSP1	0.717660527494776	0.0269264609806046	down in d0 cTfh
ENSG00000146701	MDH2	-0.690098867498625	0.000491702703977987	up in d7 cTfh
ENSG00000200397	Y_RNA	0.902880574259903	0.0476276399642085	down in d0 cTfh
ENSG00000085563	ABCB1	1.57789760519649	0.00138082901416185	down in d0 cTfh
ENSG00000127922	SHFM1	-0.898861121025305	1.34063798571403e-08	up in d7 cTfh
ENSG00000266019	MIR3609	1.78090140099841	0.00100658128277875	down in d0 cTfh
ENSG00000130429	ARPC1B	-0.915520829383516	4.43567695788776e-07	up in d7 cTfh
ENSG00000106400	ZNHIT1	-0.689194567182673	0.0040663717890719	up in d7 cTfh
ENSG00000214253	FIS1	-0.517533078389979	0.0127627232229965	up in d7 cTfh
ENSG00000223886	RP11-251G23.2	-1.1180707909833	0.0880982350034845	up in d7 cTfh
ENSG00000008282	SYPL1	0.591090772098776	0.0441121545265047	down in d0 cTfh
ENSG00000253276	CCDC71L	1.12567201860547	0.0675698434758104	down in d0 cTfh
ENSG00000128590	DNAJB9	0.656910148038729	0.0261550669941486	down in d0 cTfh
ENSG00000004059	ARF5	-0.96099628642659	9.37519341132166e-06	up in d7 cTfh
ENSG00000186591	UBE2H	-0.525597873072933	0.0904640512777084	up in d7 cTfh
ENSG00000146859	TMEM140	-1.0869015066313	0.0351969098052905	up in d7 cTfh
ENSG00000105929	ATP6V0A4	-0.946570168132883	0.0980889741993735	up in d7 cTfh
ENSG00000211772	TRBC2	-1.02941197107264	5.15501509809985e-06	up in d7 cTfh
ENSG00000197448	GSTK1	-0.781264821514786	2.31668989038105e-08	up in d7 cTfh
ENSG00000231531	HINT1P1	-0.781432145734892	0.000101316318184654	up in d7 cTfh
ENSG00000201098	RNY1	1.99051044492458	2.50128818973942e-06	down in d0 cTfh
ENSG00000133574	GIMAP4	-1.13578500458279	0.00115497099799022	up in d7 cTfh
ENSG00000106615	RHEB	0.653137076772376	0.00112883907199566	down in d0 cTfh
ENSG00000005302	MSL3	-0.842606991623774	0.00171430318698968	up in d7 cTfh
ENSG00000205542	TMSB4X	-0.76659627389924	4.09757538262904e-06	up in d7 cTfh
ENSG00000147010	SH3KBP1	-0.899057423050154	3.6432420020012e-07	up in d7 cTfh
ENSG00000165169	DYNLT3	1.2004870173027	0.000322250859435065	down in d0 cTfh
ENSG00000183690	EFHC2	0.839980683937851	0.0274189733571128	down in d0 cTfh
ENSG00000224208	AL590762.6	-0.736661569149349	0.0289703350466122	up in d7 cTfh
ENSG00000147162	OGT	-0.795900971437786	0.000345806957352365	up in d7 cTfh
ENSG00000173198	CYSLTR1	1.89153190588887	0.000151682729830351	down in d0 cTfh
ENSG00000226241	LL0XNC01-221F2.2	0.917025041407319	0.0171116856059935	down in d0 cTfh
ENSG00000157514	TSC22D3	0.953189235594547	2.09135705811445e-06	down in d0 cTfh
ENSG00000175556	LONRF3	1.61733641939244	0.00445278169855564	down in d0 cTfh
ENSG00000125354	SEPT6	-0.776296082977016	0.000119566678521397	up in d7 cTfh
ENSG00000221930	FAM45BP	-1.13884872377328	0.000972283265816898	up in d7 cTfh
ENSG00000219507	FTH1P8	1.40864431353633	1.4445442268207e-07	down in d0 cTfh
ENSG00000010404	IDS	0.514851429009115	0.00061095591464523	down in d0 cTfh
ENSG00000184844	CYCSP45	0.849421794863212	1.00750438934452e-05	down in d0 cTfh
ENSG00000196976	LAGE3	-0.678179767553189	0.0137057538213569	up in d7 cTfh
ENSG00000158856	DMTN	1.19653532504393	0.0916174570967919	down in d0 cTfh
ENSG00000120889	TNFRSF10B	0.957838172924437	0.0473158238744635	down in d0 cTfh
ENSG00000226098	SEC11B	-1.08536362664042	0.000534453197497435	up in d7 cTfh
ENSG00000198363	ASPH	1.49279084709625	0.0302791378909436	down in d0 cTfh
ENSG00000253919	THAP12P7	0.650746487703873	0.0720018465895501	down in d0 cTfh
ENSG00000076554	TPD52	1.01927947756234	0.00422335680435659	down in d0 cTfh
ENSG00000104325	DECR1	-1.10613996455529	1.62231543910468e-09	up in d7 cTfh
ENSG00000253738	OTUD6B-AS1	0.657107002521887	0.0656352894308205	down in d0 cTfh
ENSG00000164919	COX6C	-0.650340225199456	0.000711721785452785	up in d7 cTfh
ENSG00000147669	POLR2K	0.708161434117515	0.00570273433965981	down in d0 cTfh
ENSG00000155090	KLF10	0.724173417657638	0.0141263614171215	down in d0 cTfh
ENSG00000147684	NDUFB9	-0.696748527840663	7.89354022387138e-06	up in d7 cTfh
ENSG00000249859	PVT1	-0.813777651884333	0.0573606180656055	up in d7 cTfh
ENSG00000105339	DENND3	2.17697751458891	3.85812055911137e-07	down in d0 cTfh
ENSG00000167702	KIFC2	1.01111592939953	0.0303557920753816	down in d0 cTfh
ENSG00000196150	ZNF250	1.55211802683265	0.00200456862608883	down in d0 cTfh
ENSG00000147872	PLIN2	-0.983350046641809	0.000120998117615223	up in d7 cTfh
ENSG00000137133	HINT2	-1.11618640558071	3.64073804507741e-06	up in d7 cTfh
ENSG00000083223	ZCCHC6	-0.790761997236443	0.00198563576571696	up in d7 cTfh
ENSG00000157303	SUSD3	-0.876060717543504	0.00726869224011998	up in d7 cTfh
ENSG00000131669	NINJ1	0.543182203272439	0.0690618812240995	down in d0 cTfh
ENSG00000158122	AAED1	0.595116965923657	0.00206874436873517	down in d0 cTfh
ENSG00000136938	ANP32B	-0.783896678567521	7.06546173406936e-05	up in d7 cTfh
ENSG00000119326	CTNNAL1	-1.2268211350089	0.0179225494668735	up in d7 cTfh
ENSG00000095397	WHRN	1.49137824768086	8.06307971851115e-05	down in d0 cTfh
ENSG00000119335	SET	-0.604395102639149	8.5422458567524e-05	up in d7 cTfh
ENSG00000176101	SSNA1	-0.746167866768972	0.0133363325944003	up in d7 cTfh
ENSG00000142102	PGGHG	1.21548544875121	0.00176740751600094	down in d0 cTfh
ENSG00000185885	IFITM1	-0.519117195557679	0.0342665551301623	up in d7 cTfh
ENSG00000177156	TALDO1	-0.593003870237243	0.0788683464278778	up in d7 cTfh
ENSG00000184545	DUSP8	1.51971190596793	0.000158774608085321	down in d0 cTfh
ENSG00000214026	MRPL23	-0.597387692150898	0.0857115215674598	up in d7 cTfh
ENSG00000181649	PHLDA2	2.42006311250522	3.08032009151302e-07	down in d0 cTfh
ENSG00000205531	NAP1L4	-0.832136432982834	0.000354210594562479	up in d7 cTfh
ENSG00000166337	TAF10	-0.731061307050645	0.000530749161316938	up in d7 cTfh
ENSG00000166387	PPFIBP2	1.93298672662246	0.000440120775019478	down in d0 cTfh
ENSG00000179119	SPTY2D1	0.552085992394531	0.0986741175160769	down in d0 cTfh
ENSG00000257043	RP11-137N23.1	0.893929295449271	0.00141859597940141	up in d7 cTfh
ENSG00000198168	SVIP	0.896127051790614	0.00119422331964738	down in d0 cTfh
ENSG00000156587	UBE2L6	-0.964073025660086	1.85619242099114e-05	up in d7 cTfh
ENSG00000211450	C11orf31	-0.510424933628093	0.0197705849650868	up in d7 cTfh
ENSG00000166900	STX3	1.33349043660758	0.054454685630509	down in d0 cTfh
ENSG00000013725	CD6	-0.875398851084876	0.00325933563586158	up in d7 cTfh
ENSG00000110448	CD5	-1.02780407988815	6.46654002734192e-05	up in d7 cTfh
ENSG00000168569	TMEM223	-0.776578651333484	0.0499877714484876	up in d7 cTfh
ENSG00000126432	PRDX5	-0.564337336954646	0.0135313276362624	up in d7 cTfh
ENSG00000172543	CTSW	1.62069183601987	0.000479322355126242	down in d0 cTfh
ENSG00000172500	FIBP	-0.711371285122006	0.0352163945145115	up in d7 cTfh
ENSG00000258297	RP11-658F2.8	1.09906995435404	0.0171720784064203	down in d0 cTfh
ENSG00000172531	PPP1CA	-1.23541245381241	6.5107717040219e-10	up in d7 cTfh
ENSG00000175567	UCP2	-0.676691836207641	0.00344318574124863	up in d7 cTfh
ENSG00000137486	ARRB1	1.60862745259414	0.0108507488609035	down in d0 cTfh
ENSG00000151366	NDUFC2	-0.804385040309195	2.69856363723799e-05	up in d7 cTfh
ENSG00000256745	RP11-680H20.1	-0.736598676489509	1.89055705854133e-05	up in d7 cTfh
ENSG00000187240	DYNC2H1	1.9113704908283	0.00159382446421159	down in d0 cTfh
ENSG00000196954	CASP4	-0.565986408034988	0.0301022261965175	up in d7 cTfh
ENSG00000109917	ZPR1	0.617602690655087	0.00260719894290016	down in d0 cTfh
ENSG00000167286	CD3D	-0.991267626199998	6.38834966995807e-09	up in d7 cTfh
ENSG00000160654	CD3G	-1.21295679358195	1.02321430713289e-06	up in d7 cTfh
ENSG00000095139	ARCN1	0.524216502374514	0.0989207312792026	down in d0 cTfh
ENSG00000019144	PHLDB1	1.36614449187583	0.0140446920492616	down in d0 cTfh
ENSG00000245869	RP11-158I9.5	-1.29211049857419	0.0273337825755329	up in d7 cTfh
ENSG00000084234	APLP2	0.847279509134794	0.000148544694246696	down in d0 cTfh
ENSG00000123240	OPTN	-0.776765679159581	0.00481338091784754	up in d7 cTfh
ENSG00000168283	BMI1	1.20817371930824	0.0102324203537432	down in d0 cTfh
ENSG00000077420	APBB1IP	-0.608680112500073	0.00348735469637075	up in d7 cTfh
ENSG00000183621	ZNF438	1.19665215037169	0.0329709408457946	down in d0 cTfh
ENSG00000198915	RASGEF1A	0.970220917272715	0.0162108848686206	down in d0 cTfh
ENSG00000272430	RP11-38L15.8	0.704174475414977	0.0217507237750521	down in d0 cTfh
ENSG00000229927	RHEBP1	1.02036849492416	0.0029957773586996	down in d0 cTfh
ENSG00000226964	RHEBP2	0.919044382255214	0.00090063656192031	down in d0 cTfh
ENSG00000204161	C10orf128	1.61849049397984	0.00566217305268531	down in d0 cTfh
ENSG00000072401	UBE2D1	0.817700788654077	0.000187639514933078	down in d0 cTfh
ENSG00000122872	ARL4AP1	1.76283799200746	0.00013606821771805	down in d0 cTfh
ENSG00000138311	ZNF365	0.808488250063796	0.0213658709016116	down in d0 cTfh
ENSG00000165732	DDX21	0.654627617283936	0.000496275180828847	down in d0 cTfh
ENSG00000122884	P4HA1	0.804684889714584	0.0537356706844795	down in d0 cTfh
ENSG00000138326	RPS24	-0.68676002086157	3.72803241355367e-07	up in d7 cTfh
ENSG00000108219	TSPAN14	-0.747751274262863	0.00294910324893566	up in d7 cTfh
ENSG00000077150	NFKB2	0.920573755589821	0.000124612157777895	down in d0 cTfh
ENSG00000171206	TRIM8	-1.41457133917692	5.7015162450762e-05	up in d7 cTfh
ENSG00000138166	DUSP5	-1.20137242255219	0.000103077795514787	up in d7 cTfh
ENSG00000228169	PPIAP19	-1.54676161796768	0.00413082548774805	up in d7 cTfh
ENSG00000228484	RP11-106M7.1	-1.83826939752374	0.0138009421299451	up in d7 cTfh
ENSG00000151553	FAM160B1	-1.841460766747	3.18281783828322e-05	up in d7 cTfh
ENSG00000119979	FAM45A	-1.26720789623161	2.71609459869566e-08	up in d7 cTfh
ENSG00000148908	RGS10	-0.706861691515313	0.00332699832676214	up in d7 cTfh
ENSG00000066468	FGFR2	-1.55390338911357	5.27478280672347e-07	up in d7 cTfh
ENSG00000065154	OAT	0.630751616612766	0.023407588306973	down in d0 cTfh
ENSG00000111674	ENO2	1.38161703254741	0.000184782091925648	down in d0 cTfh
ENSG00000272173	U47924.31	2.1439751104734	3.9762176180227e-05	down in d0 cTfh
ENSG00000178878	APOLD1	-1.51513798121582	0.000258545678728842	up in d7 cTfh
ENSG00000111348	ARHGDIB	-0.604431478931898	1.36851461353885e-05	up in d7 cTfh
ENSG00000151491	EPS8	1.01029812219669	0.0773502012597553	down in d0 cTfh
ENSG00000250166	RP11-268P4.5	-1.28835270495644	3.76510683303191e-36	up in d7 cTfh
ENSG00000258449	RP11-713N11.4	-1.17536686879503	0.0372613602865758	up in d7 cTfh
ENSG00000139168	ZCRB1	-0.827596421912531	0.000939334963097684	up in d7 cTfh
ENSG00000167553	TUBA1C	0.755567824787794	0.0125524552867629	down in d0 cTfh
ENSG00000257790	EIF4A1P4	0.796896650851133	0.013284461229956	down in d0 cTfh
ENSG00000139579	NABP2	-1.12250536631392	0.0778213703009975	up in d7 cTfh
ENSG00000175197	DDIT3	0.80622722205455	0.00257773060694729	down in d0 cTfh
ENSG00000037897	METTL1	1.2820872955487	0.0309577904781983	down in d0 cTfh
ENSG00000225422	RBMS1P1	0.908943816327278	0.0172731712358399	down in d0 cTfh
ENSG00000111605	CPSF6	-0.595662735058553	0.0754759015845019	up in d7 cTfh
ENSG00000139289	PHLDA1	1.26762391464389	9.35868978828224e-07	down in d0 cTfh
ENSG00000057704	TMCC3	1.12647020342066	0.0636243911771975	down in d0 cTfh
ENSG00000184752	NDUFA12	-0.965003154454208	0.000121195948406317	up in d7 cTfh
ENSG00000166598	HSP90B1	0.717949857702069	2.01195187304751e-05	down in d0 cTfh
ENSG00000008405	CRY1	0.813534422849522	0.00655158047898857	down in d0 cTfh
ENSG00000111229	ARPC3	-0.711972954709391	7.59327980393559e-06	up in d7 cTfh
ENSG00000186298	PPP1CC	-0.762882499700035	0.000134787502052925	up in d7 cTfh
ENSG00000150977	RILPL2	-0.809879663041752	0.000283778789805851	up in d7 cTfh
ENSG00000184209	SNRNP35	-2.13482558428702	4.58866192077279e-16	up in d7 cTfh
ENSG00000256223	ZNF10	1.30549515300369	0.00185390733815558	down in d0 cTfh
ENSG00000132963	POMP	-0.83312818560968	9.90719876877231e-06	up in d7 cTfh
ENSG00000238121	LINC00426	-1.5315881547631	0.0059834128609382	up in d7 cTfh
ENSG00000229715	EEF1DP3	1.63304124669508	0.0129309546678832	down in d0 cTfh
ENSG00000102760	RGCC	0.947249159187622	6.54056851221029e-05	down in d0 cTfh
ENSG00000120675	DNAJC15	-0.586594487185025	0.0738183918570867	up in d7 cTfh
ENSG00000230793	SMARCE1P5	-0.780180946052357	0.0689325499965627	up in d7 cTfh
ENSG00000225131	PSME2P2	-0.521677793174875	0.0558540589287735	up in d7 cTfh
ENSG00000102786	INTS6	0.732669942024652	0.000711721785452785	down in d0 cTfh
ENSG00000139793	MBNL2	0.674266626377332	0.0330875406934757	down in d0 cTfh
ENSG00000134900	TPP2	-0.526503492182897	0.0575432169148297	up in d7 cTfh
ENSG00000198805	PNP	0.913899899028658	8.03128354571334e-06	down in d0 cTfh
ENSG00000277734	TRAC	-0.862720852002033	3.75206704322965e-08	up in d7 cTfh
ENSG00000129460	NGDN	0.508513060991515	0.0247958678685435	down in d0 cTfh
ENSG00000092010	PSME1	-0.795148640453255	1.63240175716286e-06	up in d7 cTfh
ENSG00000100911	PSME2	-0.570176916471148	0.00520411689453816	up in d7 cTfh
ENSG00000092330	TINF2	0.746766852898225	0.00948180894174209	down in d0 cTfh
ENSG00000129518	EAPP	-0.902866175318991	1.55545183053177e-05	up in d7 cTfh
ENSG00000206596	RNU1-27P	1.22796872012231	0.000150499865482404	down in d0 cTfh
ENSG00000100906	NFKBIA	1.08156463584827	3.24405539948639e-08	down in d0 cTfh
ENSG00000023608	SNAPC1	0.80645557423945	0.0329144982634623	down in d0 cTfh
ENSG00000183648	NDUFB1	-0.689172981125184	0.000152528106280372	up in d7 cTfh
ENSG00000234648	AL162151.3	1.11861710521348	1.53760398184573e-07	down in d0 cTfh
ENSG00000258512	LINC00239	-1.55275965935874	0.000829460153233206	up in d7 cTfh
ENSG00000156411	C14orf2	-0.512482909021538	0.00570273433965981	up in d7 cTfh
ENSG00000224078	SNHG14	1.14779832421674	0.00977288610444815	down in d0 cTfh
ENSG00000182117	NOP10	-0.606182985472109	0.0228297965505163	up in d7 cTfh
ENSG00000140264	SERF2	-0.522425202169436	0.000704749575548261	up in d7 cTfh
ENSG00000259781	RP11-673C5.1	-1.03499237659088	2.2385019365763e-11	up in d7 cTfh
ENSG00000178741	COX5A	-0.733043724107494	0.00133149057385307	up in d7 cTfh
ENSG00000214646	RP11-114H24.4	-1.23215932771914	0.0408851506101377	up in d7 cTfh
ENSG00000041357	PSMA4	-0.680834311118457	0.00623218763251938	up in d7 cTfh
ENSG00000140612	SEC11A	-0.903215566858762	2.63425717060829e-07	up in d7 cTfh
ENSG00000073417	PDE8A	1.12430226090008	0.0611999376055799	down in d0 cTfh
ENSG00000182768	NGRN	0.669361084817382	0.0169392333479283	down in d0 cTfh
ENSG00000253954	HMGN1P38	-1.18528223622883	1.51156637380277e-05	up in d7 cTfh
ENSG00000258741	RP11-386M24.4	-0.807213924636133	0.000314722405939564	up in d7 cTfh
ENSG00000259706	HSP90B2P	0.8270005657545	2.26862890080358e-05	down in d0 cTfh
ENSG00000103202	NME4	1.76805407935148	0.000824090036353182	down in d0 cTfh
ENSG00000140983	RHOT2	0.842224261398003	0.00938343334919757	down in d0 cTfh
ENSG00000219274	RPS20P2	1.01514088298516	5.20508338961416e-08	down in d0 cTfh
ENSG00000074071	MRPS34	-0.908973073210069	0.000898851265004836	up in d7 cTfh
ENSG00000140990	NDUFB10	-1.01138621785247	9.55802918378523e-07	up in d7 cTfh
ENSG00000103363	TCEB2	-0.539982621214315	0.00206874436873517	up in d7 cTfh
ENSG00000103145	HCFC1R1	-0.598712016736911	0.0990233184871973	up in d7 cTfh
ENSG00000008517	IL32	-1.09360651205355	3.70362130783453e-06	up in d7 cTfh
ENSG00000103429	BFAR	-0.617431305752655	0.0845360331626025	up in d7 cTfh
ENSG00000185864	NPIPB4	-0.523743932881045	0.0228297965505163	up in d7 cTfh
ENSG00000140740	UQCRC2	-1.11708750033062	9.28982174860897e-09	up in d7 cTfh
ENSG00000260727	SLC7A5P1	1.13654192642066	0.0350545251721216	down in d0 cTfh
ENSG00000149923	PPP4C	-0.78426146880846	0.000679323601789876	up in d7 cTfh
ENSG00000090238	YPEL3	-0.755655737461507	3.209477974832e-06	up in d7 cTfh
ENSG00000180096	SEPT1	-0.885279346412424	0.00287508961182996	up in d7 cTfh
ENSG00000102921	N4BP1	-0.920855345356439	2.129581011198e-05	up in d7 cTfh
ENSG00000125148	MT2A	-0.874602520746997	0.0010986358383761	up in d7 cTfh
ENSG00000169715	MT1E	-2.17445132901386	7.86514084228549e-05	up in d7 cTfh
ENSG00000198417	MT1F	-1.89987041036368	0.000643542996738516	up in d7 cTfh
ENSG00000051108	HERPUD1	0.61872310790536	0.0101345178382518	down in d0 cTfh
ENSG00000168286	THAP11	0.875500008856462	0.0623304341967886	down in d0 cTfh
ENSG00000181019	NQO1	-1.1512318632684	0.0248295768702158	up in d7 cTfh
ENSG00000157349	DDX19B	-0.567805275989492	0.0746794305021204	up in d7 cTfh
ENSG00000153774	CFDP1	-0.612799814246499	0.0465619467118258	up in d7 cTfh
ENSG00000141002	TCF25	0.633688222185877	0.000549490069836911	down in d0 cTfh
ENSG00000244097	RPS4XP17	0.894504794717796	0.0241726612181543	down in d0 cTfh
ENSG00000108953	YWHAE	-0.576866892629841	0.00261965157773434	up in d7 cTfh
ENSG00000083457	ITGAE	-0.860205762583128	0.00280176943674039	up in d7 cTfh
ENSG00000108523	RNF167	-0.737285614347246	0.0612125687185922	up in d7 cTfh
ENSG00000108518	PFN1	-1.03178424653521	4.16454099123633e-07	up in d7 cTfh
ENSG00000205544	TMEM256	-0.93684476577423	0.00251375227059891	up in d7 cTfh
ENSG00000252835	SCARNA21	2.44170178626181	1.80149068343101e-08	down in d0 cTfh
ENSG00000170043	TRAPPC1	-0.823378234843565	0.00115975402212636	up in d7 cTfh
ENSG00000125434	SLC25A35	-1.29204822390357	0.0172739281929158	up in d7 cTfh
ENSG00000007237	GAS7	1.98035969114988	0.000140043831523105	down in d0 cTfh
ENSG00000109083	IFT20	-0.783401456088994	0.00971101484745965	up in d7 cTfh
ENSG00000108578	BLMH	-1.04681804630993	0.0819029449859659	up in d7 cTfh
ENSG00000185862	EVI2B	-0.988927652186763	1.85215645368644e-05	up in d7 cTfh
ENSG00000271503	CCL5	1.16823851005673	0.0237743134128467	down in d0 cTfh
ENSG00000277791	PSMB3	-0.620343991193339	0.00748122616403543	up in d7 cTfh
ENSG00000159111	MRPL10	-1.2786086765017	0.000152772326740631	up in d7 cTfh
ENSG00000141232	TOB1	0.733116084859313	0.00154582762817668	down in d0 cTfh
ENSG00000136490	LIMD2	-1.00121693111416	2.64218096428117e-07	up in d7 cTfh
ENSG00000267023	LRRC37A16P	0.801777643770419	0.0220447866711905	down in d0 cTfh
ENSG00000184640	SEPT9	-0.858760464385947	0.00144935943778575	up in d7 cTfh
ENSG00000176845	METRNL	1.57129101902103	6.85916898544765e-06	down in d0 cTfh
ENSG00000207034	Y_RNA	1.03209802517261	0.0247990794970069	down in d0 cTfh
ENSG00000177426	TGIF1	1.00418074879672	0.00176931025406847	down in d0 cTfh
ENSG00000049759	NEDD4L	1.74025118220704	0.00709342421573956	down in d0 cTfh
ENSG00000171791	BCL2	1.01776464256297	0.000262754975562295	down in d0 cTfh
ENSG00000088832	FKBP1A	-0.680145911401203	0.00995194021929118	up in d7 cTfh
ENSG00000101224	CDC25B	-0.934254081471144	0.00820558324057424	up in d7 cTfh
ENSG00000132661	NXT1	1.09109434568622	3.92645393823611e-06	down in d0 cTfh
ENSG00000149531	FRG1BP	-0.880942666011203	0.0270075588600942	up in d7 cTfh
ENSG00000125970	RALY	-0.723800636490978	0.000449612561946571	up in d7 cTfh
ENSG00000241229	RN7SL443P	-1.30714349347891	0.0752367597998241	up in d7 cTfh
ENSG00000166913	YWHAB	-0.836737831320549	1.481742197157e-10	up in d7 cTfh
ENSG00000278231	RP5-906C1.1	-1.25975720575235	0.00552027485008532	up in d7 cTfh
ENSG00000124097	HMGB1P1	-0.517939155249207	0.0451660481104995	up in d7 cTfh
ENSG00000124172	ATP5E	-0.759149428700604	5.94538325470076e-05	up in d7 cTfh
ENSG00000124203	ZNF831	-0.948206762618807	0.00136420832314414	up in d7 cTfh
ENSG00000101193	GID8	-0.665045667571923	0.0989207312792026	up in d7 cTfh
ENSG00000232442	CTD-3184A7.4	-0.898867965361843	0.00420286485388225	up in d7 cTfh
ENSG00000070388	FGF22	-1.19852499262476	0.0473926595355803	up in d7 cTfh
ENSG00000064666	CNN2	-1.31713813204199	3.13770519922803e-07	up in d7 cTfh
ENSG00000099624	ATP5D	-0.510458772598856	0.014469937819492	up in d7 cTfh
ENSG00000099800	TIMM13	-0.674015274939162	0.0458961254378537	up in d7 cTfh
ENSG00000183617	MRPL54	-0.54912545076499	0.0118116579616967	up in d7 cTfh
ENSG00000130254	SAFB2	0.519572086128187	0.0709846657143594	down in d0 cTfh
ENSG00000174886	NDUFA11	-0.857994438608144	3.49034285038733e-06	up in d7 cTfh
ENSG00000267589	CTC-232P5.4	1.7302673050418	1.36296291677204e-05	down in d0 cTfh
ENSG00000229833	PET100	-0.752858379423657	4.16140641781608e-05	up in d7 cTfh
ENSG00000185236	RAB11B	-0.52733340462427	0.0773550630862641	up in d7 cTfh
ENSG00000099785	MARCH2	-0.90753193416981	0.058304517320775	up in d7 cTfh
ENSG00000167815	PRDX2	-0.653860486682049	0.00357508568373652	up in d7 cTfh
ENSG00000179218	CALR	0.577909026998494	0.017893527858409	down in d0 cTfh
ENSG00000099795	NDUFB7	-0.738873020111513	0.00225320550604356	up in d7 cTfh
ENSG00000214046	SMIM7	-0.650477833129756	0.0168861211048299	up in d7 cTfh
ENSG00000130303	BST2	-0.821610602945731	0.00774079138698926	up in d7 cTfh
ENSG00000130313	PGLS	-0.76176693501022	0.0933244636457034	up in d7 cTfh
ENSG00000105639	JAK3	-1.01861065984255	3.31567021644605e-05	up in d7 cTfh
ENSG00000081665	ZNF506	1.60959822241086	9.90888498324912e-07	down in d0 cTfh
ENSG00000271109	CTC-523E23.11	-0.904682991703104	0.0996556568319198	up in d7 cTfh
ENSG00000126267	COX6B1	-0.570425085308705	0.00243167103523296	up in d7 cTfh
ENSG00000011590	ZBTB32	-1.52406618870597	0.00921421585976163	up in d7 cTfh
ENSG00000104823	ECH1	-0.708787447439177	0.000498994219690305	up in d7 cTfh
ENSG00000130755	GMFG	-0.972173267561474	3.42230666205438e-10	up in d7 cTfh
ENSG00000128016	ZFP36	1.07917497830119	5.67869680791343e-10	down in d0 cTfh
ENSG00000239868	RN7SL34P	1.71640164391641	0.00096548493544455	down in d0 cTfh
ENSG00000105722	ERF	1.01913222460501	0.0942191210115851	down in d0 cTfh
ENSG00000105755	ETHE1	-0.9836106989911	0.0421501986260612	up in d7 cTfh
ENSG00000007255	TRAPPC6A	-0.531594582721597	0.038975725875674	up in d7 cTfh
ENSG00000042753	AP2S1	-1.17403834274438	2.90662322294059e-06	up in d7 cTfh
ENSG00000130748	TMEM160	-0.768494459620759	0.0243391777936289	up in d7 cTfh
ENSG00000142230	SAE1	-1.20149556957872	0.000497477138882774	up in d7 cTfh
ENSG00000087074	PPP1R15A	1.36901455886992	4.24726270492383e-07	down in d0 cTfh
ENSG00000142546	NOSIP	-1.17771270434848	5.52110909152222e-10	up in d7 cTfh
ENSG00000131408	NR1H2	0.981389897681817	2.03919145402081e-05	down in d0 cTfh
ENSG00000121413	ZSCAN18	1.38815803175788	0.0167601628633682	down in d0 cTfh
ENSG00000240122	FABP5P11	-1.08612118930915	0.0191331272954624	up in d7 cTfh
ENSG00000128185	DGCR6L	-0.690501314139522	0.00438952067334963	up in d7 cTfh
ENSG00000183506	PI4KAP2	0.801713958353561	0.0347215508462875	down in d0 cTfh
ENSG00000213707	HMGB1P10	-0.931903748993133	2.31119880858819e-07	up in d7 cTfh
ENSG00000100219	XBP1	1.0600768225539	3.3232063277969e-05	down in d0 cTfh
ENSG00000184076	UQCR10	-0.670316688828045	1.12831016558751e-05	up in d7 cTfh
ENSG00000198832	SELM	1.25746341599132	0.000201538741857881	down in d0 cTfh
ENSG00000100348	TXN2	-0.753981004815176	0.00575580711491917	up in d7 cTfh
ENSG00000128340	RAC2	-0.616315319593734	0.00116805934006092	up in d7 cTfh
ENSG00000244509	APOBEC3C	-0.813807788076804	0.0134067080540246	up in d7 cTfh
ENSG00000100316	RPL3	0.642188715297718	1.85154600826062e-10	down in d0 cTfh
ENSG00000239900	ADSL	-1.33988219204022	1.51500343823243e-07	up in d7 cTfh
ENSG00000214727	RPL5P35	1.85748955817922	0.00115982889026438	down in d0 cTfh
ENSG00000154723	ATP5J	-0.823566694658635	0.000700271078521159	up in d7 cTfh
ENSG00000241837	ATP5O	-0.698771678031119	2.19193763090783e-06	up in d7 cTfh
ENSG00000237945	LINC00649	-1.05313494201471	0.0288305867075395	up in d7 cTfh
ENSG00000173276	ZBTB21	0.59992684376899	0.0973846905086089	down in d0 cTfh
ENSG00000160221	C21orf33	-0.939053882949302	0.00313875420067132	up in d7 cTfh
ENSG00000183570	PCBP3	-1.16865104337293	0.0474839578156923	up in d7 cTfh
ENSG00000198763	MT-ND2	1.52127789178841	5.63247715056029e-12	down in d0 cTfh
ENSG00000228253	MT-ATP8	1.04456541529275	4.38913932243152e-05	down in d0 cTfh
ENSG00000198899	MT-ATP6	0.869165576443792	0.000432707757281384	down in d0 cTfh
ENSG00000198840	MT-ND3	1.18969891562697	1.61944288510756e-06	down in d0 cTfh
ENSG00000212907	MT-ND4L	1.39350329699916	2.44779664434394e-07	down in d0 cTfh
ENSG00000198886	MT-ND4	0.962847759625278	0.000225904881315025	down in d0 cTfh
ENSG00000198786	MT-ND5	1.1564647631291	4.79347016987742e-10	down in d0 cTfh
ENSG00000198695	MT-ND6	1.26077363583884	6.00823501254069e-08	down in d0 cTfh
ENSG00000198727	MT-CYB	0.99973366636623	1.13052536280906e-05	down in d0 cTfh
