# Supplementary material for: Impaired HA-specific T follicular helper cell and antibody responses to influenza vaccination are linked to inflammation in humans
Source: eLife. 2021 Nov 2;10:e70554. doi: 10.7554/eLife.70554 (PMC8562996; doi:10.7554/eLife.70554)
Supplement: Source data 5. [file elife-70554-supp9.csv]

	gene	log2FoldChange	padj	gene.sign
ENSG00000225630	MTND2P28	1.04323994213837	6.0090404479914e-05	down in d0 cTfh
ENSG00000162413	KLHL21	0.668770243798486	0.0571690516231109	down in d0 cTfh
ENSG00000142657	PGD	0.865294397104291	0.0400918647061742	down in d0 cTfh
ENSG00000162496	DHRS3	1.18460939321621	0.0253638611990985	down in d0 cTfh
ENSG00000211454	AKR7L	-1.61227735166787	0.00741030555731672	up in d7 cTfh
ENSG00000162482	AKR7A3	-1.20401557432219	0.0874148550475408	up in d7 cTfh
ENSG00000053371	AKR7A2	-0.822421829426498	0.0579245069583642	up in d7 cTfh
ENSG00000077549	CAPZB	-0.722458474882953	1.30936115977355e-05	up in d7 cTfh
ENSG00000004487	KDM1A	1.03290361854514	0.00180419684456408	down in d0 cTfh
ENSG00000020633	RUNX3	0.623584276763207	0.00852806794928475	down in d0 cTfh
ENSG00000117643	MAN1C1	1.99999816018025	5.77356664194107e-05	down in d0 cTfh
ENSG00000169442	CD52	-0.672104181115738	5.28625437158372e-05	up in d7 cTfh
ENSG00000117748	RPA2	0.745871899175757	0.0293461826527226	down in d0 cTfh
ENSG00000264078	RP11-73M7.9	1.2218646482076	0.0614389379285119	down in d0 cTfh
ENSG00000203325	RP11-277A4.4	1.18642810246046	0.0466276770135229	down in d0 cTfh
ENSG00000025800	KPNA6	0.956501702751068	0.00100654602781632	down in d0 cTfh
ENSG00000116514	RNF19B	0.861909285823463	0.00163651377980492	down in d0 cTfh
ENSG00000163874	ZC3H12A	0.797643072189275	0.00912097001175549	down in d0 cTfh
ENSG00000236876	TMSB4XP1	-0.636328675986348	0.00285524361574614	up in d7 cTfh
ENSG00000070759	TESK2	1.24702886433612	0.0588089120713382	down in d0 cTfh
ENSG00000132849	PATJ	0.808414520471511	0.066099427906392	down in d0 cTfh
ENSG00000213625	LEPROT	1.04009082729766	0.0108247178664581	down in d0 cTfh
ENSG00000162642	C1orf52	0.727900670400591	0.00223951920167122	down in d0 cTfh
ENSG00000117226	GBP3	1.04040782544605	0.059733880212301	down in d0 cTfh
ENSG00000162645	GBP2	-0.647224210932624	0.00936419661281197	up in d7 cTfh
ENSG00000261654	RP11-96K19.4	1.1894738621963	0.0298917115173003	down in d0 cTfh
ENSG00000162777	DENND2D	-0.8611837126024	0.0135450279085141	up in d7 cTfh
ENSG00000134250	NOTCH2	0.917395423602592	0.0017894141472695	down in d0 cTfh
ENSG00000272419	RP11-403I13.8	1.39065766512258	0.00670970780847427	down in d0 cTfh
ENSG00000272150	NBPF25P	0.803995359546003	0.00351504833680038	down in d0 cTfh
ENSG00000265972	TXNIP	0.967872729919391	0.0154839628385851	down in d0 cTfh
ENSG00000268043	NBPF12	0.650858756921994	0.037031082744433	down in d0 cTfh
ENSG00000263956	NBPF11	0.709166570579992	0.00762221128682306	down in d0 cTfh
ENSG00000270629	NBPF14	0.701255988007058	0.000170058770287837	down in d0 cTfh
ENSG00000143382	ADAMTSL4	1.16976787996752	0.0617560138181135	down in d0 cTfh
ENSG00000225556	C2CD4D	1.33456059528475	0.00298851180870692	down in d0 cTfh
ENSG00000203761	MSTO2P	1.50187462321428	0.00646993021856624	down in d0 cTfh
ENSG00000116586	LAMTOR2	-0.574631947767057	0.0751398595076717	up in d7 cTfh
ENSG00000160789	LMNA	0.680684636395083	0.0846167803991591	down in d0 cTfh
ENSG00000132694	ARHGEF11	1.40837092095634	0.00548382408021392	down in d0 cTfh
ENSG00000188404	SELL	-0.67007959282319	0.0158821568962758	up in d7 cTfh
ENSG00000233328	PFN1P1	-0.587497222141822	0.0252041302018879	up in d7 cTfh
ENSG00000143333	RGS16	1.01029955281082	0.0180609255813869	down in d0 cTfh
ENSG00000116679	IVNS1ABP	0.554127663353156	0.0111829529341609	down in d0 cTfh
ENSG00000090104	RGS1	0.763431242916201	0.00425681204008338	down in d0 cTfh
ENSG00000201944	SNORA72	1.110931232231	0.00483738405642152	down in d0 cTfh
ENSG00000162894	FCMR	-0.884208346620511	2.14312361613748e-05	up in d7 cTfh
ENSG00000143507	DUSP10	0.727841509015543	0.0361659900599256	down in d0 cTfh
ENSG00000182827	ACBD3	1.03025520351551	1.21296079759082e-05	down in d0 cTfh
ENSG00000143799	PARP1	-0.69264136138932	0.0314561209351603	up in d7 cTfh
ENSG00000143674	RP5-862P8.2	0.750546685314266	0.00519699719689904	down in d0 cTfh
ENSG00000213026	CFL1P4	-0.633701962232779	0.00833870519655071	up in d7 cTfh
ENSG00000188765	TMSB4XP2	-0.576426023693643	0.00900602324455561	up in d7 cTfh
ENSG00000115738	ID2	0.99547806215807	5.7316504531291e-05	down in d0 cTfh
ENSG00000071575	TRIB2	-1.18956722239746	0.0120679866879533	up in d7 cTfh
ENSG00000115825	PRKD3	0.764237875975693	0.0886540210189007	down in d0 cTfh
ENSG00000163171	CDC42EP3	0.52831719840515	0.0718841221232267	down in d0 cTfh
ENSG00000143891	GALM	-1.07074060882608	0.0475517428281748	up in d7 cTfh
ENSG00000152518	ZFP36L2	0.538756347633024	0.00673166586929562	down in d0 cTfh
ENSG00000169764	UGP2	0.699879907510066	0.050880610603594	down in d0 cTfh
ENSG00000124357	NAGK	1.06823497684195	9.97728044062847e-06	down in d0 cTfh
ENSG00000186854	TRABD2A	1.87420839524794	1.04719889703031e-05	down in d0 cTfh
ENSG00000230606	AC159540.1	0.846575086829621	0.0108259406525053	down in d0 cTfh
ENSG00000144182	LIPT1	1.1623622044211	0.0382490657986793	down in d0 cTfh
ENSG00000115514	TXNDC9	-0.673979138679818	0.0529015155969077	up in d7 cTfh
ENSG00000169756	LIMS1	-0.968830299861464	0.000730179359198727	up in d7 cTfh
ENSG00000153094	BCL2L11	-0.827990938677412	0.0154839628385851	up in d7 cTfh
ENSG00000172965	MIR4435-2HG	-1.22716753551155	0.00024885939703949	up in d7 cTfh
ENSG00000240350	AC017002.1	-0.901701385615605	0.0699896426532535	up in d7 cTfh
ENSG00000144136	SLC20A1	0.77670909042138	0.000624026139838791	down in d0 cTfh
ENSG00000088179	PTPN4	1.12074976755522	0.000303106707600357	down in d0 cTfh
ENSG00000136732	GYPC	-0.702595199349571	0.011782160770345	up in d7 cTfh
ENSG00000173272	MZT2A	-0.514020239563063	0.0240932958022952	up in d7 cTfh
ENSG00000076003	MCM6	-0.822179383599596	0.00265522194217683	up in d7 cTfh
ENSG00000121966	CXCR4	0.960741818598203	2.04323052991512e-06	down in d0 cTfh
ENSG00000168280	KIF5C	0.951398725191884	0.0794890891377042	down in d0 cTfh
ENSG00000123612	ACVR1C	0.763012962322123	0.0774874047139808	down in d0 cTfh
ENSG00000153250	RBMS1	0.513783398542501	0.0350227322289848	down in d0 cTfh
ENSG00000163002	NUP35	1.00473084433574	0.0323596009780152	down in d0 cTfh
ENSG00000138449	SLC40A1	1.54277658232666	0.0114509543441725	down in d0 cTfh
ENSG00000119004	CYP20A1	0.517944870450296	0.0618793249846788	down in d0 cTfh
ENSG00000074582	BCS1L	1.06668791013685	0.0375851395316125	down in d0 cTfh
ENSG00000163359	COL6A3	-1.29009205940329	0.0835781477223124	up in d7 cTfh
ENSG00000178623	GPR35	1.78020414693594	2.03616528420854e-05	down in d0 cTfh
ENSG00000115685	PPP1R7	-0.575853914991115	0.00831462912288362	up in d7 cTfh
ENSG00000188389	PDCD1	-2.60276619267428	2.30872942329995e-10	up in d7 cTfh
ENSG00000214073	RPL21P17	0.661863666851949	0.0409773919872272	down in d0 cTfh
ENSG00000134107	BHLHE40	1.22999131021388	0.000185173248494185	down in d0 cTfh
ENSG00000157036	EXOG	0.903699730032169	0.0370353421274633	down in d0 cTfh
ENSG00000163812	ZDHHC3	-0.819318800091029	0.0809306165923108	up in d7 cTfh
ENSG00000178038	ALS2CL	1.27508769970265	0.00529045485500511	down in d0 cTfh
ENSG00000259956	RBM15B	0.780512371144389	0.0895516586364018	down in d0 cTfh
ENSG00000163932	PRKCD	0.69517850960889	0.0628835889475873	down in d0 cTfh
ENSG00000189283	FHIT	1.24375963365862	0.0171855843970782	down in d0 cTfh
ENSG00000113966	ARL6	1.09784113141966	0.0159120681414112	down in d0 cTfh
ENSG00000244153	WWP1P1	1.19348153121486	0.0337968547240367	down in d0 cTfh
ENSG00000144802	NFKBIZ	0.516567858306523	0.0232271932450549	down in d0 cTfh
ENSG00000144824	PHLDB2	0.893433294204195	0.0926314741695116	down in d0 cTfh
ENSG00000174500	GCSAM	1.11454865322293	0.00860422131866018	down in d0 cTfh
ENSG00000181847	TIGIT	-1.13858281151725	0.0168423325615491	up in d7 cTfh
ENSG00000031081	ARHGAP31	1.05633389550957	0.0202626649040638	down in d0 cTfh
ENSG00000163406	SLC15A2	0.88160397116786	0.000658360675895739	down in d0 cTfh
ENSG00000114544	SLC41A3	1.03876318138188	0.0296259669101151	down in d0 cTfh
ENSG00000174579	MSL2	0.805772244922949	0.0169396418779629	down in d0 cTfh
ENSG00000181804	SLC9A9	-0.954855415406253	0.0866730169882067	up in d7 cTfh
ENSG00000154310	TNIK	-0.59825131528976	0.0468293343876897	up in d7 cTfh
ENSG00000178222	RNF212	0.861281519029669	0.0740982552546306	down in d0 cTfh
ENSG00000013810	TACC3	-0.84953562594484	0.010638280823362	up in d7 cTfh
ENSG00000123933	MXD4	-1.07075877282634	9.15487290001859e-05	up in d7 cTfh
ENSG00000173011	TADA2B	0.839238630375472	0.0541638329827478	down in d0 cTfh
ENSG00000247193	RP11-431M7.3	-1.81608139127367	0.0104374829754684	up in d7 cTfh
ENSG00000109790	KLHL5	1.32407060418571	0.000103405876158822	down in d0 cTfh
ENSG00000163683	SMIM14	1.85891733767944	2.33929210700785e-06	down in d0 cTfh
ENSG00000248780	ARL4AP2	0.629183738793215	0.0109029333450064	down in d0 cTfh
ENSG00000273369	RP11-700J17.1	0.663537475863784	0.0359195756699159	down in d0 cTfh
ENSG00000145247	OCIAD2	-0.673697087956179	0.0020396144563766	up in d7 cTfh
ENSG00000128040	SPINK2	1.11743613259418	0.0407068564872587	down in d0 cTfh
ENSG00000018189	RUFY3	0.897407213375276	0.0943640007359986	down in d0 cTfh
ENSG00000163743	RCHY1	0.640645474501787	0.0835878533433622	down in d0 cTfh
ENSG00000138674	SEC31A	0.618769057716071	0.0484461553975576	down in d0 cTfh
ENSG00000185477	GPRIN3	0.560433857874293	0.087288448560098	down in d0 cTfh
ENSG00000187653	TMSB4XP8	-0.556313314614598	0.00521356829407657	up in d7 cTfh
ENSG00000138814	PPP3CA	1.30352933292403	3.83251809157427e-05	down in d0 cTfh
ENSG00000005059	MCUB	-0.5126702788417	0.000995687844601836	up in d7 cTfh
ENSG00000179387	ELMOD2	1.00324224792067	0.0694840628374588	down in d0 cTfh
ENSG00000164163	ABCE1	0.567176153145073	0.0506758634901062	down in d0 cTfh
ENSG00000256043	CTSO	0.953550305648497	0.0714091070959339	down in d0 cTfh
ENSG00000164104	HMGB2	-0.675878840873165	0.000188298368352153	up in d7 cTfh
ENSG00000168564	CDKN2AIP	0.998243239926494	0.0387951392270748	down in d0 cTfh
ENSG00000164305	CASP3	-0.561679538493087	0.0731628325318721	up in d7 cTfh
ENSG00000151729	SLC25A4	1.45983463173506	0.00042151924481427	down in d0 cTfh
ENSG00000250848	CTD-2083E4.5	-1.4032243495526	0.00538551531183875	up in d7 cTfh
ENSG00000206077	ZDHHC11B	1.63688388726227	0.00524739212595552	down in d0 cTfh
ENSG00000168685	IL7R	0.903251260247683	0.000112743360844834	down in d0 cTfh
ENSG00000171522	PTGER4	0.557539373394447	0.00645989654768083	down in d0 cTfh
ENSG00000085231	AK6	0.630412262790566	0.0540734512658901	down in d0 cTfh
ENSG00000250138	RP11-848G14.5	1.66519771807814	0.017242327346554	down in d0 cTfh
ENSG00000251158	RP11-98J23.1	1.3192083008081	0.0955612284717043	down in d0 cTfh
ENSG00000196302	RP11-497H16.5	1.12299452446793	0.0239593153932727	down in d0 cTfh
ENSG00000235558	RP11-1198D22.1	1.11379186175126	0.0205573319534951	up in d7 cTfh
ENSG00000213763	ACTBP2	-0.771997942747415	0.0169109971591388	up in d7 cTfh
ENSG00000247828	TMEM161B-AS1	0.907965076487565	0.0699896426532535	down in d0 cTfh
ENSG00000248734	CTD-2260A17.1	1.8677733841884	0.000188476423901612	down in d0 cTfh
ENSG00000164209	SLC25A46	-1.13259528365898	0.0122013539372353	up in d7 cTfh
ENSG00000133835	HSD17B4	0.810769777935455	0.0748373071127119	down in d0 cTfh
ENSG00000178913	TAF7	0.511386556638845	0.0144887309466637	down in d0 cTfh
ENSG00000113555	PCDH12	0.89057144576021	0.0845525632500333	down in d0 cTfh
ENSG00000113272	THG1L	1.04453308647022	0.0557765918386772	down in d0 cTfh
ENSG00000048162	NOP16	0.796110672863983	0.0194906978003912	down in d0 cTfh
ENSG00000112149	CD83	1.42979598015928	1.37453816415359e-06	down in d0 cTfh
ENSG00000229646	RP11-330A16.1	-1.99222477900053	0.00116948497048703	up in d7 cTfh
ENSG00000197279	ZNF165	0.857225896516587	0.0773116529947173	down in d0 cTfh
ENSG00000213654	GPSM3	-0.600232103384753	0.00823812036099846	up in d7 cTfh
ENSG00000112511	PHF1	0.669786746415519	0.0248865464217323	down in d0 cTfh
ENSG00000124762	CDKN1A	1.02182218491139	1.69542826893095e-06	down in d0 cTfh
ENSG00000198937	CCDC167	-0.571777135456234	0.0543943309874177	up in d7 cTfh
ENSG00000183137	CEP57L1	0.796730251356507	0.0883241720702399	down in d0 cTfh
ENSG00000146350	TBC1D32	0.958242083896298	0.0323596009780152	down in d0 cTfh
ENSG00000079819	EPB41L2	1.08570190542489	0.0588089120713382	down in d0 cTfh
ENSG00000200534	SNORA33	0.837212646317376	0.0695955320313783	down in d0 cTfh
ENSG00000237499	RP11-356I2.4	0.983004088524006	0.0102438142122466	down in d0 cTfh
ENSG00000118503	TNFAIP3	1.24848400964413	1.52035750292633e-09	down in d0 cTfh
ENSG00000112378	PERP	0.931342444022367	0.0751022525495871	down in d0 cTfh
ENSG00000024862	CCDC28A	-0.526838234545688	0.0535565976557573	up in d7 cTfh
ENSG00000135597	REPS1	0.77239999600483	0.0886141996294469	down in d0 cTfh
ENSG00000213089	PDCL3P5	-0.917317837024464	0.00520099411872384	up in d7 cTfh
ENSG00000279355	AGPAT4-IT1	1.72300962005992	0.000166856482423475	down in d0 cTfh
ENSG00000075624	ACTB	-0.614006626350891	0.000832738479439517	up in d7 cTfh
ENSG00000122644	ARL4A	0.596110896847643	0.012712653489067	down in d0 cTfh
ENSG00000106546	AHR	1.35236662367597	0.000169731922901433	down in d0 cTfh
ENSG00000070882	OSBPL3	0.789483415426088	0.0312396508916104	down in d0 cTfh
ENSG00000006451	RALA	0.792374524261379	0.0103951264287878	down in d0 cTfh
ENSG00000259826	RP11-467D6.1	0.879167711605264	0.0806104995043305	down in d0 cTfh
ENSG00000106603	COA1	-0.64994913917134	0.0416515463513124	up in d7 cTfh
ENSG00000232956	SNHG15	0.566856782372267	0.00939943378080301	down in d0 cTfh
ENSG00000136273	HUS1	0.633284927262697	0.042608648071374	down in d0 cTfh
ENSG00000183696	UPP1	0.86821859835734	0.000180299830214572	down in d0 cTfh
ENSG00000146701	MDH2	-0.560303340535738	0.00569257305296849	up in d7 cTfh
ENSG00000200397	Y_RNA	0.848235576027365	0.0581871792862773	down in d0 cTfh
ENSG00000006453	BAIAP2L1	1.04700079559787	0.00620555547356788	down in d0 cTfh
ENSG00000266019	MIR3609	1.38220421466641	0.0227640453984981	down in d0 cTfh
ENSG00000130429	ARPC1B	-0.658524291285498	0.000482814551773017	up in d7 cTfh
ENSG00000146830	GIGYF1	1.65778649894971	0.000148553162359732	down in d0 cTfh
ENSG00000177683	THAP5	1.20446750064329	0.0115828305986317	down in d0 cTfh
ENSG00000004866	ST7	1.73185671376768	0.00108786038184873	down in d0 cTfh
ENSG00000179562	GCC1	0.880725186599115	0.0551151306949675	down in d0 cTfh
ENSG00000197157	SND1	0.770220902122911	0.0724796623024568	down in d0 cTfh
ENSG00000128595	CALU	0.756574886058885	0.0448898527455628	down in d0 cTfh
ENSG00000230626	RP11-286H14.4	-0.858230918481838	0.0328697606969059	up in d7 cTfh
ENSG00000197448	GSTK1	-0.684688883910357	1.01099560393938e-06	up in d7 cTfh
ENSG00000159840	ZYX	-0.570167422519324	0.0998734998201819	up in d7 cTfh
ENSG00000201098	RNY1	1.21712458545012	0.00552975922047836	down in d0 cTfh
ENSG00000005302	MSL3	-0.624444447333567	0.0265956425921932	up in d7 cTfh
ENSG00000205542	TMSB4X	-0.522328343665477	0.00298287152830023	up in d7 cTfh
ENSG00000047634	SCML1	1.12100930239494	0.0102438142122466	down in d0 cTfh
ENSG00000165169	DYNLT3	0.658480174906469	0.0780084995748594	down in d0 cTfh
ENSG00000215301	DDX3X	0.554639903399123	0.0135891359295526	down in d0 cTfh
ENSG00000131089	ARHGEF9	1.50428218779028	0.00487808916220464	down in d0 cTfh
ENSG00000178146	RP1-232L22__B.1	-0.987925003694356	0.0838880342780552	up in d7 cTfh
ENSG00000147231	CXorf57	1.2751146134095	0.0213115390859733	down in d0 cTfh
ENSG00000183918	SH2D1A	-0.808659611240158	0.00120048119584873	up in d7 cTfh
ENSG00000147274	RBMX	0.573746001532823	0.000404890107223438	down in d0 cTfh
ENSG00000104219	ZDHHC2	0.797933674932803	0.0986826603990717	down in d0 cTfh
ENSG00000147408	CSGALNACT1	1.10846853689938	0.0230093593141211	down in d0 cTfh
ENSG00000253899	RP11-613H2.2	0.604169853021662	0.028175118209133	down in d0 cTfh
ENSG00000147526	TACC1	0.798985016023519	1.76440674576585e-05	down in d0 cTfh
ENSG00000226098	SEC11B	-0.604522598909677	0.0733868817462014	up in d7 cTfh
ENSG00000254332	GS1-44D20.1	-0.826912982410805	0.00640364768453954	up in d7 cTfh
ENSG00000164687	FABP5	-1.27310949170285	1.65813890473554e-05	up in d7 cTfh
ENSG00000104325	DECR1	-0.533207383656722	0.00897508608246696	up in d7 cTfh
ENSG00000253738	OTUD6B-AS1	0.946086950402963	0.00157812646390514	down in d0 cTfh
ENSG00000048392	RRM2B	0.819153282303679	0.0637273479099383	down in d0 cTfh
ENSG00000253320	AZIN1-AS1	-1.09497723272309	0.0988169496466553	up in d7 cTfh
ENSG00000253372	RP11-44N11.1	2.18075024028807	2.29124778036521e-10	down in d0 cTfh
ENSG00000245164	LINC00861	-0.58016712876048	0.0850959139425803	up in d7 cTfh
ENSG00000249859	PVT1	-0.836718332014801	0.0379798182786955	up in d7 cTfh
ENSG00000254275	LINC00824	1.606474603611	0.00284343316428895	down in d0 cTfh
ENSG00000179832	MROH1	1.31131610606567	0.00448664611402501	down in d0 cTfh
ENSG00000106993	CDC37L1	0.670084398606533	0.0259333420799762	down in d0 cTfh
ENSG00000147872	PLIN2	-0.793096060656316	0.00253115000582432	up in d7 cTfh
ENSG00000137133	HINT2	-0.620257088935709	0.0205343944191834	up in d7 cTfh
ENSG00000165244	ZNF367	0.953464102873954	0.0811491856277533	down in d0 cTfh
ENSG00000171159	C9orf16	-0.713223935416745	0.00135108289126391	up in d7 cTfh
ENSG00000246851	RP11-544A12.8	1.86900470950195	0.000698531878204918	down in d0 cTfh
ENSG00000053918	KCNQ1	1.14212061390314	0.0542463294587758	down in d0 cTfh
ENSG00000129757	CDKN1C	1.23812805221826	0.0503575403182964	down in d0 cTfh
ENSG00000205531	NAP1L4	-0.568251023721491	0.021870085939371	up in d7 cTfh
ENSG00000177105	RHOG	-0.683888792361837	0.00191872709133501	up in d7 cTfh
ENSG00000166340	TPP1	0.912761633569726	0.000897528770507419	down in d0 cTfh
ENSG00000212607	SNORA3B	1.11305794079729	0.0407783832142342	down in d0 cTfh
ENSG00000198168	SVIP	0.785000697755935	0.00483738405642152	down in d0 cTfh
ENSG00000110422	HIPK3	0.792674423560921	0.00558027328808786	down in d0 cTfh
ENSG00000110436	SLC1A2	1.26809996351365	0.000840778457122968	down in d0 cTfh
ENSG00000246250	RP11-613D13.5	1.28457978292955	0.0218162087879572	down in d0 cTfh
ENSG00000156587	UBE2L6	-0.630024122124784	0.00958971069892345	up in d7 cTfh
ENSG00000234964	FABP5P7	-1.12444611777032	8.84897858904638e-05	up in d7 cTfh
ENSG00000173020	GRK2	-0.779079272300186	0.0046108016891655	up in d7 cTfh
ENSG00000172531	PPP1CA	-0.97018311542002	1.69542826893095e-06	up in d7 cTfh
ENSG00000172725	CORO1B	-0.885437726702778	0.00521356829407657	up in d7 cTfh
ENSG00000175567	UCP2	-0.587059979571728	0.0116797817738899	up in d7 cTfh
ENSG00000158555	GDPD5	1.32777856358858	0.0123980162446651	down in d0 cTfh
ENSG00000158636	EMSY	0.787396529273844	0.0283987301188496	down in d0 cTfh
ENSG00000184384	MAML2	1.10142967112683	0.0123980162446651	down in d0 cTfh
ENSG00000255547	RPA2P3	1.00697764621075	0.0524364970759457	down in d0 cTfh
ENSG00000086848	ALG9	1.49352835734049	0.010240257291273	down in d0 cTfh
ENSG00000250303	RP11-356J5.12	2.53195273962112	1.47245021066144e-07	down in d0 cTfh
ENSG00000160593	JAML	1.0741174365545	0.00152656216314198	down in d0 cTfh
ENSG00000160654	CD3G	-1.12499751927572	4.6837586464947e-06	up in d7 cTfh
ENSG00000095139	ARCN1	0.526743243838972	0.0684654516115265	down in d0 cTfh
ENSG00000160683	CXCR5	-2.20456630444899	1.90202634362649e-05	up in d7 cTfh
ENSG00000245869	RP11-158I9.5	-1.62616777813835	0.00244379384412761	up in d7 cTfh
ENSG00000137642	SORL1	1.00995475831637	0.000409513614830783	down in d0 cTfh
ENSG00000154134	ROBO3	1.31050210900188	0.0390804260159838	down in d0 cTfh
ENSG00000175773	RP11-121M22.1	1.17546742059171	0.0571578221717421	up in d7 cTfh
ENSG00000165632	TAF3	0.697665499505886	0.0173802034839919	down in d0 cTfh
ENSG00000107485	GATA3	0.718146636621287	0.0484461553975576	down in d0 cTfh
ENSG00000123240	OPTN	-0.658111585004177	0.0164484890231846	up in d7 cTfh
ENSG00000026025	VIM	0.870586731277818	2.95761743533496e-07	down in d0 cTfh
ENSG00000077420	APBB1IP	-0.820080203467884	1.96468474405835e-05	up in d7 cTfh
ENSG00000188234	AGAP4	1.4455323683197	0.000351991713650589	down in d0 cTfh
ENSG00000204176	SYT15	1.20334842241435	0.0705220697420604	down in d0 cTfh
ENSG00000138311	ZNF365	1.99471801288882	5.51865414943683e-08	down in d0 cTfh
ENSG00000096746	HNRNPH3	0.519908588364129	0.00768288806103754	down in d0 cTfh
ENSG00000166321	NUDT13	0.973780828116915	0.0757625043609141	down in d0 cTfh
ENSG00000122378	FAM213A	1.05966106896329	0.0496598559684618	down in d0 cTfh
ENSG00000119977	TCTN3	1.10599860710885	0.0215274708002835	down in d0 cTfh
ENSG00000155287	SLC25A28	1.04623264706803	0.00426144768448699	down in d0 cTfh
ENSG00000272933	RP11-47A8.5	-0.818522479327856	0.0901115343612698	up in d7 cTfh
ENSG00000171206	TRIM8	-0.975575715974311	0.00725531859415325	up in d7 cTfh
ENSG00000119950	MXI1	1.19316592575503	8.84897858904638e-05	down in d0 cTfh
ENSG00000165806	CASP7	0.853505600456114	0.0724796623024568	down in d0 cTfh
ENSG00000151893	CACUL1	0.781456480916865	0.0293394384503637	down in d0 cTfh
ENSG00000066468	FGFR2	-0.696404786115972	0.0979943382613032	up in d7 cTfh
ENSG00000082805	ERC1	0.801022142924724	0.0526586129690834	down in d0 cTfh
ENSG00000139193	CD27	-1.11613594854389	2.35769417141444e-05	up in d7 cTfh
ENSG00000139182	CLSTN3	-1.22572595040588	0.0297943806437173	up in d7 cTfh
ENSG00000214851	LINC00612	1.512362615893	0.00574607642340071	down in d0 cTfh
ENSG00000256069	A2MP1	1.39993395520513	0.0212003188962848	down in d0 cTfh
ENSG00000242405	RP11-267J23.1	0.605492420033001	0.0534614497161095	down in d0 cTfh
ENSG00000246705	H2AFJ	-0.705488799280265	0.0424236881458209	up in d7 cTfh
ENSG00000118308	LRMP	-1.4433913613129	3.77123166009441e-07	up in d7 cTfh
ENSG00000184613	NELL2	1.35795651750282	0.00557034128810617	down in d0 cTfh
ENSG00000139211	AMIGO2	1.68473479322567	0.000634331845297065	down in d0 cTfh
ENSG00000167552	TUBA1A	0.662655417277835	0.000551348068620864	down in d0 cTfh
ENSG00000135503	ACVR1B	1.34001555369103	0.0150545343678946	down in d0 cTfh
ENSG00000063046	EIF4B	0.598116029012886	0.00357328246884039	down in d0 cTfh
ENSG00000170473	PYM1	-1.01732961677989	0.0308073301341796	up in d7 cTfh
ENSG00000196465	MYL6B	-1.55040341964065	0.00264121796139319	up in d7 cTfh
ENSG00000110944	IL23A	1.1851915597164	0.0140107100206231	down in d0 cTfh
ENSG00000175197	DDIT3	0.573197728062626	0.0437059747736507	down in d0 cTfh
ENSG00000258302	RP11-981P6.1	1.59860011167186	0.000738577073703089	down in d0 cTfh
ENSG00000102189	EEA1	1.28006191336701	0.00193905895229867	down in d0 cTfh
ENSG00000120833	SOCS2	1.70509809842252	0.00285673798857094	down in d0 cTfh
ENSG00000120798	NR2C1	-0.844184824251924	0.0160477771234215	up in d7 cTfh
ENSG00000198855	FICD	1.53488304747403	0.00638478928607825	down in d0 cTfh
ENSG00000186815	TPCN1	1.31037405122149	0.0164477844392649	down in d0 cTfh
ENSG00000139725	RHOF	-0.705022224129739	0.0990040466367859	up in d7 cTfh
ENSG00000150977	RILPL2	-0.923135372633684	1.6106298135367e-05	up in d7 cTfh
ENSG00000184209	SNRNP35	-1.2163612202296	1.24581290746839e-05	up in d7 cTfh
ENSG00000090615	GOLGA3	1.02656477765031	0.0373953250300025	down in d0 cTfh
ENSG00000256223	ZNF10	1.3100320544168	0.0013703806501398	down in d0 cTfh
ENSG00000238121	LINC00426	-1.40269638445495	0.0107981246893271	up in d7 cTfh
ENSG00000133106	EPSTI1	-1.0838576764857	0.0147585599694291	up in d7 cTfh
ENSG00000174032	SLC25A30	1.39173866395145	0.0140107100206231	down in d0 cTfh
ENSG00000236044	FABP5P2	-0.979863949634569	0.00232678126869483	up in d7 cTfh
ENSG00000184226	PCDH9	0.944246399786479	0.0585685349643811	down in d0 cTfh
ENSG00000102554	KLF5	0.86947223642851	0.0835781477223124	down in d0 cTfh
ENSG00000236972	FABP5P1	-1.02484106311281	0.00833870519655071	up in d7 cTfh
ENSG00000118922	KLF12	-0.556046100075226	0.0731240365066459	up in d7 cTfh
ENSG00000139793	MBNL2	0.767120577624096	0.00900602324455561	down in d0 cTfh
ENSG00000041515	MYO16	0.60412039454914	0.0996587716162043	down in d0 cTfh
ENSG00000185950	IRS2	1.37394525224963	1.68860277818985e-07	down in d0 cTfh
ENSG00000100934	SEC23A	0.909253983718659	0.00921166022416418	down in d0 cTfh
ENSG00000131981	LGALS3	0.82258051264783	0.0401606081612976	down in d0 cTfh
ENSG00000182107	TMEM30B	1.26099739128663	2.63939015441195e-09	down in d0 cTfh
ENSG00000100731	PCNX1	0.500553853167286	0.0952243943310427	down in d0 cTfh
ENSG00000119616	FCF1	1.4348763562688	4.13838886556058e-05	down in d0 cTfh
ENSG00000119684	MLH3	1.40497991438943	0.000307129215076445	down in d0 cTfh
ENSG00000170345	FOS	1.39320745846121	6.2735784255983e-06	down in d0 cTfh
ENSG00000258733	CTD-2341M24.1	1.29876567549268	0.0105905257016586	down in d0 cTfh
ENSG00000140030	GPR65	0.757748332914205	0.0499381342663952	down in d0 cTfh
ENSG00000176438	SYNE3	2.12527004836361	1.43000425568049e-06	down in d0 cTfh
ENSG00000198752	CDC42BPB	1.35681375359132	0.00686430543316075	down in d0 cTfh
ENSG00000134152	KATNBL1	1.04392755816641	0.00457510570829187	down in d0 cTfh
ENSG00000156958	GALK2	1.25544109042949	0.0162221596045917	down in d0 cTfh
ENSG00000138600	SPPL2A	-0.572887622345022	0.0201081593793699	up in d7 cTfh
ENSG00000128872	TMOD2	1.29382187485038	0.051144914830864	down in d0 cTfh
ENSG00000069974	RAB27A	-0.802063471364173	0.0014336985303757	up in d7 cTfh
ENSG00000138613	APH1B	1.35798253992844	0.00316640013518052	down in d0 cTfh
ENSG00000074621	SLC24A1	1.43007861292693	0.00472796418743314	down in d0 cTfh
ENSG00000174485	DENND4A	0.517012645593423	0.0765118756237606	down in d0 cTfh
ENSG00000138604	GLCE	1.14468828141256	0.0257732938790984	down in d0 cTfh
ENSG00000259641	PCAT29	-0.826416542760538	0.0691362019345446	up in d7 cTfh
ENSG00000172349	IL16	-0.935045580473708	0.0017894141472695	up in d7 cTfh
ENSG00000073417	PDE8A	1.16946631987587	0.0388570020740793	down in d0 cTfh
ENSG00000182054	IDH2	-0.723577347183912	0.0481776461428485	up in d7 cTfh
ENSG00000140983	RHOT2	0.621209801492799	0.0680394861219688	down in d0 cTfh
ENSG00000219274	RPS20P2	0.595895373893274	0.00451495607248145	down in d0 cTfh
ENSG00000140740	UQCRC2	-0.638501600163615	0.00244379384412761	up in d7 cTfh
ENSG00000236481	AC002331.1	0.641941008138349	4.35488159917275e-34	down in d0 cTfh
ENSG00000090238	YPEL3	-0.58401141821644	0.000463511679018098	up in d7 cTfh
ENSG00000102879	CORO1A	-0.57110587944654	0.059047439052492	up in d7 cTfh
ENSG00000180096	SEPT1	-0.932671382539613	0.00116948497048703	up in d7 cTfh
ENSG00000169715	MT1E	-2.03503553044489	0.000396118491787595	up in d7 cTfh
ENSG00000198417	MT1F	-1.18467488763989	0.0642606529936336	up in d7 cTfh
ENSG00000051108	HERPUD1	0.508258662336335	0.0378275074801982	down in d0 cTfh
ENSG00000132600	PRMT7	1.04208140588398	0.0666966595431382	down in d0 cTfh
ENSG00000178573	MAF	-1.32399711982852	2.91527652946341e-06	up in d7 cTfh
ENSG00000103187	COTL1	-0.706819309851583	0.00124965042874186	up in d7 cTfh
ENSG00000103196	CRISPLD2	1.12610374039822	0.0543535029187273	down in d0 cTfh
ENSG00000167716	WDR81	0.835002863509879	0.0447668610903342	down in d0 cTfh
ENSG00000108518	PFN1	-0.686894856160723	0.00150818837460433	up in d7 cTfh
ENSG00000252835	SCARNA21	1.94514840641937	1.63803139153664e-05	down in d0 cTfh
ENSG00000170043	TRAPPC1	-0.665675717760914	0.0104726977794638	up in d7 cTfh
ENSG00000108551	RASD1	1.06860324524868	0.0203608988626451	down in d0 cTfh
ENSG00000171928	TVP23B	0.784931084781342	0.0426367883982044	down in d0 cTfh
ENSG00000266786	LGALS9DP	-1.27068359238972	0.0164416171782324	up in d7 cTfh
ENSG00000141753	IGFBP4	-1.73537883924597	0.00769503891378013	up in d7 cTfh
ENSG00000266088	RP5-1028K7.2	-1.90052705557376	0.00270257146100228	up in d7 cTfh
ENSG00000141698	NT5C3B	1.16738588855554	0.0297551808931551	down in d0 cTfh
ENSG00000198740	ZNF652	0.889522276761302	0.0619211878333332	down in d0 cTfh
ENSG00000141232	TOB1	0.663867376093297	0.00425681204008338	down in d0 cTfh
ENSG00000136490	LIMD2	-0.796771980294324	5.62602150136427e-05	up in d7 cTfh
ENSG00000279369	RP11-51F16.1	1.02927800084508	0.033472580955673	down in d0 cTfh
ENSG00000267023	LRRC37A16P	0.629156588449561	0.0868708516846245	down in d0 cTfh
ENSG00000141576	RNF157	1.47982881365509	0.0343217178302313	down in d0 cTfh
ENSG00000184640	SEPT9	-0.674294952857564	0.0153860842730123	up in d7 cTfh
ENSG00000185504	FAAP100	1.13494389612607	0.0327933179280951	down in d0 cTfh
ENSG00000176105	YES1	1.46583518588366	0.000840376309331595	down in d0 cTfh
ENSG00000207034	Y_RNA	1.22143506124046	0.00448658923399315	down in d0 cTfh
ENSG00000279332	RP11-799B12.1	1.07047676756371	0.0120902690255908	down in d0 cTfh
ENSG00000141384	TAF4B	1.10929590893372	0.0897937446705045	down in d0 cTfh
ENSG00000265273	PGDP1	1.04028932430362	0.0788920334519284	down in d0 cTfh
ENSG00000134759	ELP2	0.653481087430935	0.0413763799969734	down in d0 cTfh
ENSG00000171791	BCL2	0.954325759234784	0.000624026139838791	down in d0 cTfh
ENSG00000132635	PCED1A	1.08974081946626	0.0275383414065531	down in d0 cTfh
ENSG00000101230	ISM1	1.32688367446988	0.000632016433261931	down in d0 cTfh
ENSG00000197586	ENTPD6	1.51774502056171	0.00108142714998026	down in d0 cTfh
ENSG00000125991	ERGIC3	-0.551855336221123	0.0371216471798156	up in d7 cTfh
ENSG00000101442	ACTR5	1.12817201770803	0.0306325242365219	down in d0 cTfh
ENSG00000124191	TOX2	-1.70328799048317	0.00802451186594903	up in d7 cTfh
ENSG00000124225	PMEPA1	0.810557912759015	0.0537617368815704	down in d0 cTfh
ENSG00000070423	RNF126	-0.972009275486978	0.000236485941201623	up in d7 cTfh
ENSG00000064666	CNN2	-1.13943148367854	1.10514946281436e-05	up in d7 cTfh
ENSG00000099800	TIMM13	-0.566483309878242	0.0766608956780376	up in d7 cTfh
ENSG00000065717	TLE2	1.58375162484555	0.00114662015242203	down in d0 cTfh
ENSG00000104964	AES	-0.849664677159103	8.74087889071493e-05	up in d7 cTfh
ENSG00000126934	MAP2K2	-0.885470057693127	0.00648676617313304	up in d7 cTfh
ENSG00000185236	RAB11B	-0.782059702535126	0.00184693877871619	up in d7 cTfh
ENSG00000188321	ZNF559	1.22501807258599	0.0140107100206231	down in d0 cTfh
ENSG00000127445	PIN1	-0.54054755799449	0.0479324776905603	up in d7 cTfh
ENSG00000213339	QTRT1	0.94725342268388	0.089123771058068	down in d0 cTfh
ENSG00000105135	ILVBL	1.11622656829397	0.0332828068029956	down in d0 cTfh
ENSG00000130518	KIAA1683	1.30078279674392	0.0173802034839919	down in d0 cTfh
ENSG00000105701	FKBP8	-0.66359317344052	0.0379727012571041	up in d7 cTfh
ENSG00000259242	AC002306.1	0.975110573388277	0.0473387882298939	down in d0 cTfh
ENSG00000268081	RP11-678G14.2	1.15236355241158	0.0504035202905421	down in d0 cTfh
ENSG00000126254	RBM42	-0.636144220185879	0.0728631894013387	up in d7 cTfh
ENSG00000104823	ECH1	-0.553447096545483	0.00809554687410357	up in d7 cTfh
ENSG00000160410	SHKBP1	-0.929720532279787	0.000990169297542913	up in d7 cTfh
ENSG00000239868	RN7SL34P	1.20989815067417	0.0545964681370725	down in d0 cTfh
ENSG00000268355	AC006129.1	0.917738405868682	0.0855719673502277	down in d0 cTfh
ENSG00000124444	ZNF576	1.41490213027145	0.0295378162276609	down in d0 cTfh
ENSG00000042753	AP2S1	-0.760186565017801	0.00459843042731862	up in d7 cTfh
ENSG00000142230	SAE1	-0.939519747358148	0.00898673612288733	up in d7 cTfh
ENSG00000142546	NOSIP	-1.13700160955091	9.27527590546137e-10	up in d7 cTfh
ENSG00000142528	ZNF473	1.0913985363414	0.0571578221717421	down in d0 cTfh
ENSG00000198464	ZNF480	1.22215697605877	0.00806003741882078	down in d0 cTfh
ENSG00000188785	ZNF548	1.12852978911171	0.011188530902362	down in d0 cTfh
ENSG00000161103	AC008132.13	1.39175645853928	0.04983589414647	down in d0 cTfh
ENSG00000100219	XBP1	0.798497100422956	0.00278813742952154	down in d0 cTfh
ENSG00000226471	CTA-292E10.6	1.41954343940887	0.00335424078801136	down in d0 cTfh
ENSG00000198832	SELM	1.07291467732281	0.00169877536055605	down in d0 cTfh
ENSG00000128340	RAC2	-0.577693812588596	0.00220435619746602	up in d7 cTfh
ENSG00000279738	RP5-1014D13.2	1.16797877386341	0.0636239113414701	up in d7 cTfh
ENSG00000100346	CACNA1I	0.981620715566906	0.0196090440986708	down in d0 cTfh
ENSG00000239900	ADSL	-1.09321294022839	2.69799506486264e-05	up in d7 cTfh
ENSG00000155304	HSPA13	0.685245368128843	0.0907996719066524	down in d0 cTfh
ENSG00000166979	EVA1C	1.42847767113866	0.0020396144563766	down in d0 cTfh
ENSG00000198763	MT-ND2	1.0380576877856	5.6014021852128e-06	down in d0 cTfh
ENSG00000210135	MT-TN	1.03862234009858	2.12138257674236e-05	down in d0 cTfh
ENSG00000228253	MT-ATP8	0.83438888580423	0.00154363606050859	down in d0 cTfh
ENSG00000212907	MT-ND4L	0.962072036265921	0.000761496591759157	down in d0 cTfh
ENSG00000198786	MT-ND5	0.724707255878896	0.000211434985893987	down in d0 cTfh
ENSG00000198695	MT-ND6	1.14813078455555	7.98309699088522e-07	down in d0 cTfh
ENSG00000198727	MT-CYB	0.684685968679191	0.00475323390594219	down in d0 cTfh
