# Supplementary material for: Impaired HA-specific T follicular helper cell and antibody responses to influenza vaccination are linked to inflammation in humans
Source: eLife. 2021 Nov 2;10:e70554. doi: 10.7554/eLife.70554 (PMC8562996; doi:10.7554/eLife.70554)
Supplement: Supplementary file 1. — Table of the immunological parameters used in this study [file elife-70554-supp1.xlsx]

## Sheet: Sheet1
Var #	var name	included in initial trajectory analysis	retained post PC1 trimming
1	cytokine_Luminex_d0_April..pg.mL.	Y	Y
2	cytokine_Luminex_d0_BAFF..pg.mL.	Y
3	cytokine_Luminex_d0_BCMA..pg.mL.	Y
4	cytokine_Luminex_d0_CXCL13..pg.mL.
5	cytokine_Luminex_d0_Light..pg.mL.	Y
6	cytokine_Luminex_d0_OSTEOPONTIN..pg.mL.	Y
7	cytokine_Luminex_d0_SCF..pg.mL.	Y
8	cytokine_Luminex_d0_TWEAK..pg.mL.	Y
9	cytokine_Luminex_d7_April..pg.mL.	Y
10	cytokine_Luminex_d7_BAFF..pg.mL.	Y
11	cytokine_Luminex_d7_BCMA..pg.mL.	Y
12	cytokine_Luminex_d7_CXCL13..pg.mL.
13	cytokine_Luminex_d7_Light..pg.mL.	Y
14	cytokine_Luminex_d7_OSTEOPONTIN..pg.mL.	Y
15	cytokine_Luminex_d7_SCF..pg.mL.	Y
16	cytokine_Luminex_d7_TWEAK..pg.mL.	Y
17	cytokine_Luminex_d42_April..pg.mL.
18	cytokine_Luminex_d42_BAFF..pg.mL.
19	cytokine_Luminex_d42_BCMA..pg.mL.
20	cytokine_Luminex_d42_CXCL13..pg.mL.
21	cytokine_Luminex_d42_Light..pg.mL.
22	cytokine_Luminex_d42_OSTEOPONTIN..pg.mL.
23	cytokine_Luminex_d42_SCF..pg.mL.
24	cytokine_Luminex_d42_TWEAK..pg.mL.
25	flu_Ab_Luminex_d0_A.BJ03
26	flu_Ab_Luminex_d0_A.Cali09	Y	Y
27	flu_Ab_Luminex_d0_A.gfHK99
28	flu_Ab_Luminex_d0_A.HK68	Y
29	flu_Ab_Luminex_d0_A.Jap57	Y
30	flu_Ab_Luminex_d0_A.NewCal99	Y	Y
31	flu_Ab_Luminex_d0_A.PC73	Y	Y
32	flu_Ab_Luminex_d0_A.Perth09	Y	Y
33	flu_Ab_Luminex_d0_A.PR8
34	flu_Ab_Luminex_d0_A.rheaNC93	Y	Y
35	flu_Ab_Luminex_d0_A.SC18	Y	Y
36	flu_Ab_Luminex_d0_A.SH13
37	flu_Ab_Luminex_d0_A.Swi13	Y	Y
38	flu_Ab_Luminex_d0_A.SZ06
39	flu_Ab_Luminex_d0_A.Taiw13	Y	Y
40	flu_Ab_Luminex_d0_A.Tex12	Y	Y
41	flu_Ab_Luminex_d0_A.Tex91
42	flu_Ab_Luminex_d0_A.USSR77
43	flu_Ab_Luminex_d0_A.Vic11	Y	Y
44	flu_Ab_Luminex_d0_A.Viet04
45	flu_Ab_Luminex_d0_B.Bris08	Y	Y
46	flu_Ab_Luminex_d0_B.Maly04	Y	Y
47	flu_Ab_Luminex_d0_B.Mass12	Y	Y
48	flu_Ab_Luminex_d0_B.Phu13	Y	Y
49	flu_Ab_Luminex_d0_B.Wis10	Y	Y
50	flu_Ab_Luminex_d0_cH4.7	Y
51	flu_Ab_Luminex_d0_cH5.1Cal
52	flu_Ab_Luminex_d0_cH5.1PR8
53	flu_Ab_Luminex_d0_cH5.3	Y
54	flu_Ab_Luminex_d0_cH9.1
55	flu_Ab_Luminex_d0_H5.Head
56	flu_Ab_Luminex_d0_H9.Head
57	flu_Ab_Luminex_d7_A.BJ03
58	flu_Ab_Luminex_d7_A.Cali09	Y	Y
59	flu_Ab_Luminex_d7_A.gfHK99
60	flu_Ab_Luminex_d7_A.HK68	Y
61	flu_Ab_Luminex_d7_A.Jap57	Y
62	flu_Ab_Luminex_d7_A.NewCal99	Y	Y
63	flu_Ab_Luminex_d7_A.PC73	Y	Y
64	flu_Ab_Luminex_d7_A.Perth09	Y	Y
65	flu_Ab_Luminex_d7_A.PR8
66	flu_Ab_Luminex_d7_A.rheaNC93	Y	Y
67	flu_Ab_Luminex_d7_A.SC18	Y	Y
68	flu_Ab_Luminex_d7_A.SH13
69	flu_Ab_Luminex_d7_A.Swi13	Y	Y
70	flu_Ab_Luminex_d7_A.SZ06
71	flu_Ab_Luminex_d7_A.Taiw13	Y	Y
72	flu_Ab_Luminex_d7_A.Tex12	Y	Y
73	flu_Ab_Luminex_d7_A.Tex91
74	flu_Ab_Luminex_d7_A.USSR77
75	flu_Ab_Luminex_d7_A.Vic11	Y	Y
76	flu_Ab_Luminex_d7_A.Viet04
77	flu_Ab_Luminex_d7_B.Bris08	Y	Y
78	flu_Ab_Luminex_d7_B.Maly04	Y	Y
79	flu_Ab_Luminex_d7_B.Mass12	Y	Y
80	flu_Ab_Luminex_d7_B.Phu13	Y	Y
81	flu_Ab_Luminex_d7_B.Wis10	Y	Y
82	flu_Ab_Luminex_d7_cH4.7	Y
83	flu_Ab_Luminex_d7_cH5.1Cal
84	flu_Ab_Luminex_d7_cH5.1PR8
85	flu_Ab_Luminex_d7_cH5.3	Y
86	flu_Ab_Luminex_d7_cH9.1
87	flu_Ab_Luminex_d7_H5.Head
88	flu_Ab_Luminex_d7_H9.Head
89	flu_Ab_Luminex_d42_A.BJ03
90	flu_Ab_Luminex_d42_A.Cali09
91	flu_Ab_Luminex_d42_A.gfHK99
92	flu_Ab_Luminex_d42_A.HK68
93	flu_Ab_Luminex_d42_A.Jap57
94	flu_Ab_Luminex_d42_A.NewCal99
95	flu_Ab_Luminex_d42_A.PC73
96	flu_Ab_Luminex_d42_A.Perth09
97	flu_Ab_Luminex_d42_A.PR8
98	flu_Ab_Luminex_d42_A.rheaNC93
99	flu_Ab_Luminex_d42_A.SC18
100	flu_Ab_Luminex_d42_A.SH13
101	flu_Ab_Luminex_d42_A.Swi13
102	flu_Ab_Luminex_d42_A.SZ06
103	flu_Ab_Luminex_d42_A.Taiw13
104	flu_Ab_Luminex_d42_A.Tex12
105	flu_Ab_Luminex_d42_A.Tex91
106	flu_Ab_Luminex_d42_A.USSR77
107	flu_Ab_Luminex_d42_A.Vic11
108	flu_Ab_Luminex_d42_A.Viet04
109	flu_Ab_Luminex_d42_B.Bris08
110	flu_Ab_Luminex_d42_B.Maly04
111	flu_Ab_Luminex_d42_B.Mass12
112	flu_Ab_Luminex_d42_B.Phu13
113	flu_Ab_Luminex_d42_B.Wis10
114	flu_Ab_Luminex_d42_cH4.7
115	flu_Ab_Luminex_d42_cH5.1Cal
116	flu_Ab_Luminex_d42_cH5.1PR8
117	flu_Ab_Luminex_d42_cH5.3
118	flu_Ab_Luminex_d42_cH9.1
119	flu_Ab_Luminex_d42_H5.Head
120	flu_Ab_Luminex_d42_H9.Head
121	HAI_d0_log2.titre	Y	Y
122	HAI_d7_log2.titre	Y	Y
123	HAI_d42_log2.titre
124	B_flow_d0_ASCs...Freq..of.CD19
125	B_flow_d0_CD19.ve...Freq..of.Parent
126	B_flow_d0_CD27.ve...Freq..of.CD19
127	B_flow_d7_ASCs...Freq..of.CD19
128	B_flow_d7_CD19.ve...Freq..of.Parent
129	B_flow_d7_CD27.ve...Freq..of.CD19
130	T_flow_d0_CTFH.HIGH.HIGH.OF.CD45RA	Y	Y
131	T_flow_d0_ICOS.OF.CTFH.HIGH.HIGH	Y	Y
132	T_flow_d0_CD45RA.OF.CD3.CD4	Y
133	T_flow_d0_CD3.CD4.OF.LIVE	Y
134	T_flow_d0_CTFH.OF.TET.ALL	Y	Y
135	T_flow_d0_TET.ALL.OF.CD4	Y	Y
136	T_flow_d0_ICOS.TET.ALL.OF.CD45RA	Y	Y
137	T_flow_d0_PD1.OF.TET.ALL	Y	Y
138	T_flow_d0_ICOS.OF.TET.ALL
139	T_flow_d7_CTFH.HIGH.HIGH.OF.CD45RA	Y	Y
140	T_flow_d7_ICOS.OF.CTFH.HIGH.HIGH	Y	Y
141	T_flow_d7_CD45RA.OF.CD3.CD4	Y
142	T_flow_d7_CD3.CD4.OF.LIVE	Y
143	T_flow_d7_CTFH.OF.TET.ALL	Y	Y
144	T_flow_d7_TET.ALL.OF.CD4	Y	Y
145	T_flow_d7_ICOS.TET.ALL.OF.CD45RA	Y	Y
146	T_flow_d7_PD1.OF.TET.ALL	Y	Y
147	T_flow_d7_ICOS.OF.TET.ALL
