# Supplementary material for: Impaired HA-specific T follicular helper cell and antibody responses to influenza vaccination are linked to inflammation in humans
Source: eLife. 2021 Nov 2;10:e70554. doi: 10.7554/eLife.70554 (PMC8562996; doi:10.7554/eLife.70554)
Supplement: Supplementary file 2. — Table of the gene names used for the inflammation, TNF, and IL-2 gene signatures. [file elife-70554-supp2.xlsx]

## Sheet: Sheet1
Inflammation score	IL2 Score	TNF Score
ADM	CDKN1A	AHNAK
CCL2	CEBPB	ARL4A"
CCL20	CEBPD	BHLHE40
CCL5	DUSP1	CAPG
CD36	DUSP2	EMP1
CD55	FOS	FAH
CD74	G0S2	GADD45B
CD82	GCH1	HOPX
CFH	ID2	IFNGR1
CSF2RB	IER2	KLF6
CTSH	IER3	PNP
CXCL8	IER5	PTCH1
DPP4	JUN	RGS16
EREG	JUNB	RNH1
FCER1G	KDM6B	RORA
FCN1	KLF10	SLC1A5
FPR1	MSC	SLC39A8
GNAI3	NFKB2	SYNGR2
GP1BA	NFKBIA	XBP1
HLA-B	NINJ1
HLA-DRB1
ICAM1
IL18R1
IL2RB
IL6
ITGA5
LAP3
LCK
LCP2
LY6E
MYD88
NFKB1
NLRP3
OLR1
OSM
PDE4B
PHLDA2
PLAUR
PTGS2
RCE1
RELB
RHOG
RIPK1
RNF4
S100A12
SERPINB2
SERPING1
SLAMF7
SRI
STAT4
STX4
TANK
TIMP1
TNFAIP3
TNFAIP6
VCPIP1
ZC3H12A
ZFP36
