# Supplementary material for: Impaired HA-specific T follicular helper cell and antibody responses to influenza vaccination are linked to inflammation in humans
Source: eLife. 2021 Nov 2;10:e70554. doi: 10.7554/eLife.70554 (PMC8562996; doi:10.7554/eLife.70554)
Supplement: Supplementary file 3. — Table of the flow cytometry staining panel used for identifying B cell subsets. [file elife-70554-supp3.xlsx]

## Sheet: Sheet1
Antibody panel for B cells
Marker	clone	Fluorochrome	company	catalog no.
viability dye	n/a	eFluor780	Thermo Fisher	65-0865-18
CD14	61D3	APC-eF780	Thermo Fisher	47-0149-42
CD16	eBioCB16	APC-eF780	Thermo Fisher	47-0168-42
CD3	UCHT1	BV605	Biolegend	300460
CD19	HIB19	BB515	BD Biosciences	564456
IgD	IA6-2	BV421	BD Biosciences	563813
CD38	HIT2	APC	Thermo Fisher	17-0389-42
CD20	2H7	PECY7	Biolegend	302312
CD27	M-T271	BV650	BD Biosciences	564894
CD24	eBioSN3	PerCP-eFluor 710	Thermo Fisher	46-0247-42
