# Supplementary material for: Impaired HA-specific T follicular helper cell and antibody responses to influenza vaccination are linked to inflammation in humans
Source: eLife. 2021 Nov 2;10:e70554. doi: 10.7554/eLife.70554 (PMC8562996; doi:10.7554/eLife.70554)
Supplement: Supplementary file 4. — Table of the flow cytometry staining panel used for identifying T cell subsets. [file elife-70554-supp4.xlsx]

## Sheet: Staining panels
Antibody panel for T cells
Marker	clone	Fluorochrome	company	catalog no.
viability dye	n/a	eFluor780	Thermo Fisher	65-0865-18
CD14	61D3	APC-eF780	Thermo Fisher	47-0149-42
CD16	eBioCB16	APC-eF780	Thermo Fisher	47-0168-42
CD19	HIB19	APC-eF780	Thermo Fisher	47-0199-42
CD3	UCHT1	BUV 395	BD Biosciences	563546
CD45RA	HI100	BUV737	BD Biosciences	564442
CD4	RPA-T4	PercpCy5.5	BD Biosciences	560650
CXCR5	RF8B2	BB515	BD Biosciences	564624
PD1	eBioJ105	APC	Thermo Fisher	17-2799-42
ICOS	ISA-3	biotin	Thermo Fisher	13-9948-82
CXCR3	1C6/CXCR3	BV421	BD Biosciences	562558
CCR6	11A9	BV786	BD Biosciences	563704
Streptavidin	-	BV650	BD Biosciences	563855
